# Supplementary material for: A Revised Modular Approach to (–)‐trans‐Δ8‐THC and Derivatives Through Late‐Stage Suzuki–Miyaura Cross‐Coupling Reactions
Source: PubMed Central journal article supplement (PMC6686972; doi:10.1002/ejoc.201900059), 2019-03-18

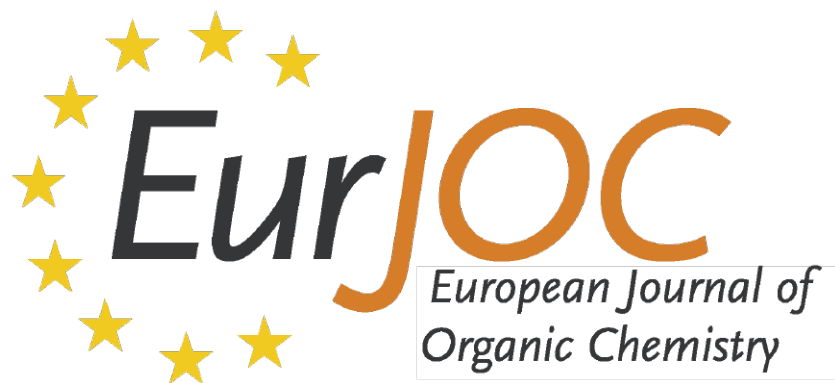

## Supporting Information

### **A Revised Modular Approach to (-)-*trans*- $\Delta^8$ -THC and Derivatives Through Late-Stage Suzuki–Miyaura Cross-Coupling Reactions**

Victor R. L. J. Bloemendal, Daan Sondag, Hidde Elferink,  
Thomas J. Boltje, Jan. C. M. van Hest,\* and Floris P. J. T. Rutjes\*

[ejoc201900059-sup-0001-SupMat.pdf](#)

## Table of Contents

---

|                                                                                               | <b>Pages</b> |
|-----------------------------------------------------------------------------------------------|--------------|
| I. Initial Cross-Coupling Conditions on <b>4</b>                                              | S2           |
| II. NMR Data Comparison Compound <b>5</b> and <b>6</b>                                        | S3-S5        |
| III. NMR Data Comparison of Regioisomers <b>10c</b> and <b>11c</b>                            | S6           |
| IV. NMR Data Comparison of Atropisomers <b>10b-R<sub>a</sub></b> and <b>10b-S<sub>a</sub></b> | S7-S9        |
| v. <sup>1</sup> H, <sup>13</sup> C, <sup>11</sup> B and <sup>19</sup> F NMR Spectra           | S10-S46      |

## I. Initial Cross-Coupling Conditions on **4**

**Table 1.** Initial cross-coupling conditions on **4** towards (-)-*Trans*- $\Delta^8$ -THC derivatives.

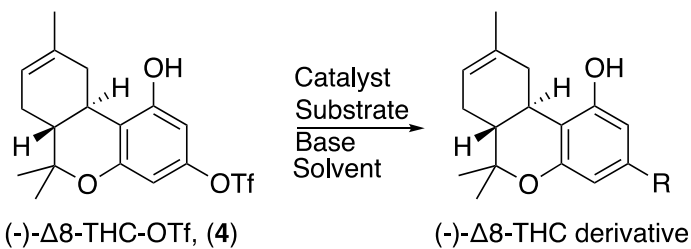

| Entry <sup>a</sup> | Catalyst                                          | Substrate | Base                                                     | Solvent                     | Conv. <sup>b</sup> |
|--------------------|---------------------------------------------------|-----------|----------------------------------------------------------|-----------------------------|--------------------|
| I.                 | 6% Pd(dppf)Cl <sub>2</sub>                        |           | Cs <sub>2</sub> CO <sub>3</sub>                          | MeOH                        | 0%                 |
| II.                | 3% Pd(OAc) <sub>2</sub>                           |           | NaOH                                                     | THF                         | 0%                 |
| III.               | 9% Pd(dppf)Cl <sub>2</sub>                        |           | K <sub>2</sub> CO <sub>3</sub>                           | PhMe                        | 0%                 |
| IV.                | 9% Pd(dppf)Cl <sub>2</sub>                        |           | K <sub>2</sub> CO <sub>3</sub>                           | THF:H <sub>2</sub> O (10:1) | 0%                 |
| V.                 | 9% Pd(dppf)Cl <sub>2</sub>                        |           | NaOH                                                     | THF:H <sub>2</sub> O (10:1) | 0%                 |
| VI.                | 9% Pd(dppf)Cl <sub>2</sub>                        |           | Cs <sub>2</sub> CO <sub>3</sub> Ag <sub>2</sub> O (2 eq) | THF                         | 0%                 |
| VII.               | 2% Pd(dppf)Cl <sub>2</sub>                        |           | KOAc                                                     | THF                         | 0%                 |
| VIII.              | 5% Pd(dppf)Cl <sub>2</sub>                        |           | K <sub>3</sub> PO <sub>4</sub>                           | PhMe                        | 0%                 |
| IX.                | 2% Pd <sub>2</sub> (dba) <sub>3</sub> + 5% RuPhos |           | K <sub>3</sub> PO <sub>4</sub>                           | PhMe                        | 0%                 |
| X.                 | 5% Pd(PPh <sub>3</sub> ) <sub>4</sub>             |           | Cs <sub>2</sub> CO <sub>3</sub>                          | PhMe                        | 0%                 |

<sup>a</sup>Reaction conditions: Substrate (1.6 eq), base (3 eq) and catalyst (mol%) combined, flask evacuated and backfilled with Ar thrice. **(4)** Was added in solvent and refluxed for 16h. <sup>b</sup>Conversion determined using crude <sup>1</sup>H-NMR.

## II. NMR Data Comparison Compounds 6 and 7

**Table 2:** <sup>1</sup>H-NMR and <sup>13</sup>C-NMR comparison of the two different THC bromide isomers **6** and **7**.

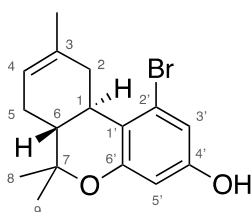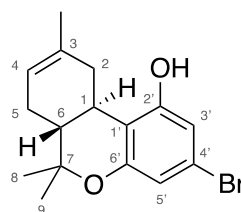

| POSITION | <sup>1</sup> H-NMR                                      | <sup>13</sup> C-NMR | <sup>1</sup> H-NMR                                            | <sup>13</sup> C-NMR |
|----------|---------------------------------------------------------|---------------------|---------------------------------------------------------------|---------------------|
| 1        | 2.64 (td, <i>J</i> = 10.5, 4.3 Hz)                      | 35.15               | 2.66 (td, <i>J</i> = 11.1, 4.8 Hz)                            | 31.70               |
| 2        | 2a) 3.41 (dd, <i>J</i> = 16.4, 3.4 Hz),<br>2b) 1.86 (m) | 36.80               | 2a) 3.16 (dd, <i>J</i> = 15.7, 4.4 Hz)<br>2b) 1.84 – 1.74 (m) | 35.81               |
| 3        |                                                         | 134.84              |                                                               | 134.67              |
|          | 1.71 (s)                                                | 23.56 (3-Me)        | 1.70 (s)                                                      | 23.58 (3-Me)        |
| 4        | 5.46 – 5.41 (m)                                         | 119.64              | 5.46 – 5.40 (m)                                               | 119.43              |
| 5        | 5a) 2.18 – 2.11 (m),<br>5b) 1.86 (m)                    | 28.41               | 5a) 2.19 – 2.09 (m)<br>5b) 1.84 – 1.74 (m)                    | 27.93               |
| 6        | 1.86 (m)                                                | 46.55               | 1.84 – 1.74 (m)                                               | 44.81               |
| 7        | -                                                       | 77.51               | -                                                             | 77.62               |
| 8        | 1.37 (s)                                                | 27.41               | 1.38 (s)                                                      | 27.53               |
| 9        | 1.07 (s)                                                | 18.29               | 1.09 (s)                                                      | 18.58               |
| 1'       | -                                                       | 118.78              | -                                                             | 112.74              |
| 2'       | -                                                       | 123.71              | 5.24 (s)                                                      | 155.94              |
| 3'       | <b>6.68 (d, <i>J</i> = 2.6 Hz)</b>                      | 113.64              | <b>6.61 (d, <i>J</i> = 1.9 Hz)</b>                            | 113.82              |
| 4'       | 5.05 (s)                                                | 155.01              | -                                                             | 119.77              |
| 5'       | <b>6.28 (d, <i>J</i> = 2.6 Hz)</b>                      | 104.40              | <b>6.43 (d, <i>J</i> = 1.9 Hz)</b>                            | 110.84              |
| 6'       | -                                                       | 155.81              | -                                                             | 155.79              |

The difference between **6** and **7** can be seen in the essential difference in shifts of the two aromatic protons (3' and 5') and their corresponding 0.7 Hz difference in *J*-coupling (Figure 1). The difference between the two isomers can also be visualized using TLC (0.12 difference in *R<sub>f</sub>* (EtOAc/*n*-heptane, 1/9 v/v), Figure 2). These compounds can easily be separated *via* silicagel column chromatography using an apolar eluent and slow gradient (0 - 4% - EtOAc in *n*-heptane). Best results were obtained using dry loading the crude mixture, a high amount of silicagel and starting with pure heptane (10-20 CV) and slowly going up to 4% EtOAc (10-20 CV).

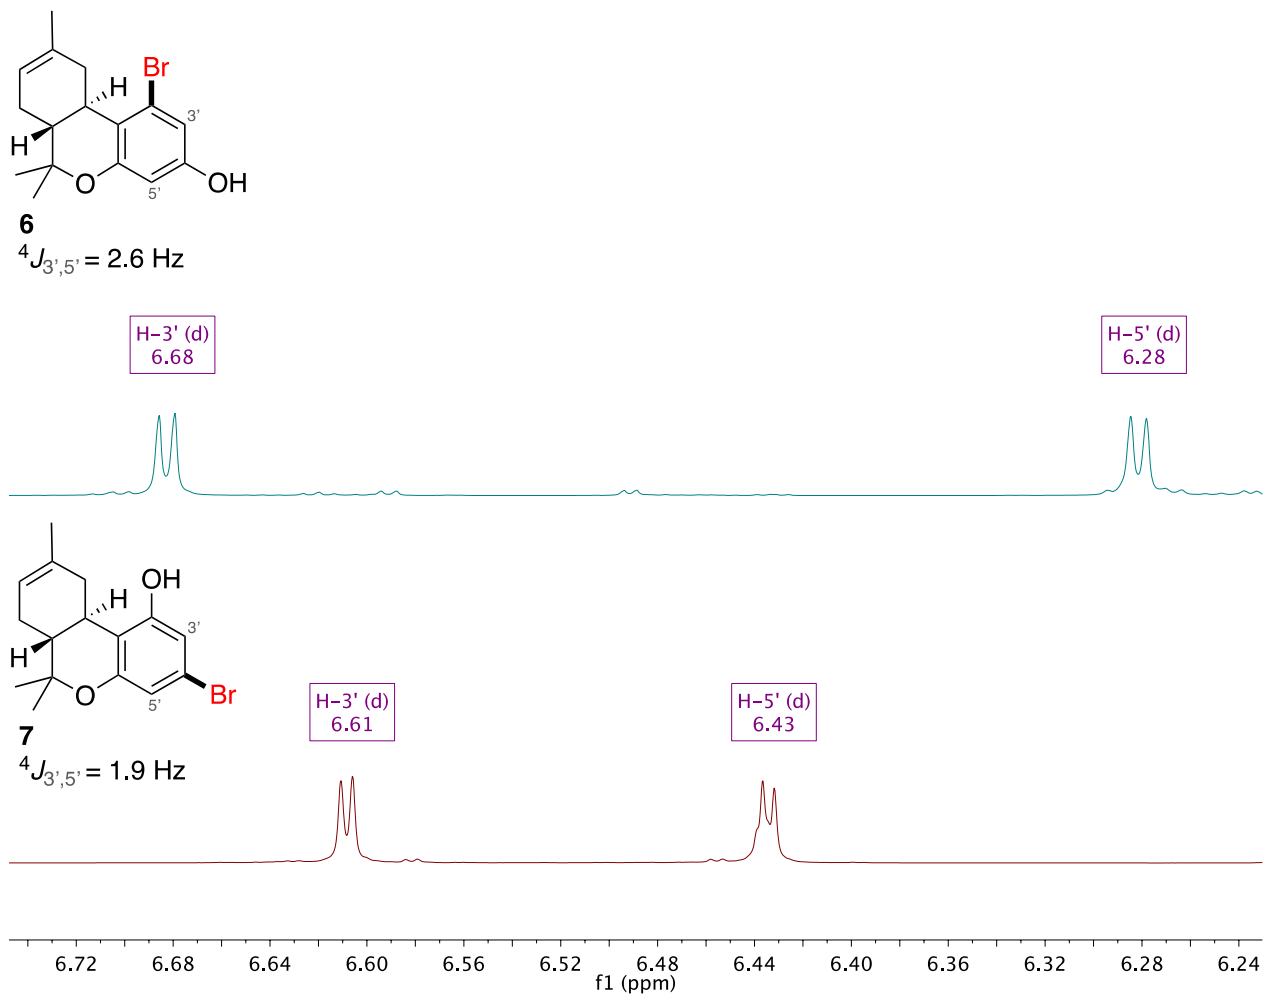

**Figure 1:**  ${}^1\text{H}$ -NMR spectrum of aryl protons H-3' and H-5' of both isomers **6** and **7** and their difference in shift and  ${}^4J_{3',5'}$ -coupling constant.

Assignment was performed with  ${}^1\text{H}$ - ${}^{13}\text{C}$ -HMBC spectroscopy. *Ortho* substituted product **6** shows a coupling of H-1 with carbon signal at 123.71 ppm, belonging to C-2' of the aryl-bromide (Figure 3). This three bond coupling is visible in the *ortho* substituted product **6** but not in *para* substituted **7** (119.77 ppm, C-4'). The lack of this signal indicates that the bromide is substituted at positions as assigned in Table 1. Extra evidence was found when **7** was converted into the readily known and synthesized (-)-*Trans*- $\Delta^8$ -tetrahydrocannabinol (**1**).

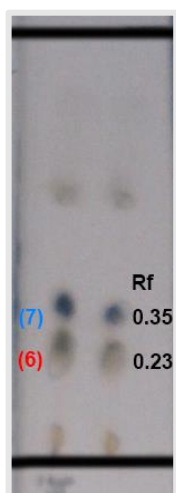

**Figure 2:** Corresponding difference on a TLC plate (EtOAc/*n*-heptane, 1/9 v/v) of the crude mixture of **6** and **7**.

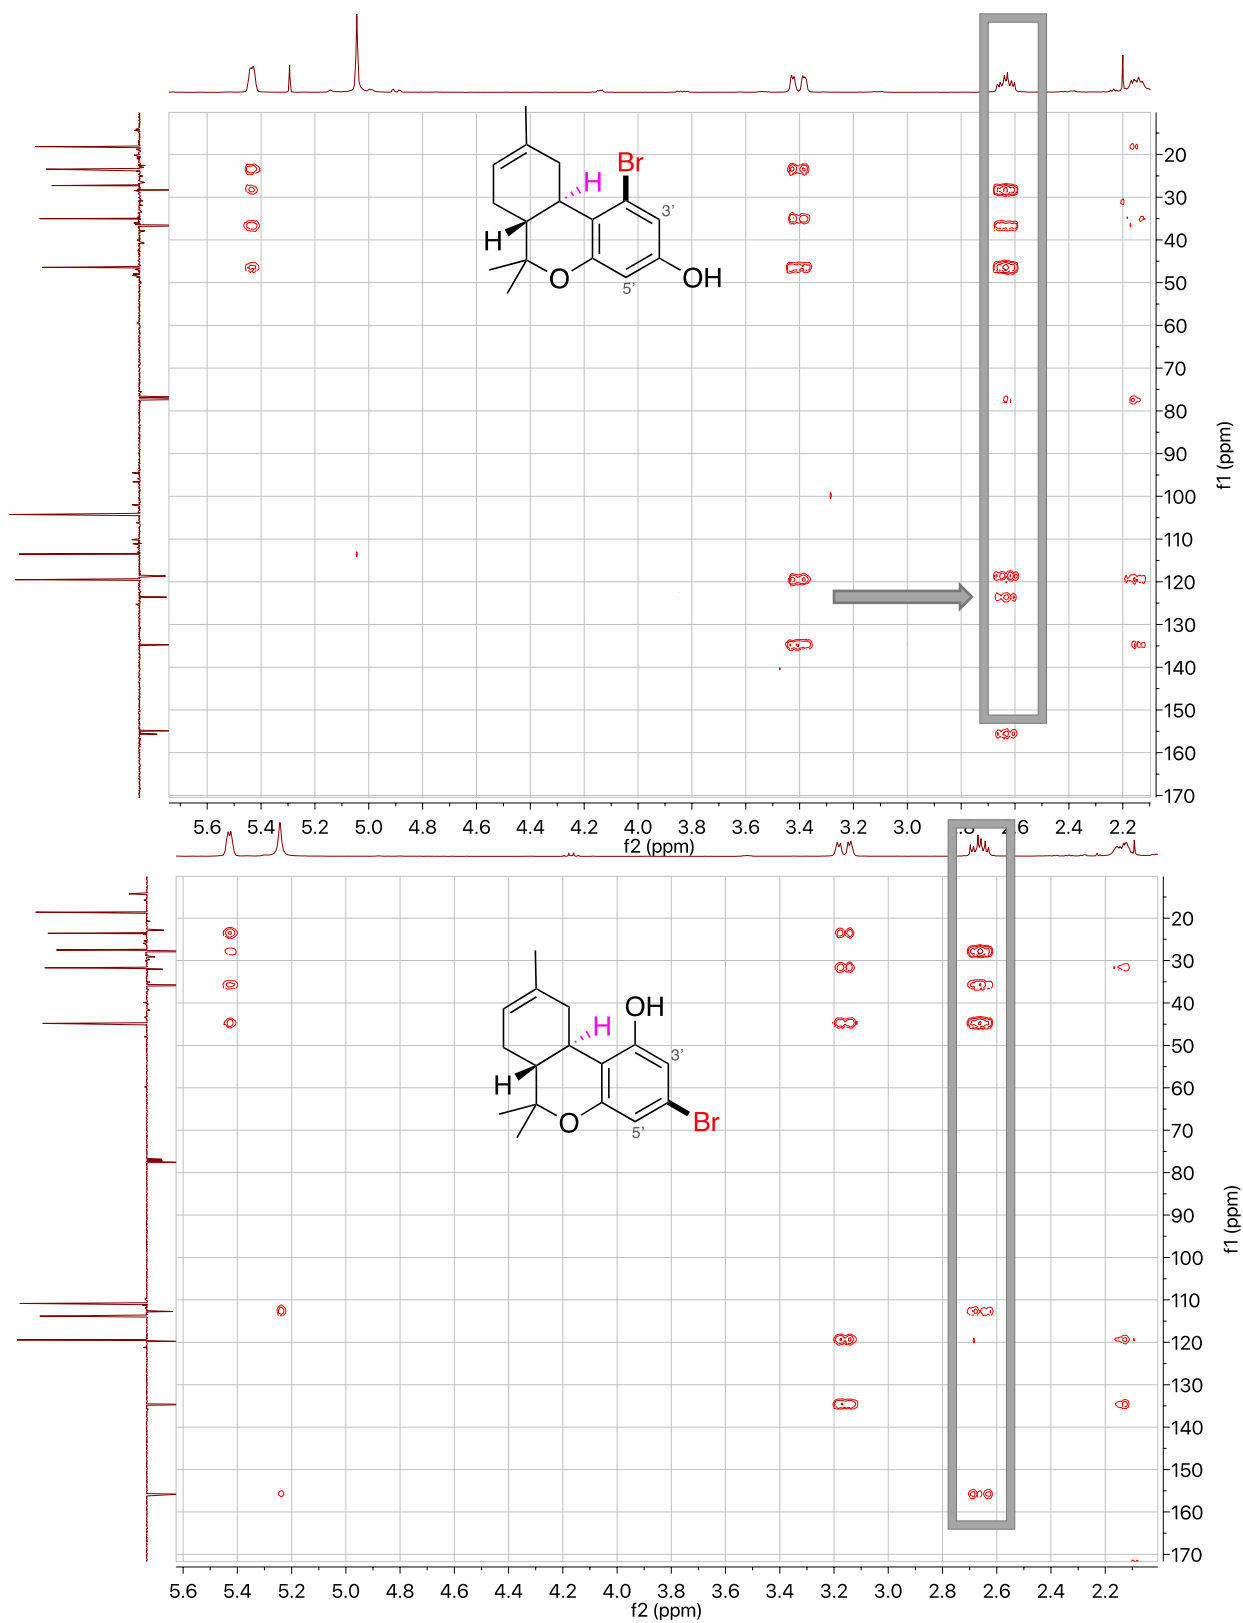

**Figure 3:** HMBC spectroscopy of **6** and **7** where **6** shows 3-bond coupling with C-Br (C-2') signal and **7** does not (C-4'; 5-bond coupling).

### III. NMR Data Comparison of Regioisomers 10c and 11c

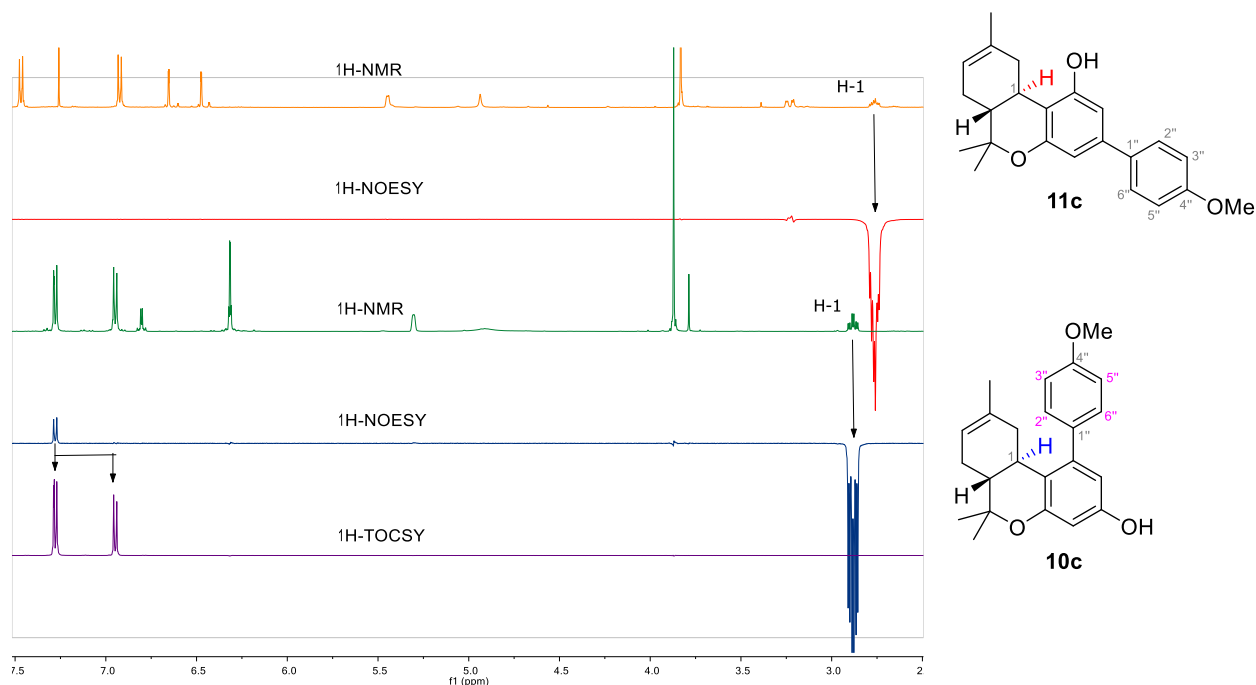

**Figure 4:** selective 1D  $^1\text{H-NOESY}$  and  $^1\text{H-TOCSY}$  NMR of regioisomers **11c** and **10c**, proving the spectroscopic difference. Top to bottom: 1 (Orange)  $^1\text{H-NMR}$  of **11c**. 2 (Red)  $^1\text{H-NOESY}$  of 2.76 ppm of **11c**, showing no neighboring protons and is therefore *para*-substituted product **11c**. 3 (Green)  $^1\text{H-NMR}$  of **10c**. 4 (Blue)  $^1\text{H-NOESY}$  of 2.88 ppm showing a correlation to 7.28 ppm (H-2'', H-6''). 4 (Purple)  $^1\text{H-TOCSY}$  of 7.28 ppm showing a correlation with 6.95 ppm (H-3'', H-5'') and is therefore ortho-substituted product **10c**.

#### IV. NMR Data Comparison of Atropisomers 10b-*R*<sub>a</sub> and 10b-*S*<sub>a</sub>

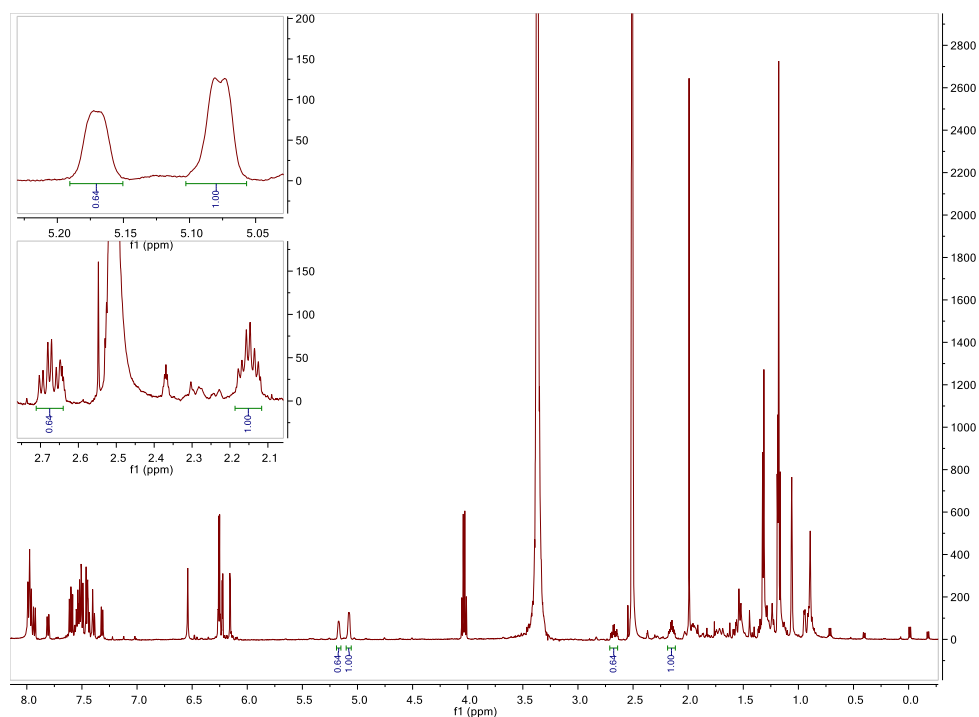

**Figure 5:** <sup>1</sup>H-NMR spectrum of **10b** in D<sub>6</sub>-DMSO and its observed isomers.

Following from the NMR data as shown in Figure 5, two isomers were identified and hypothesized rotamers. The rotamer was not confirmed using <sup>1</sup>H-EXSY and VT-NMR (T = 373 K) (data not shown). This result was proven using 1D-selective <sup>1</sup>H-TOCSY-NMR (Figure 6), showing only one isomer and no correlation between isomers.

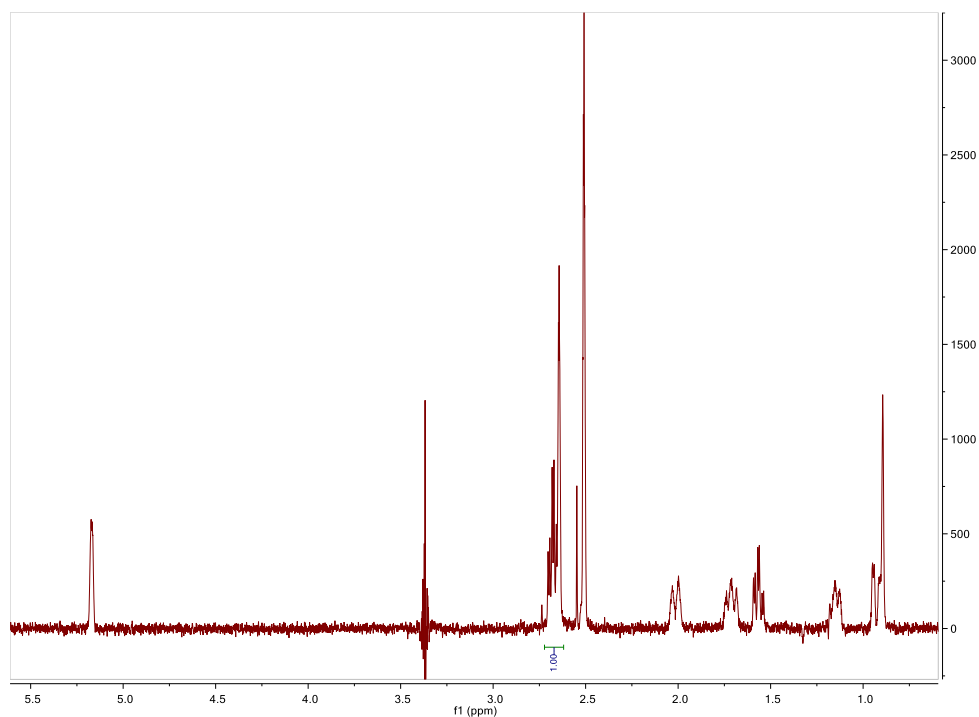

**Figure 6:** Selective-1D <sup>1</sup>H-TOCSY NMR on 2.67 ppm showing one isomer of **10b**.



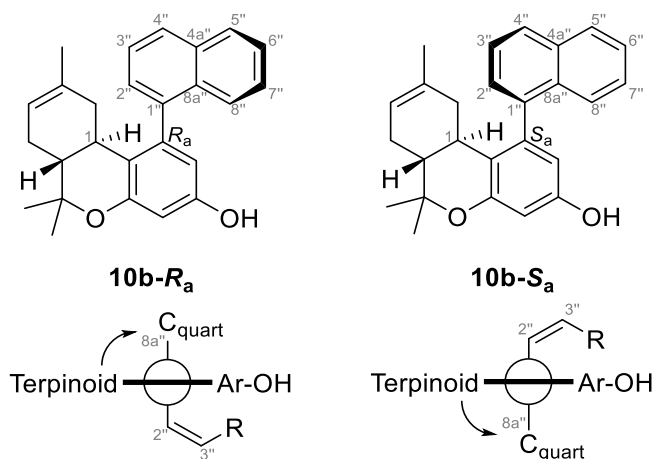

**Figure 7:** Structural difference between atropisomers **10b-R<sub>a</sub>** and **10b-S<sub>a</sub>** with the corresponding Newman projections.

**10b** Exists of two atropisomers, **10b-R<sub>a</sub>** and **10b-S<sub>a</sub>** (Figure 7). The orientation of the naphthalene moiety in isomers, causes a difference in chemical shift is observed in the <sup>1</sup>H-NMR due to the orientation of π-orbitals. To distinguish between both atropisomers, selective 1D <sup>1</sup>H-NOESY and <sup>1</sup>H-TOCSY NMR elucidated the individual molecules. In each isomer the central proton (H-1) shows a <sup>1</sup>H-NOESY correlation with one aromatic signal. A following <sup>1</sup>H-TOCSY experiment on the aromatic signal directly quantifies the naphthalene protons, and elucidates which signals belong to which atropisomer of **10b**. In this case **10b-S<sub>a</sub>** is observed in higher amounts than **10b-R<sub>a</sub>** (1.00 : 0.64 ratio).

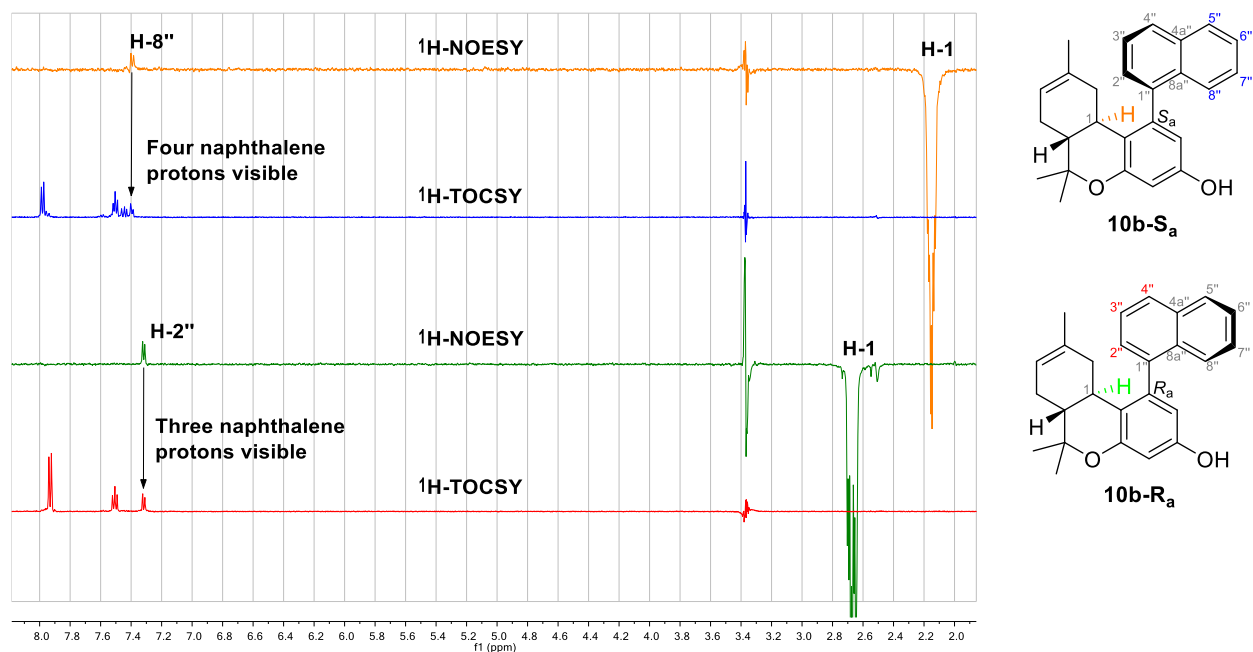

**Figure 8:** selective 1D <sup>1</sup>H-NOESY and <sup>1</sup>H-TOCSY NMR of both atropisomers of **10b**. Top to bottom: 1 (orange) <sup>1</sup>H-NOESY of 2.15 ppm showing a correlation to 7.39 ppm (H-8''). 2 (blue) <sup>1</sup>H-TOCSY of 7.39 ppm showing four naphthalene protons (H-5'' to H-8'') of compound **10b-S<sub>a</sub>**. 3 (green) <sup>1</sup>H-NOESY of 2.67 ppm showing a correlation to 7.32 ppm (H-2''). 4 (red) <sup>1</sup>H-TOCSY of 7.32 ppm showing three naphthalene protons (H-2'' to H-4'') of compound **10b-R<sub>a</sub>**

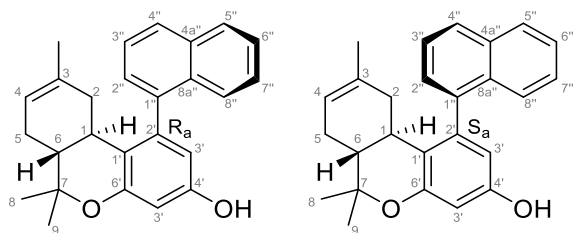

**2'-Naphthalene(-)-*trans*- $\Delta^8$ -tetrahydrocannabinol (10b):** Synthesized

according to general procedure (II) from 2'-bromo(-)-*trans*- $\Delta^8$ -tetrahydrocannabinol (**6**) (150.0 mg, 464  $\mu$ mol) and potassium (1-naphthalene) trifluoroborate (**24**) (174.0 mg, 743  $\mu$ mol) and purified using preparative HPLC which afforded (**10b**) (28.5 mg, 17%) as a colorless oil. The product was obtained as an inseparable mixture of two atropisomers **10b-R<sub>a</sub>** and **10b-S<sub>a</sub>** in respective ratio of 0.64:1.00. **TLC** (EtOAc/*n*-heptane, 1/9 v/v): *R<sub>f</sub>* = 0.15

**10b-R<sub>a</sub>**: **<sup>1</sup>H NMR** (500 MHz, DMSO-*d*<sub>6</sub>)  $\delta$  7.94 (d, *J* = 8.2 Hz, 1H, CH Ar), 7.81 (d, *J* = 7.9 Hz, 1H, CH Ar), 7.56 (dd, *J* = 6.8, 1.6 Hz, 1H, CH Ar), 7.56 – 7.52 (m, 1H, CH Ar), 7.45 – 7.43 (m, 1H, CH Ar), 7.41 – 7.39 (m, 1H, CH Ar), 7.32 (dd, *J* = 7.1, 1.2 Hz, 1H, CH Ar), 6.23 (d, *J* = 2.6 Hz, 1H, CH Ar, H-5'), 6.16 (d, *J* = 2.6 Hz, 1H, CH Ar, H-3'), 5.18 (d, *J* = 2.7 Hz, 1H, CH Alkene, H-4), 2.69 (dt, *J* = 11.2, 5.6 Hz, 1H, H-1), 2.04 (m, 1H, H-5a), 1.77 – 1.67 (m, 1H, H-5b), 1.58 (dd, *J* = 11.6, 4.4 Hz, 1H, H-6), 1.33 (s, 3H, CH<sub>3</sub>, H-8), 1.19 (s, 3H, CH<sub>3</sub>, H-9), 1.17 (s, 1H, H-2a), 0.93 (d, *J* = 12.6 Hz, 1H, H-2b), 0.92 – 0.86 (bs, 3H, H-10). **<sup>13</sup>C NMR** (126 MHz, DMSO-*d*<sub>6</sub>)  $\delta$  156.09 (C<sub>quart</sub> C-6'), 155.36 (C<sub>quart</sub> Naphthalene C-4'), 140.94 (C<sub>quart</sub> C-1''), 140.22 (C<sub>quart</sub> C-2'), 133.93 (C<sub>quart</sub> Naphthalene C-8a''), 133.30 (C Alkene C-3), 132.06 (C<sub>quart</sub> Naphthalene C-4a''), 128.49 (C-Ar), 127.63 (C-Ar), 126.62 (C-Ar), 126.36 (C-Ar), 126.29 (C-Ar), 125.92 (C-Ar), 125.85 (C-Ar), 119.94 (C Alkene C-4), 115.78 (C<sub>quart</sub> C-1'), 111.97 (C-5'), 103.51 (C-3'), 76.41 (C<sub>quart</sub> C-7), 45.15 (C-6), 36.65 (C-2), 32.61 (C-1), 27.75 (C-8), 27.56 (C-5), 23.14 (C-10), 18.86 (C-9).

**10b-S<sub>a</sub>**: **<sup>1</sup>H NMR** (500 MHz, DMSO-*d*<sub>6</sub>)  $\delta$  8.00 – 7.98 (m, 2H, CH Ar), 7.60 (dd, *J* = 8.3, 7.0 Hz, 1H, CH Ar), 7.51 (d, *J* = 1.5 Hz, 1H, CH Ar), 7.45 (m, 2H, CH Ar), 7.41 – 7.39 (m, 1H, CH Ar), 6.27 (d, *J* = 2.6 Hz, 1H, CH Ar, H-3'), 6.25 (d, *J* = 2.6 Hz, 1H, CH Ar, H-5'), 5.08 (d, *J* = 4.3 Hz, 1H, CH Alkene, H-4), 2.16 (td, *J* = 10.7, 4.9 Hz, 1H, H-1), 1.97 – 1.93 (m, 1H, H-5a), 1.55 – 1.53 (m, 2H, H-6, H-5b), 1.32 (s, 3H, CH<sub>3</sub>, H-8), 1.31 – 1.29 (m, 1H, H-2a), 1.18 (s, 3H, CH<sub>3</sub>, H-9), 1.06 (s, 3H, CH<sub>3</sub>, H-10), 0.97 – 0.90 (m, 1H, H-2b). **<sup>13</sup>C NMR** (126 MHz, DMSO-*d*<sub>6</sub>)  $\delta$  156.85 (C<sub>quart</sub> C-4'), 154.69 (C<sub>quart</sub> C-6'), 141.46 (C<sub>quart</sub> Naphthalene C-1''), 141.14 (C<sub>quart</sub> C-2'), 133.30 (C<sub>quart</sub> Naphthalene C-8a''), 133.26 (C<sub>quart</sub> C-3), 130.55 (C<sub>quart</sub> Naphthalene C-4a''), 128.83 (C-Ar), 127.89 (C-Ar), 126.93 (C-Ar), 126.67 (C-Ar), 126.45 (C-Ar), 126.09 (C-Ar), 125.41 (C-Ar), 119.68 (C Alkene C-4), 115.84 (C<sub>quart</sub> C-1'), 111.66 (C-5'), 103.65 (C-3'), 76.35 (C<sub>quart</sub> C-7), 45.01 (C-6), 37.58 (C-2), 33.44 (C-1), 27.75 (C-8), 27.56 (C-5), 23.31 (C-10), 18.90 (C-9). **HRMS** (*m/z*): [M+H]<sup>+</sup> calcd. for C<sub>26</sub>H<sub>26</sub>O<sub>2</sub>, 371.20110; found, 371.20214.

### V. <sup>1</sup>H, <sup>13</sup>C and <sup>19</sup>F NMR Spectra

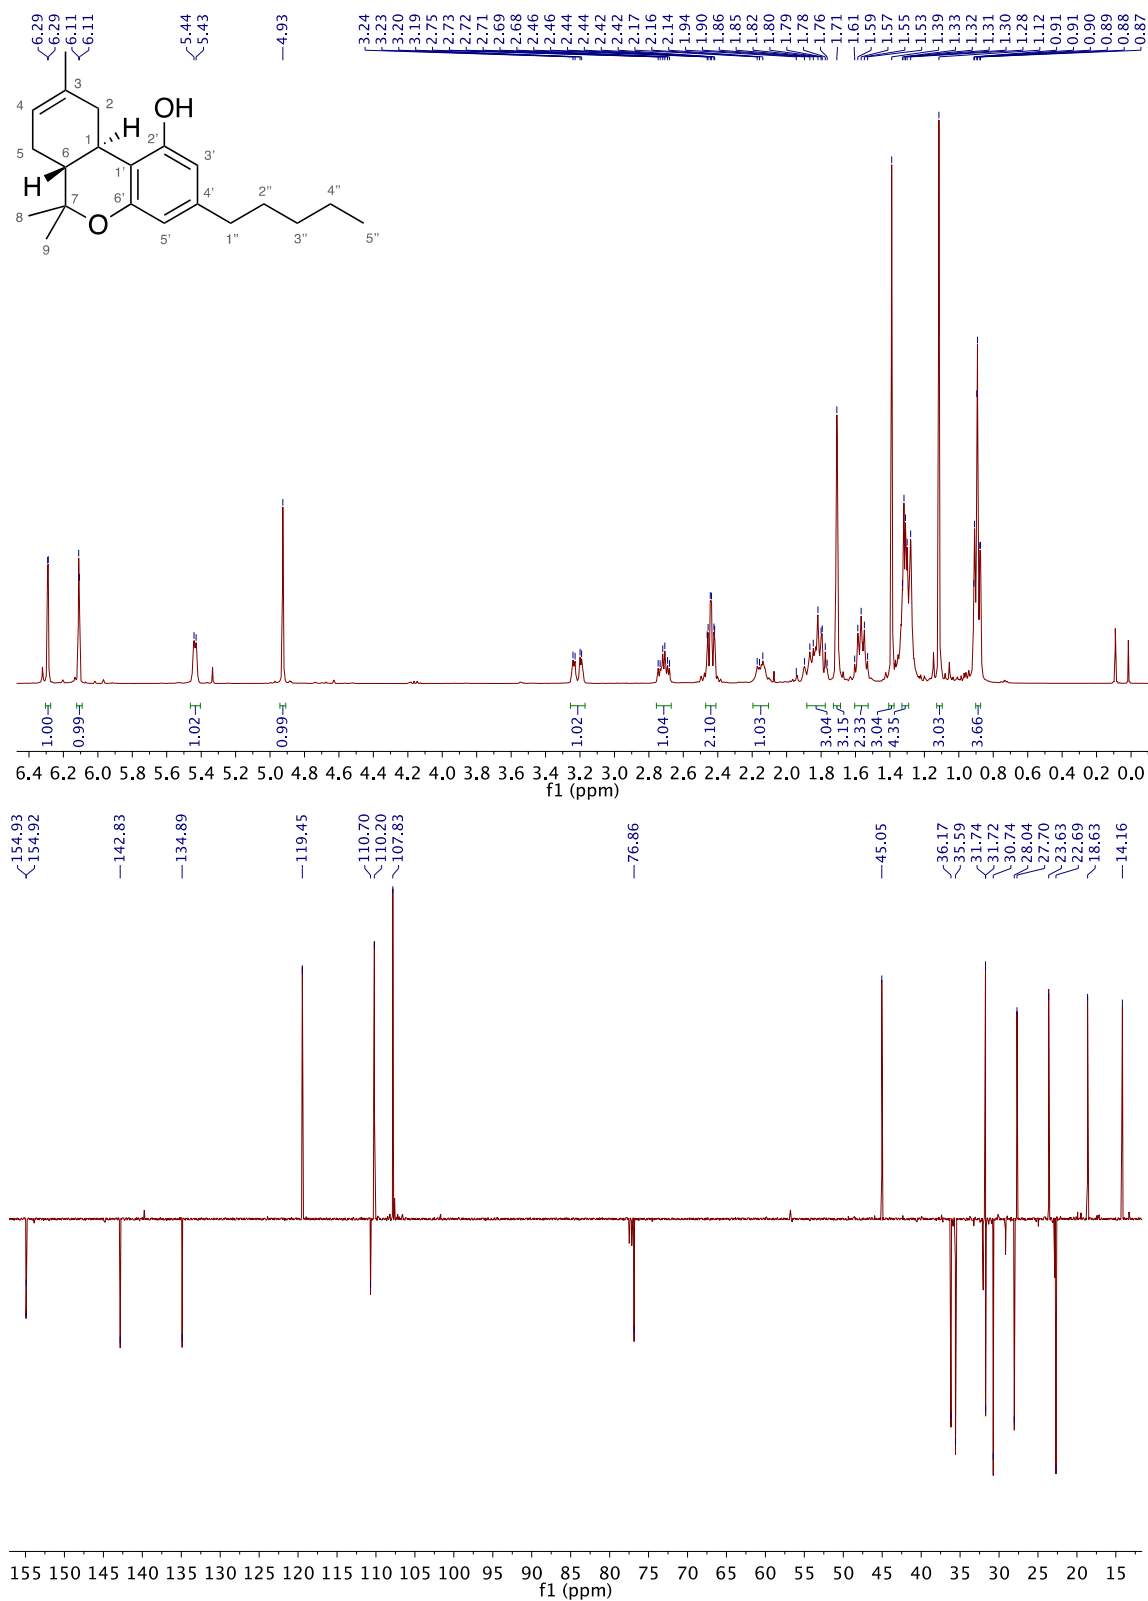

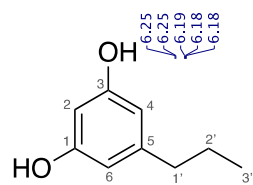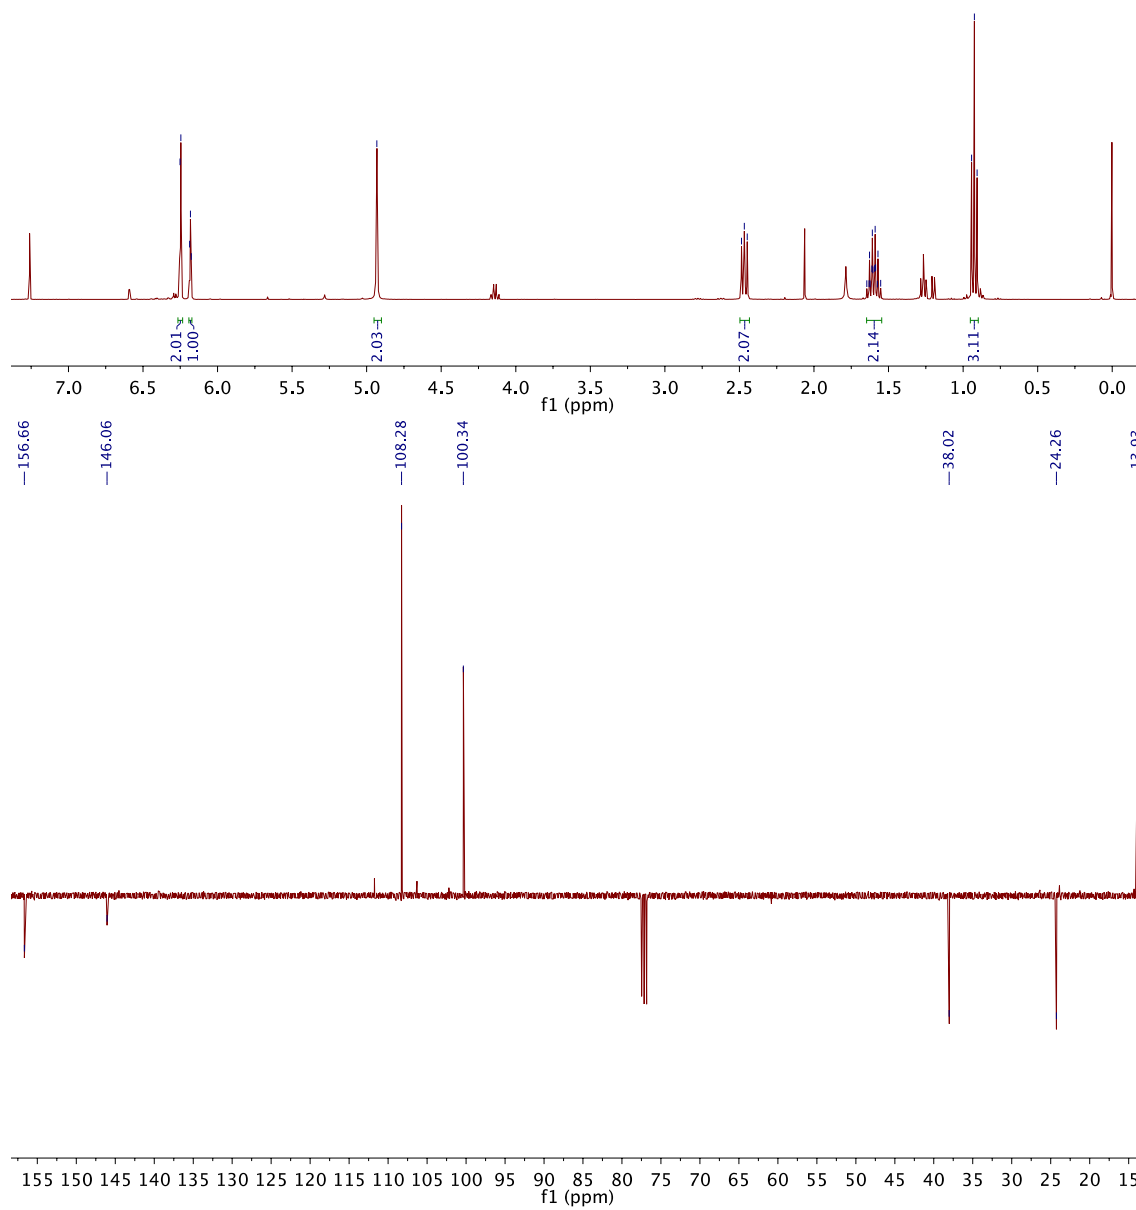

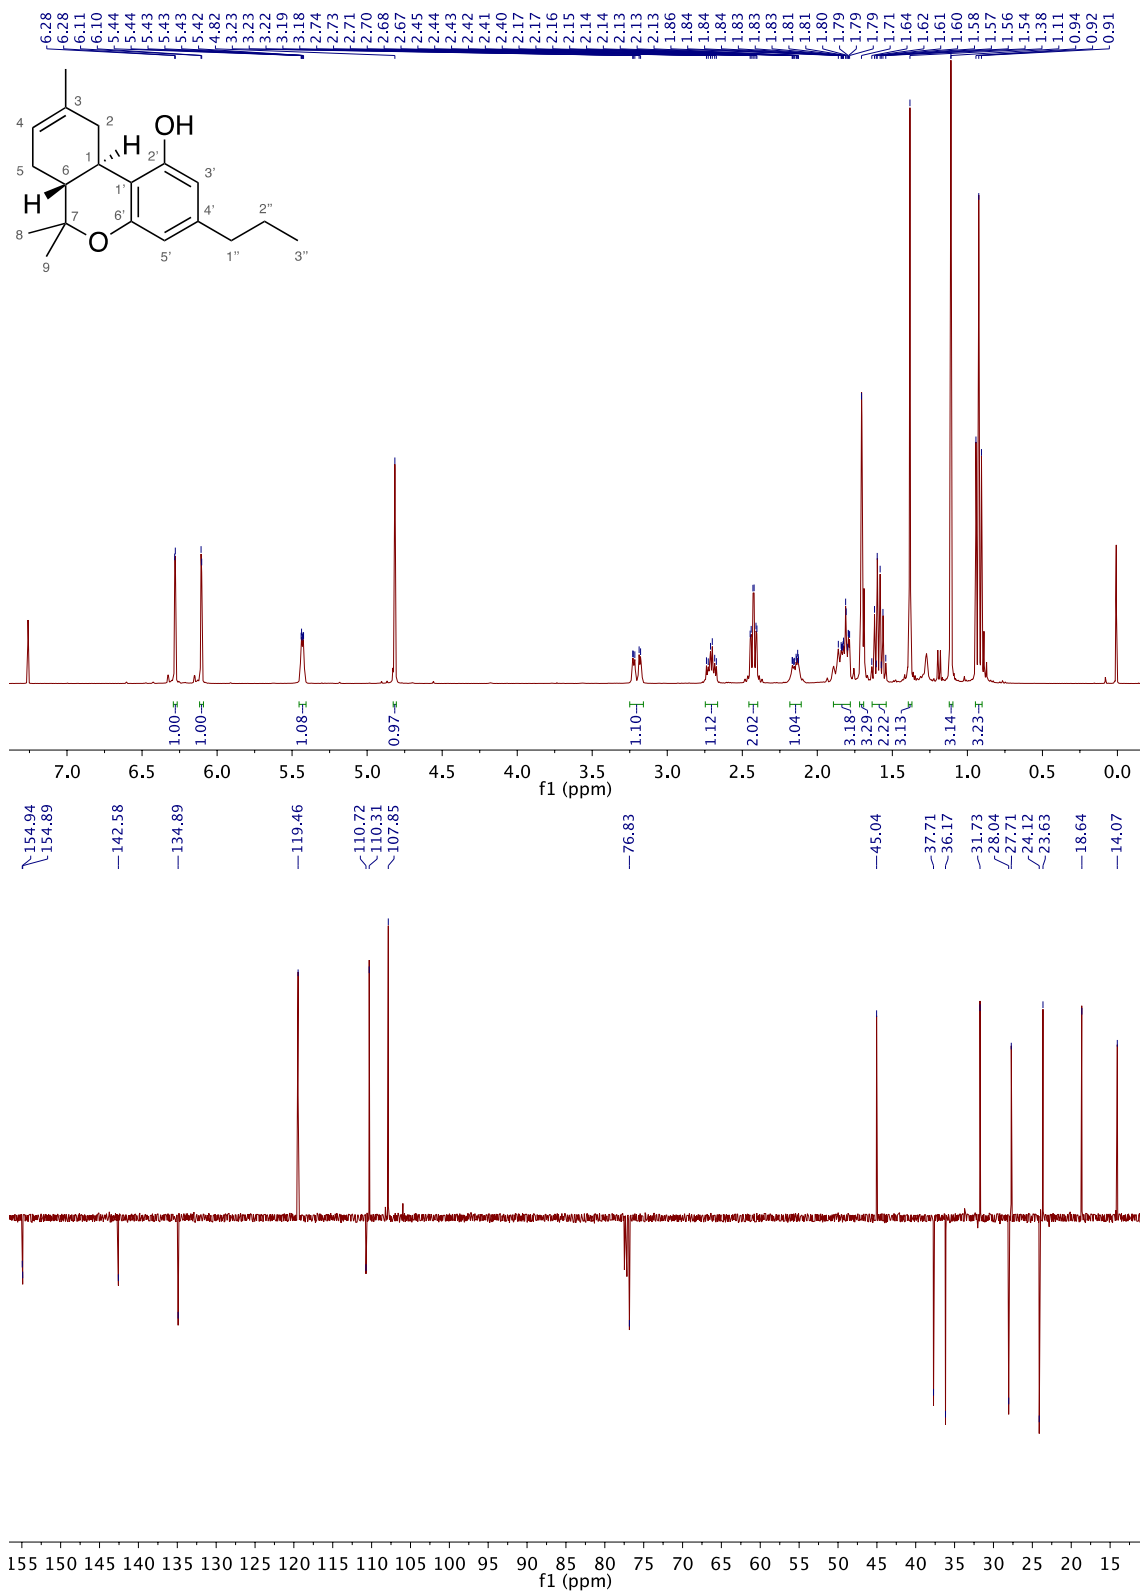

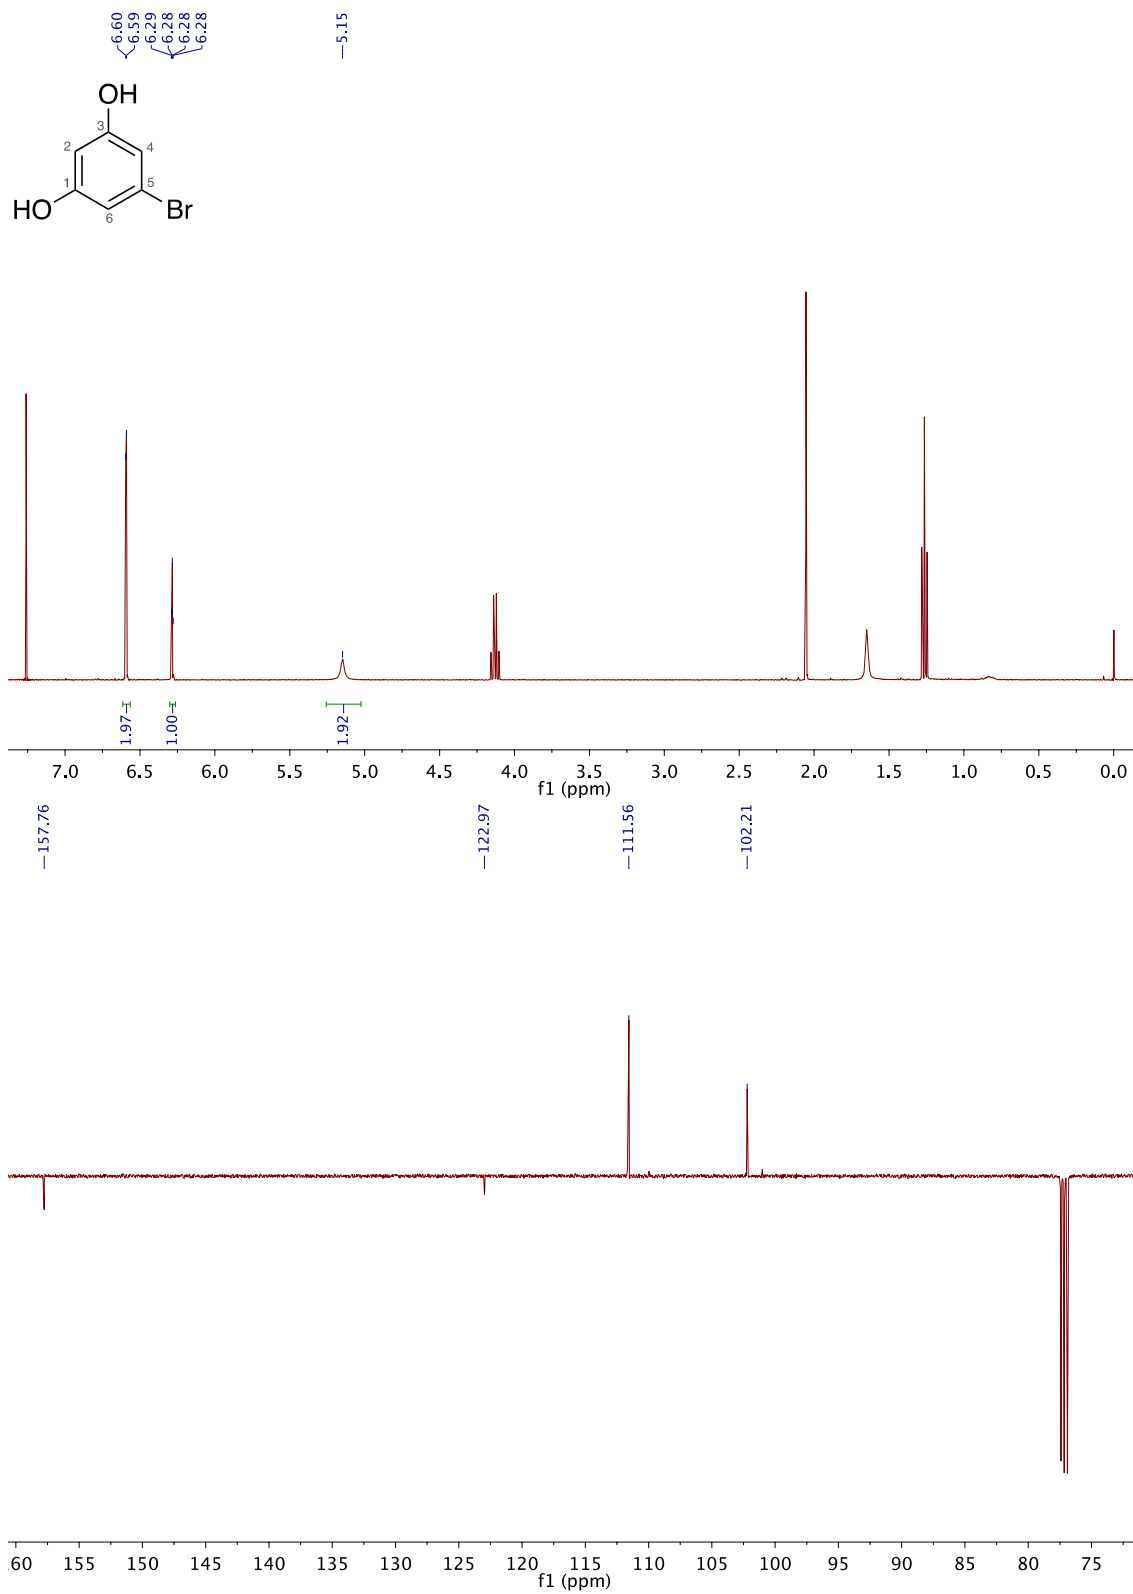

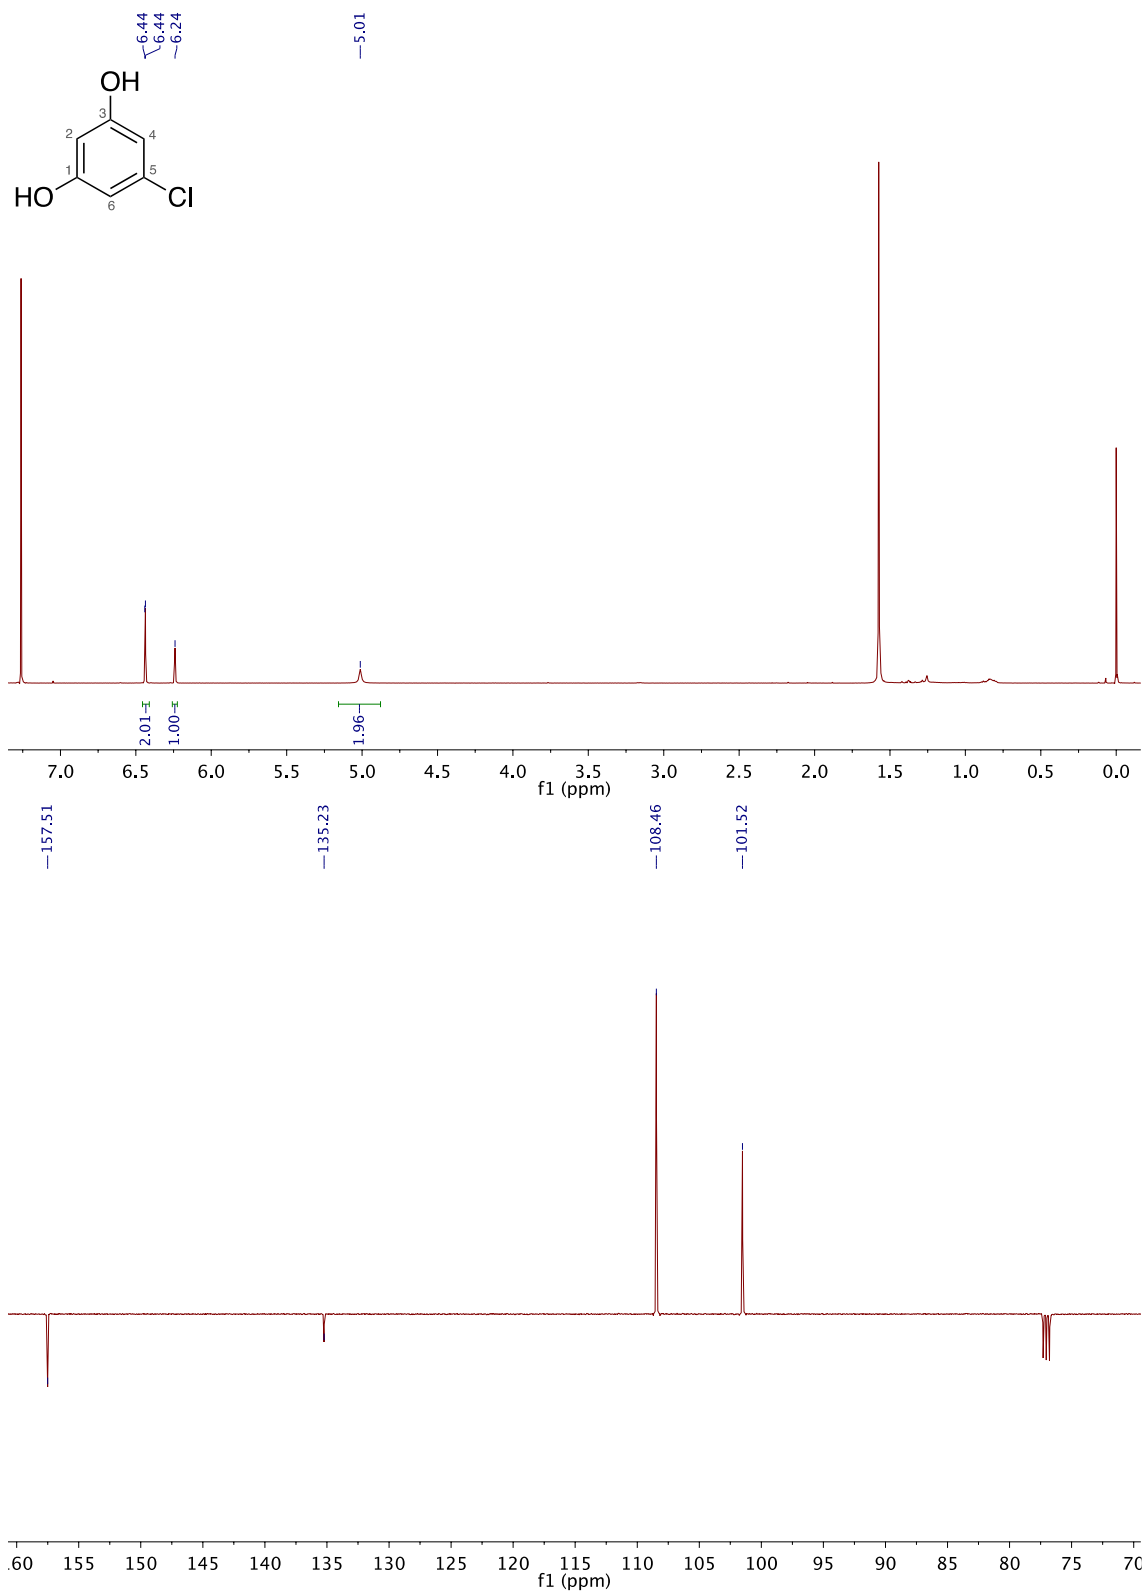

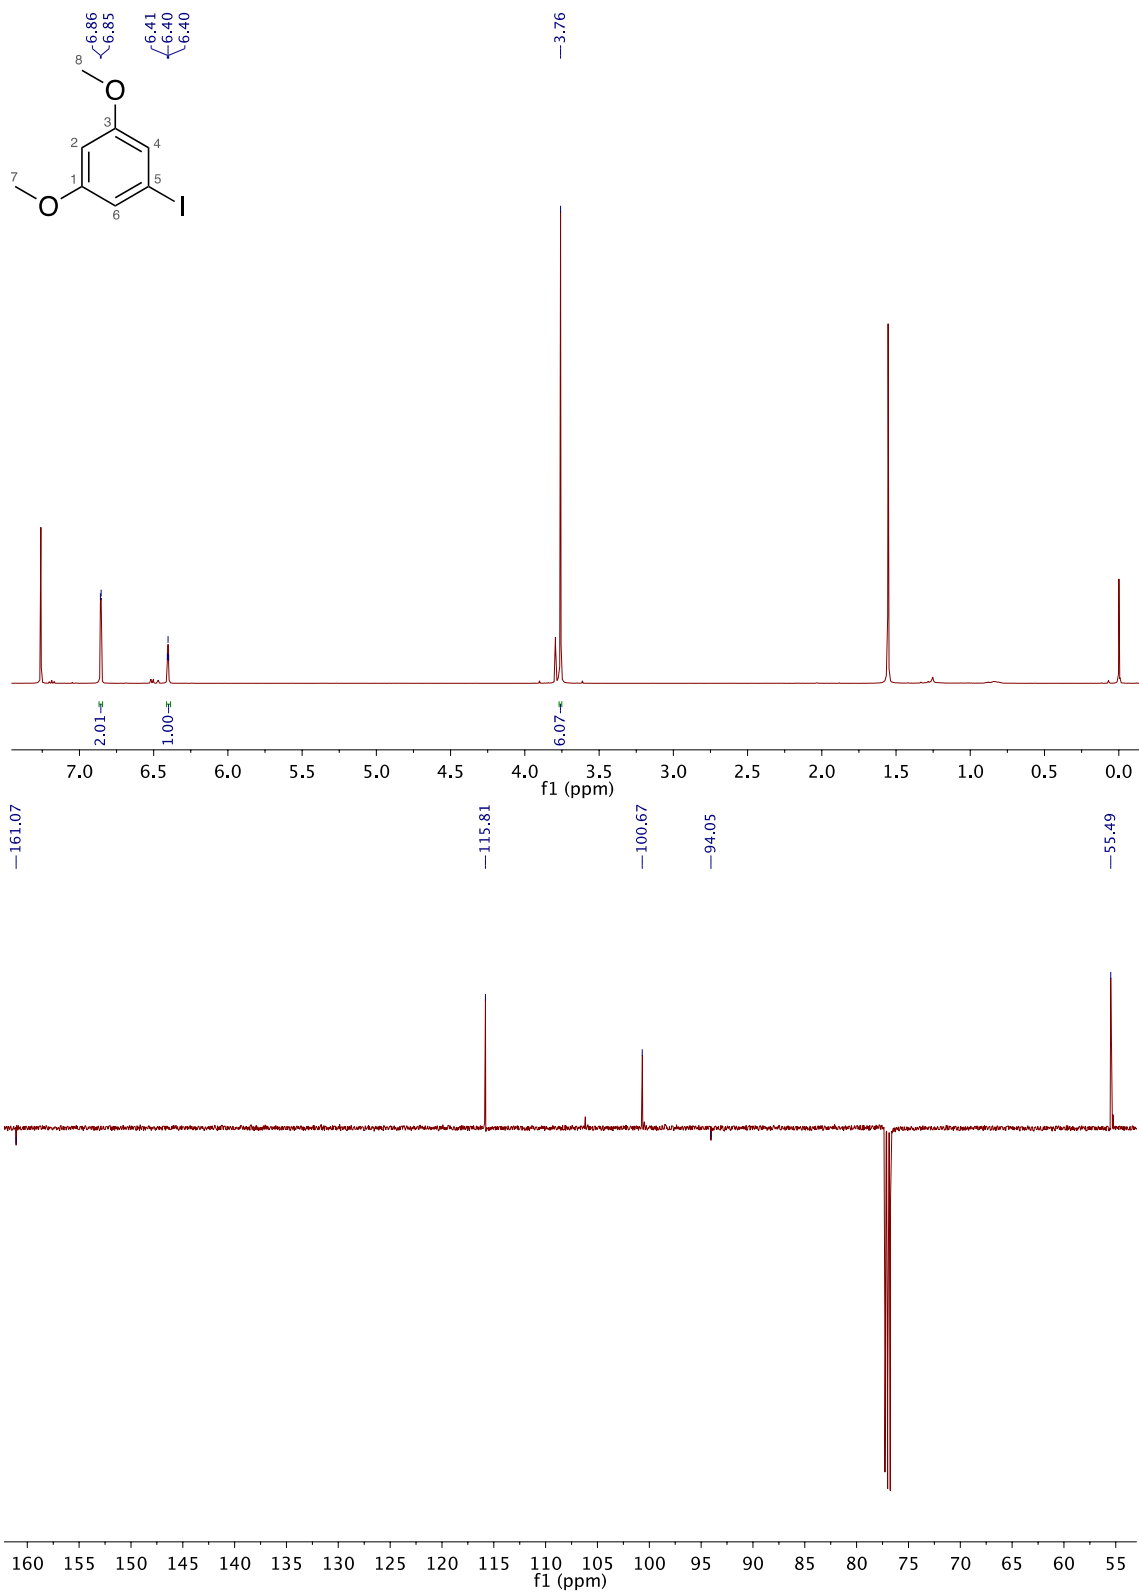



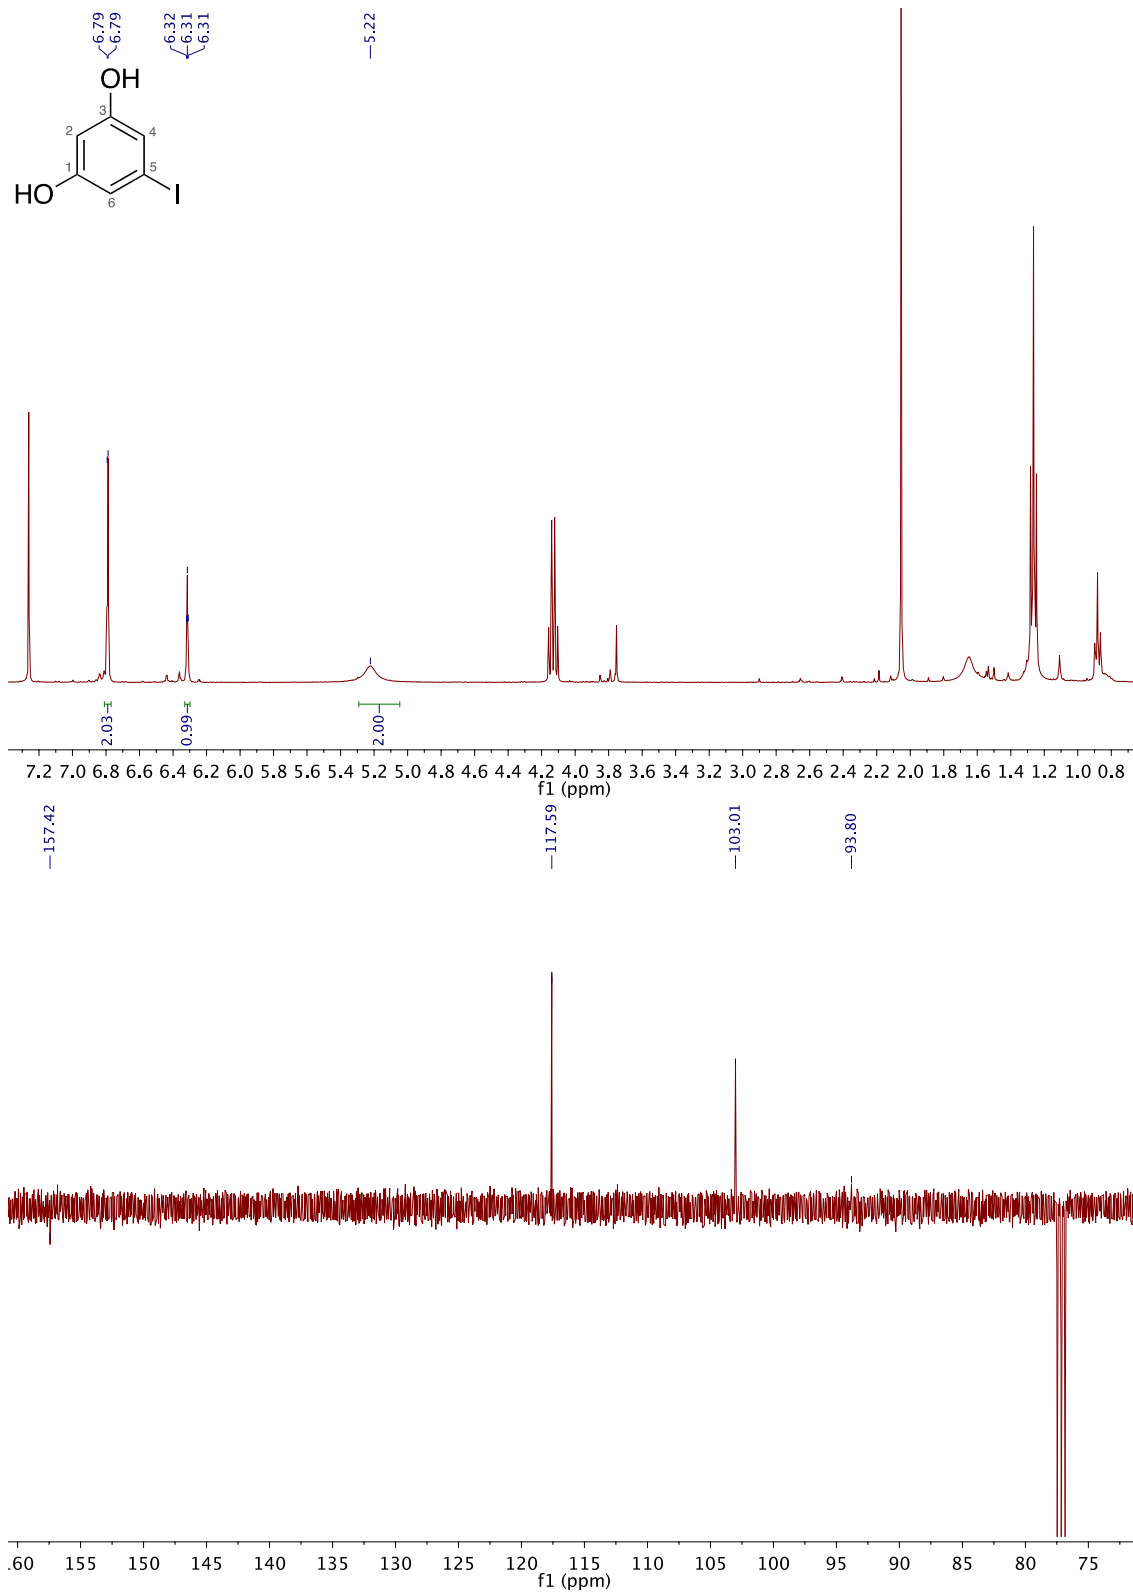

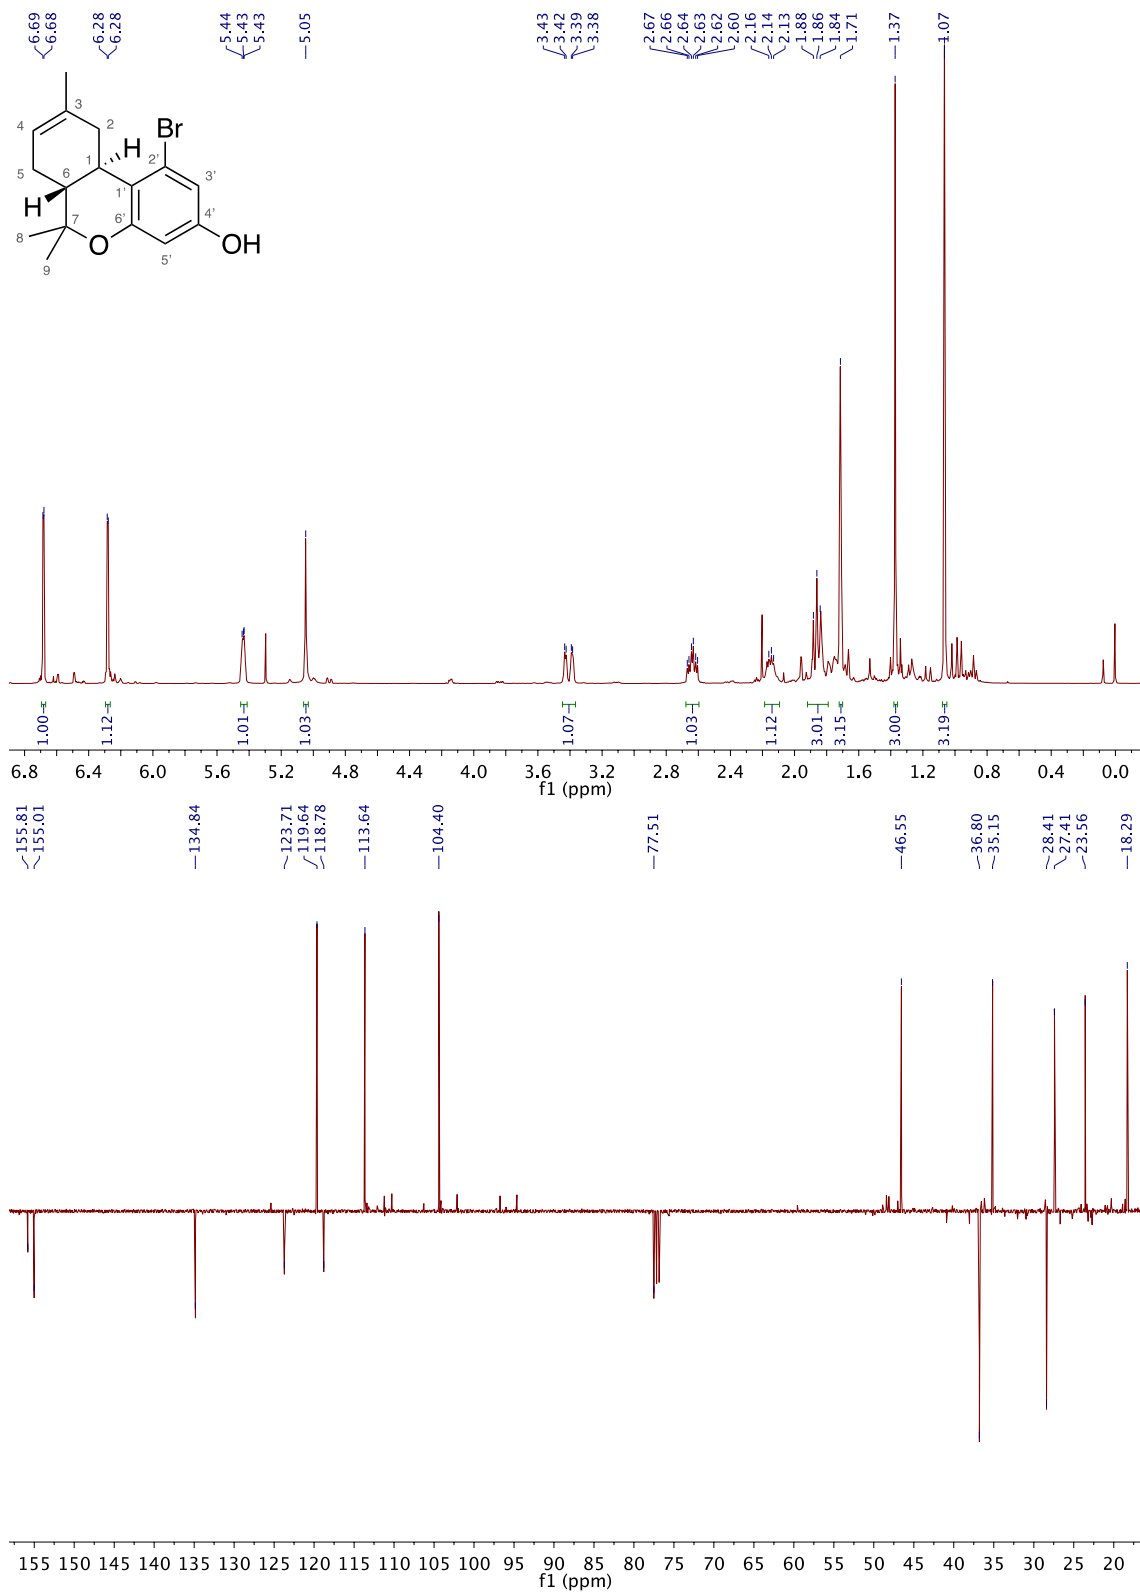

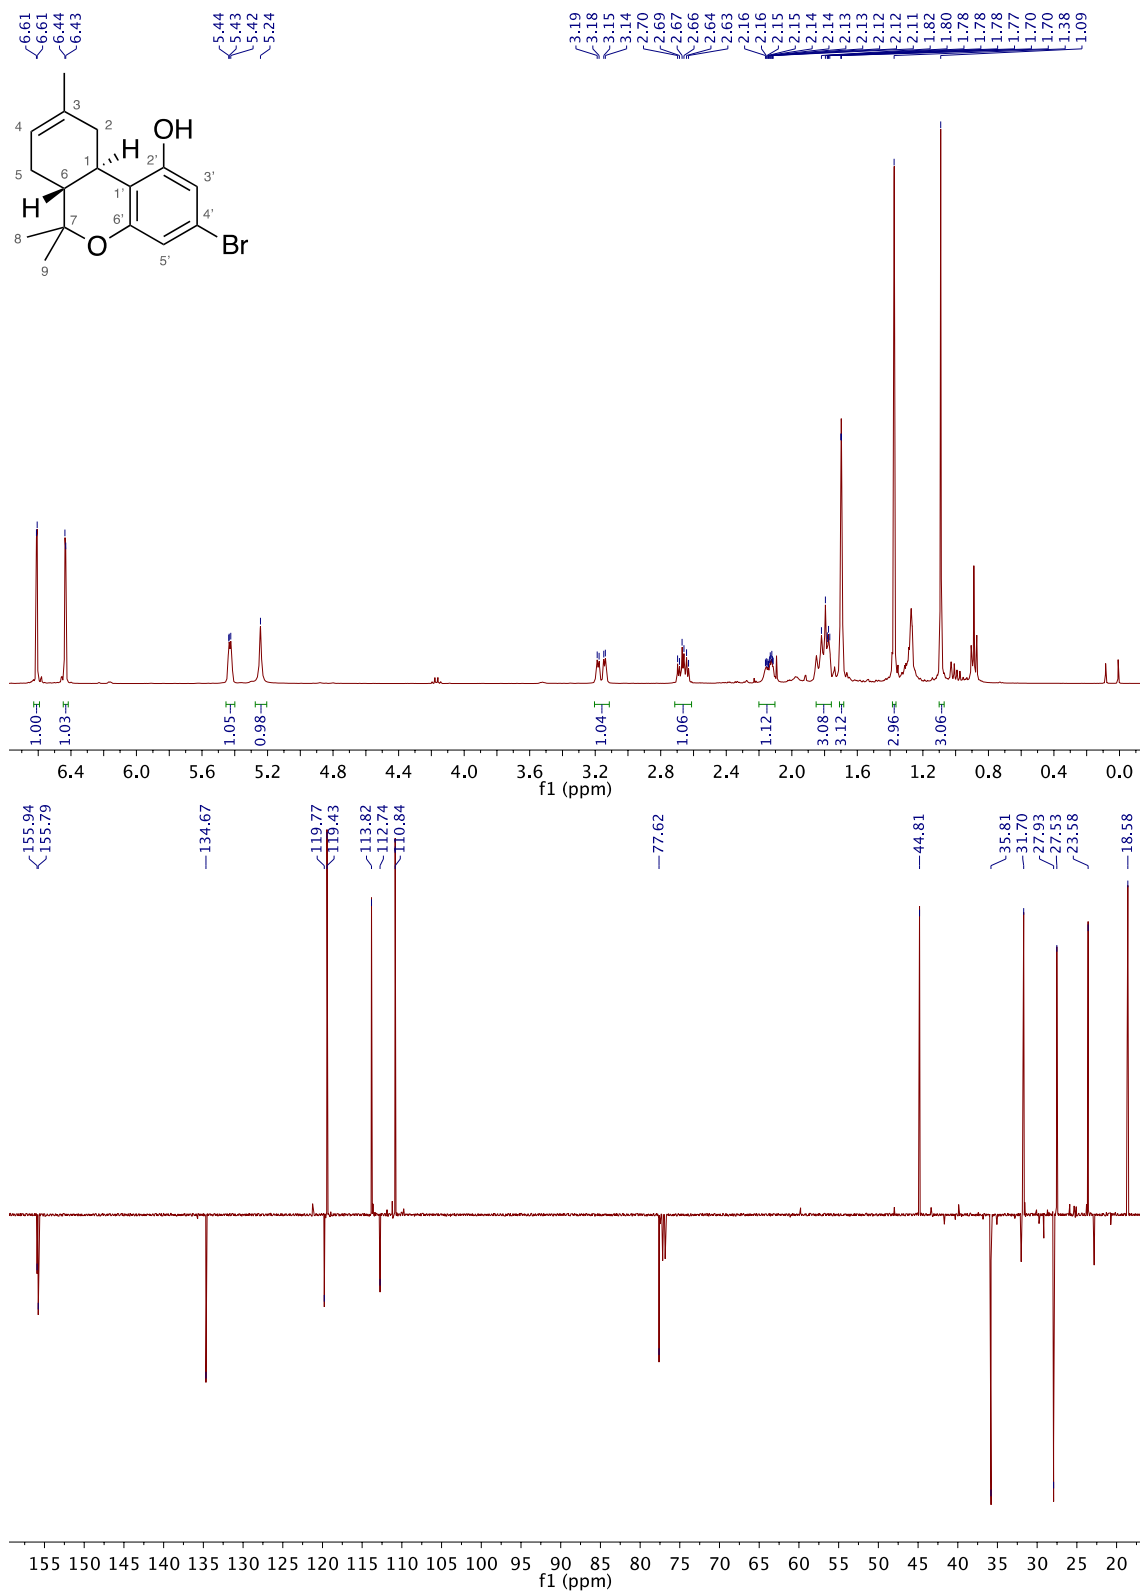

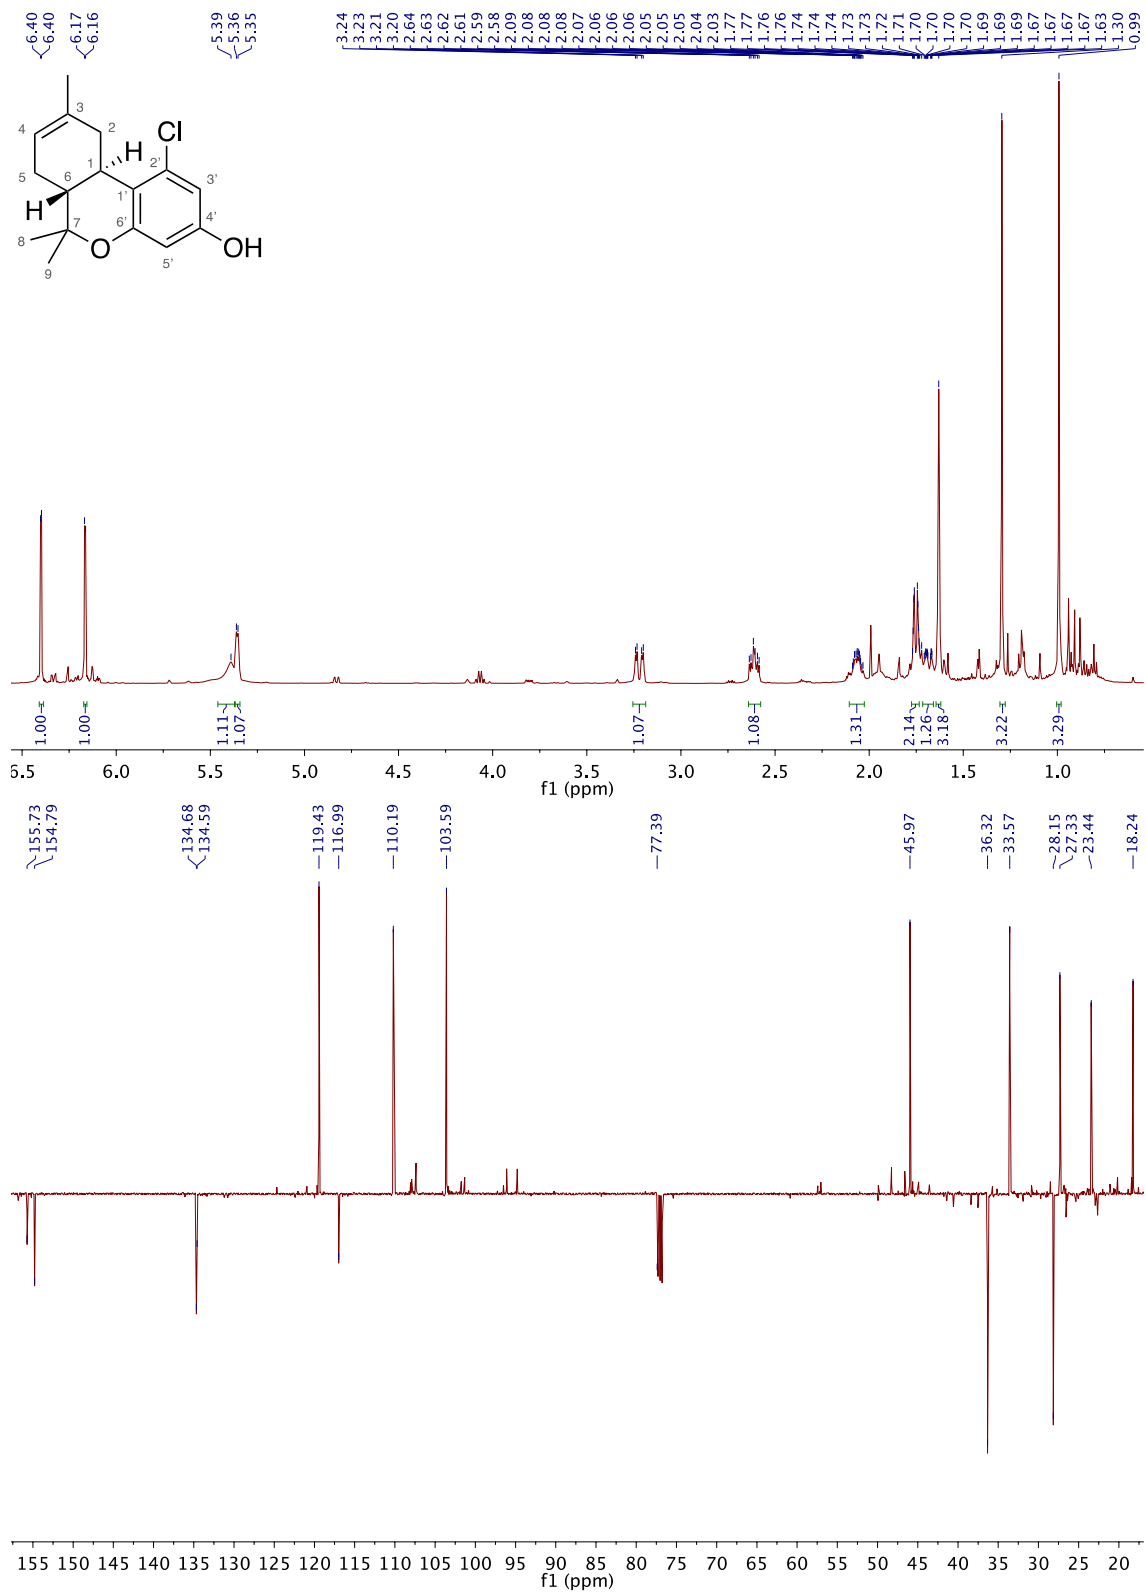

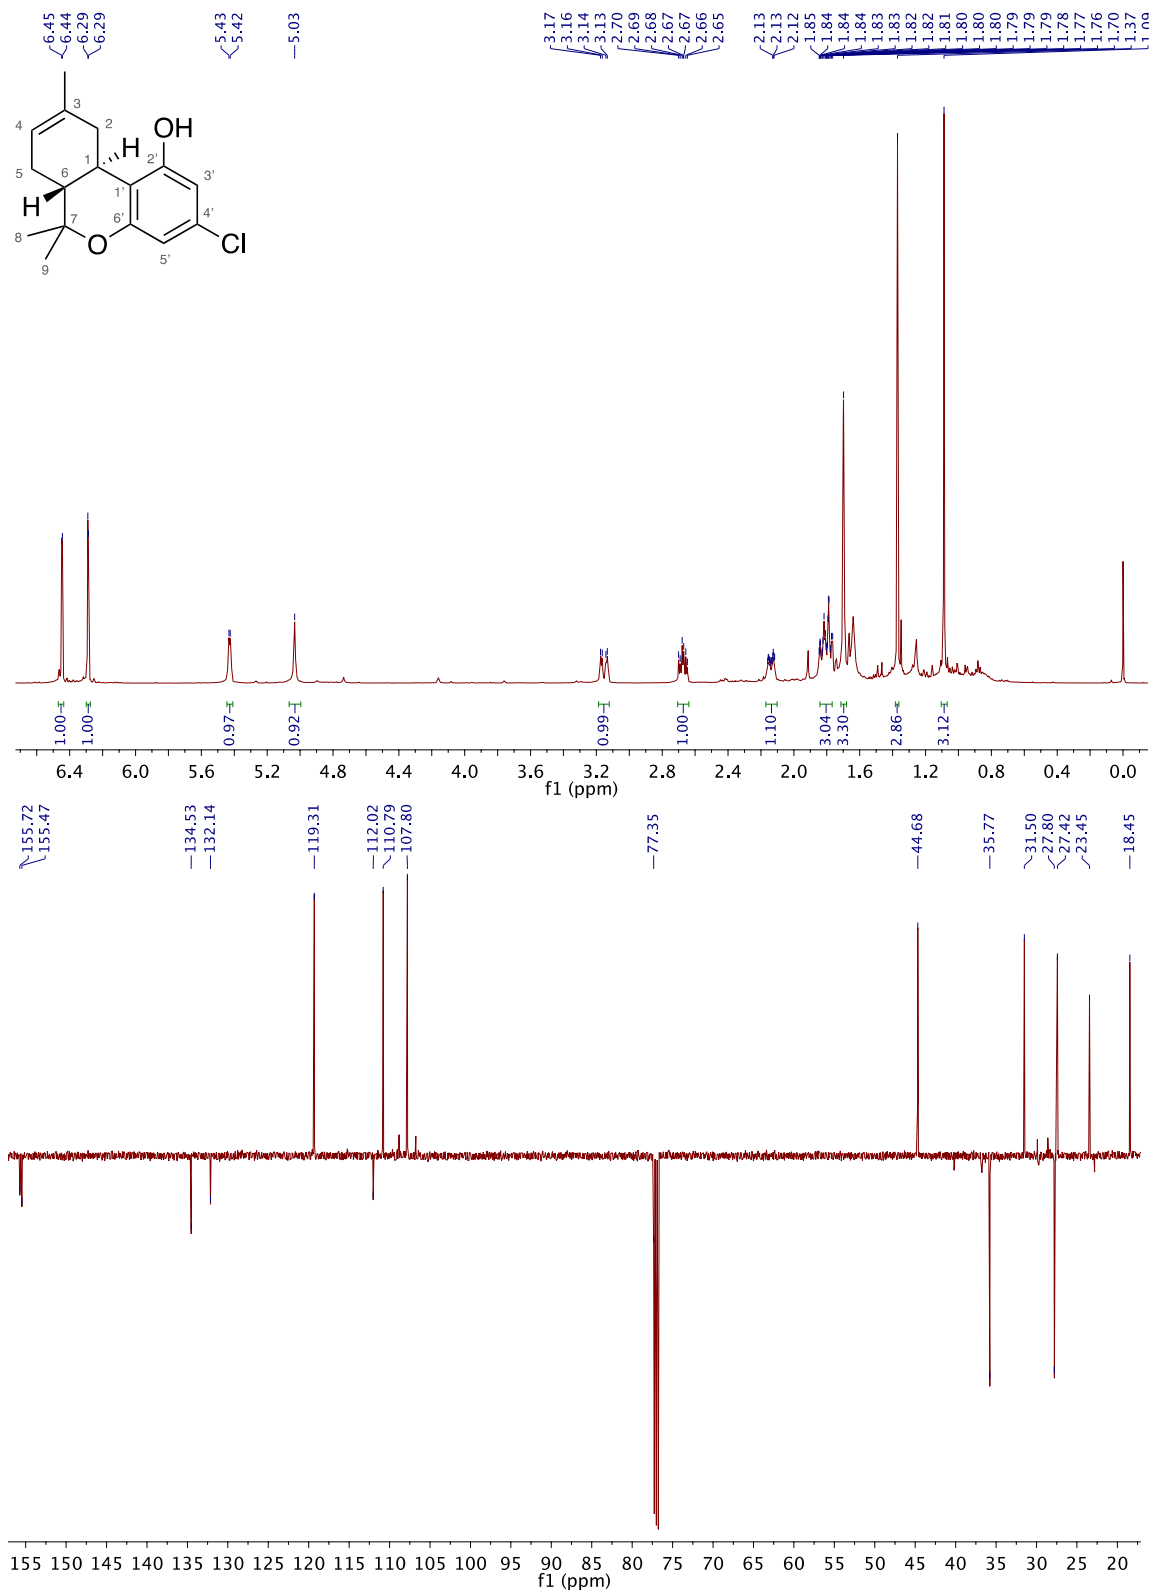

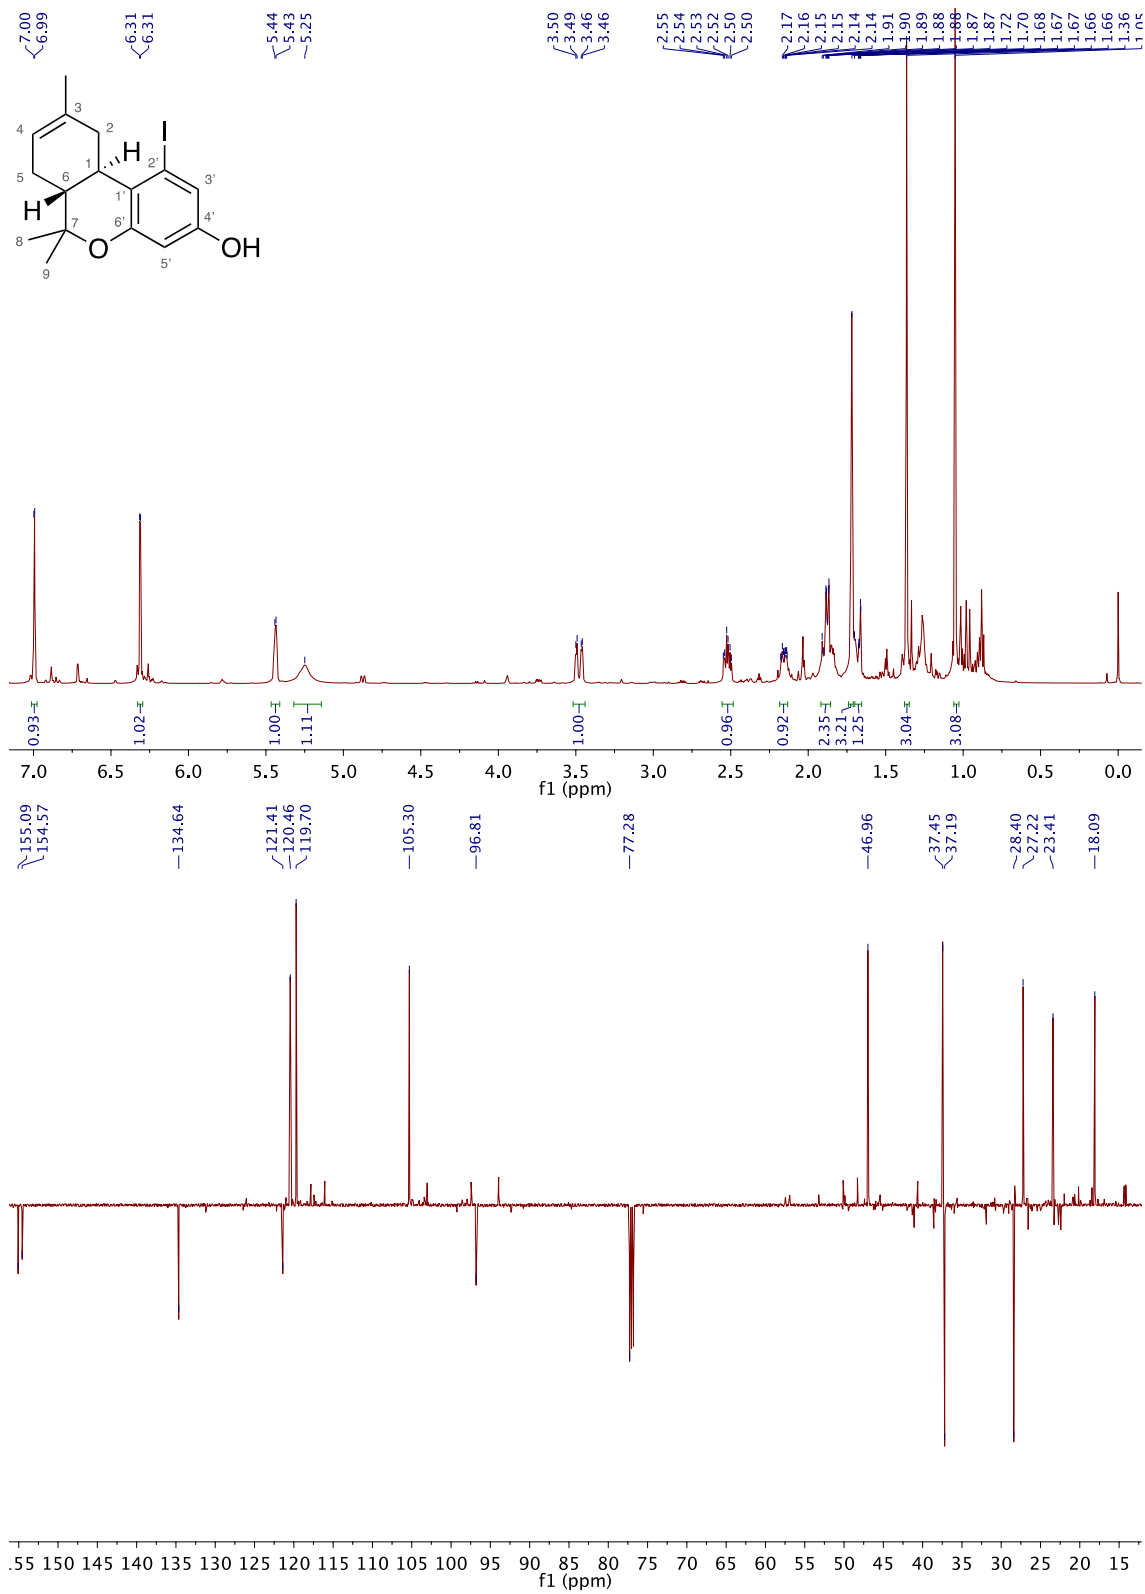

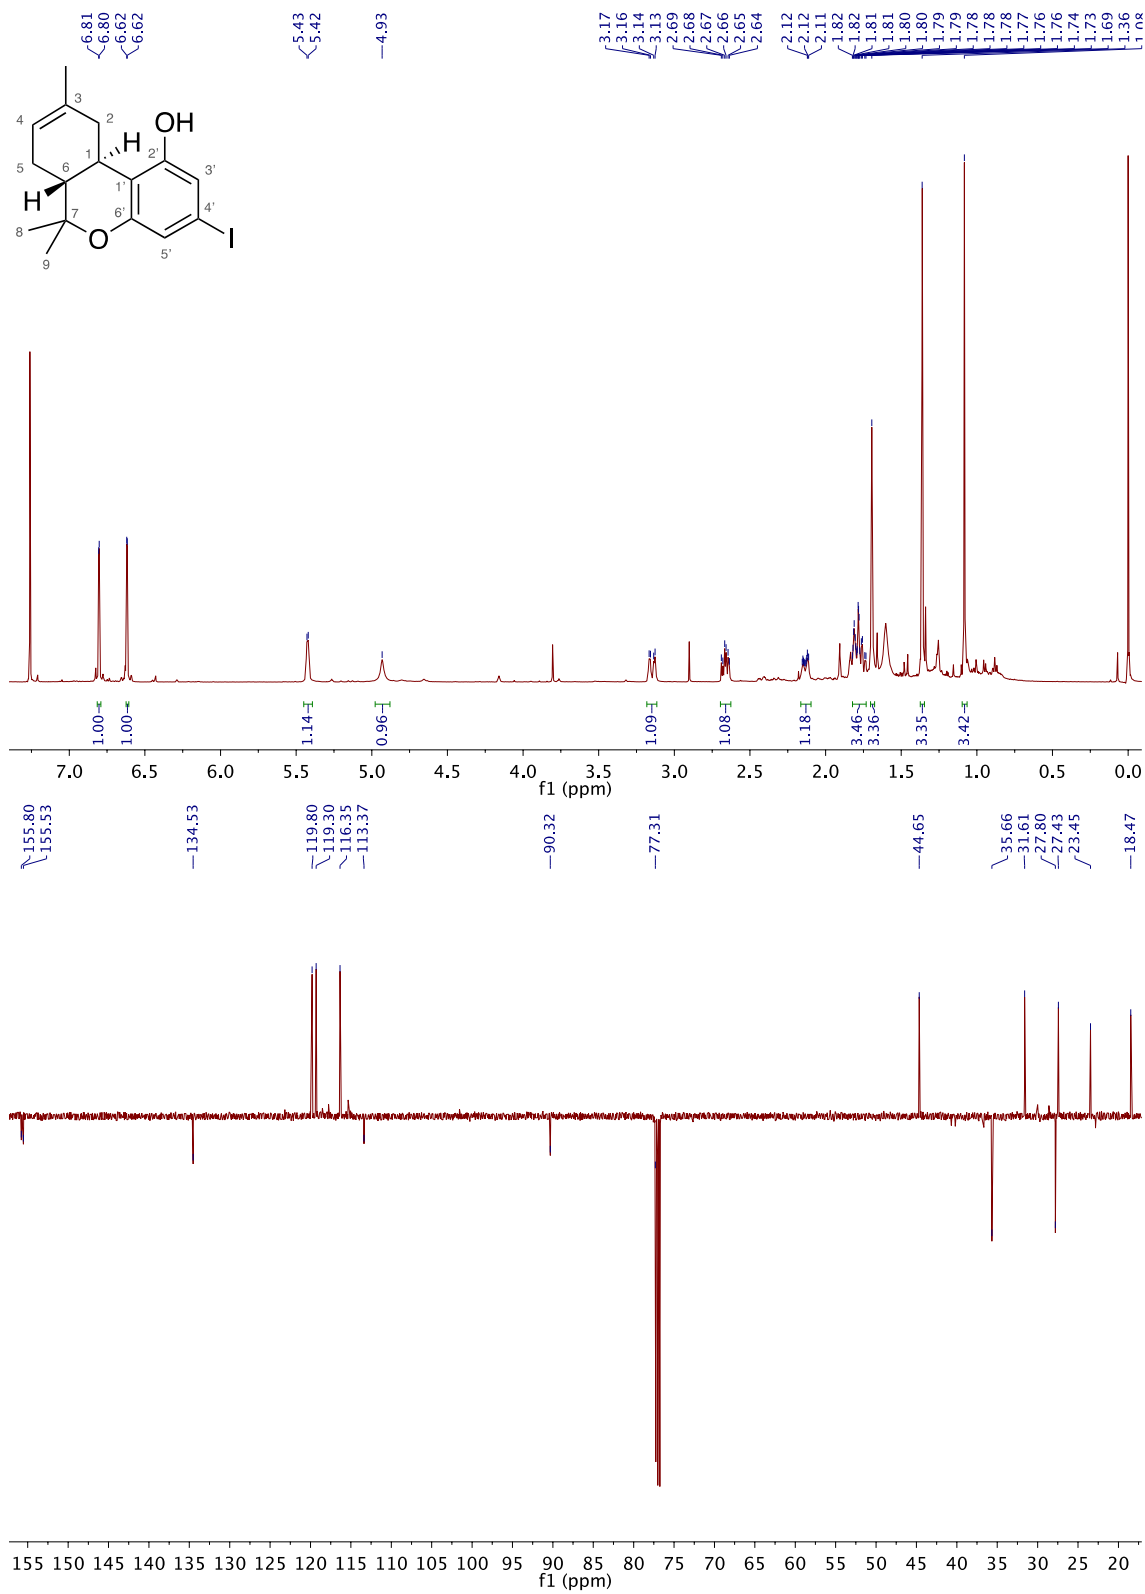

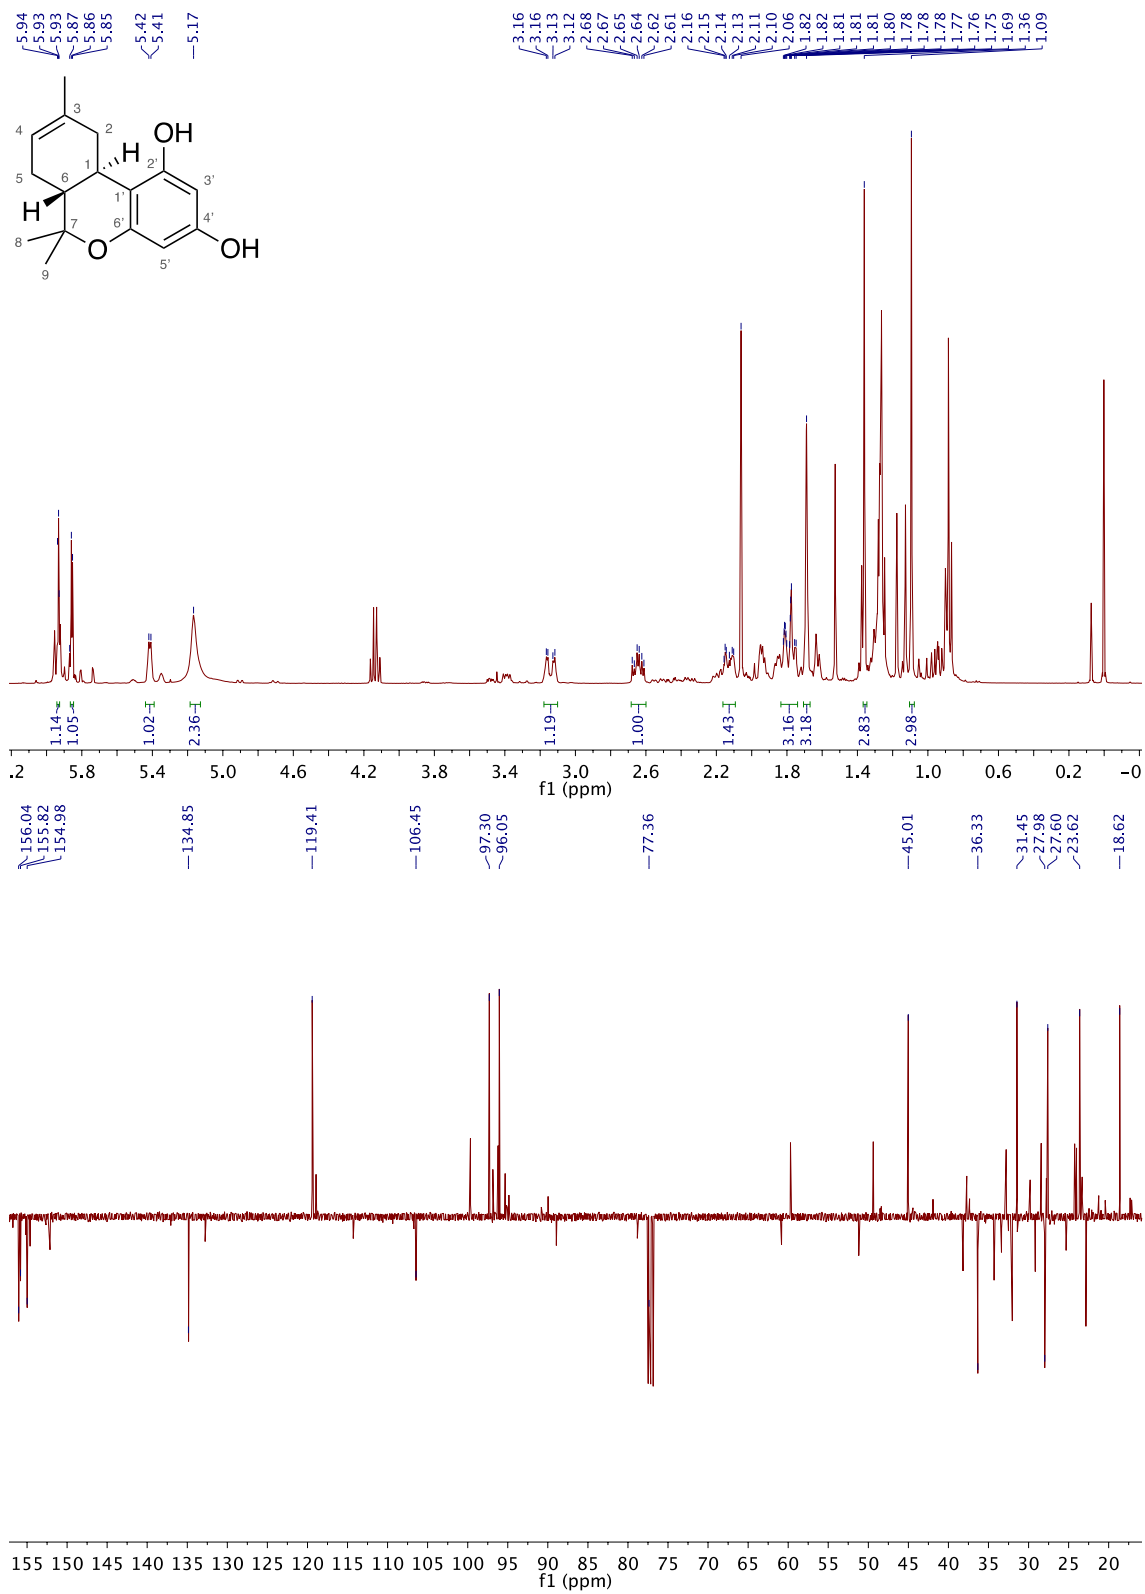



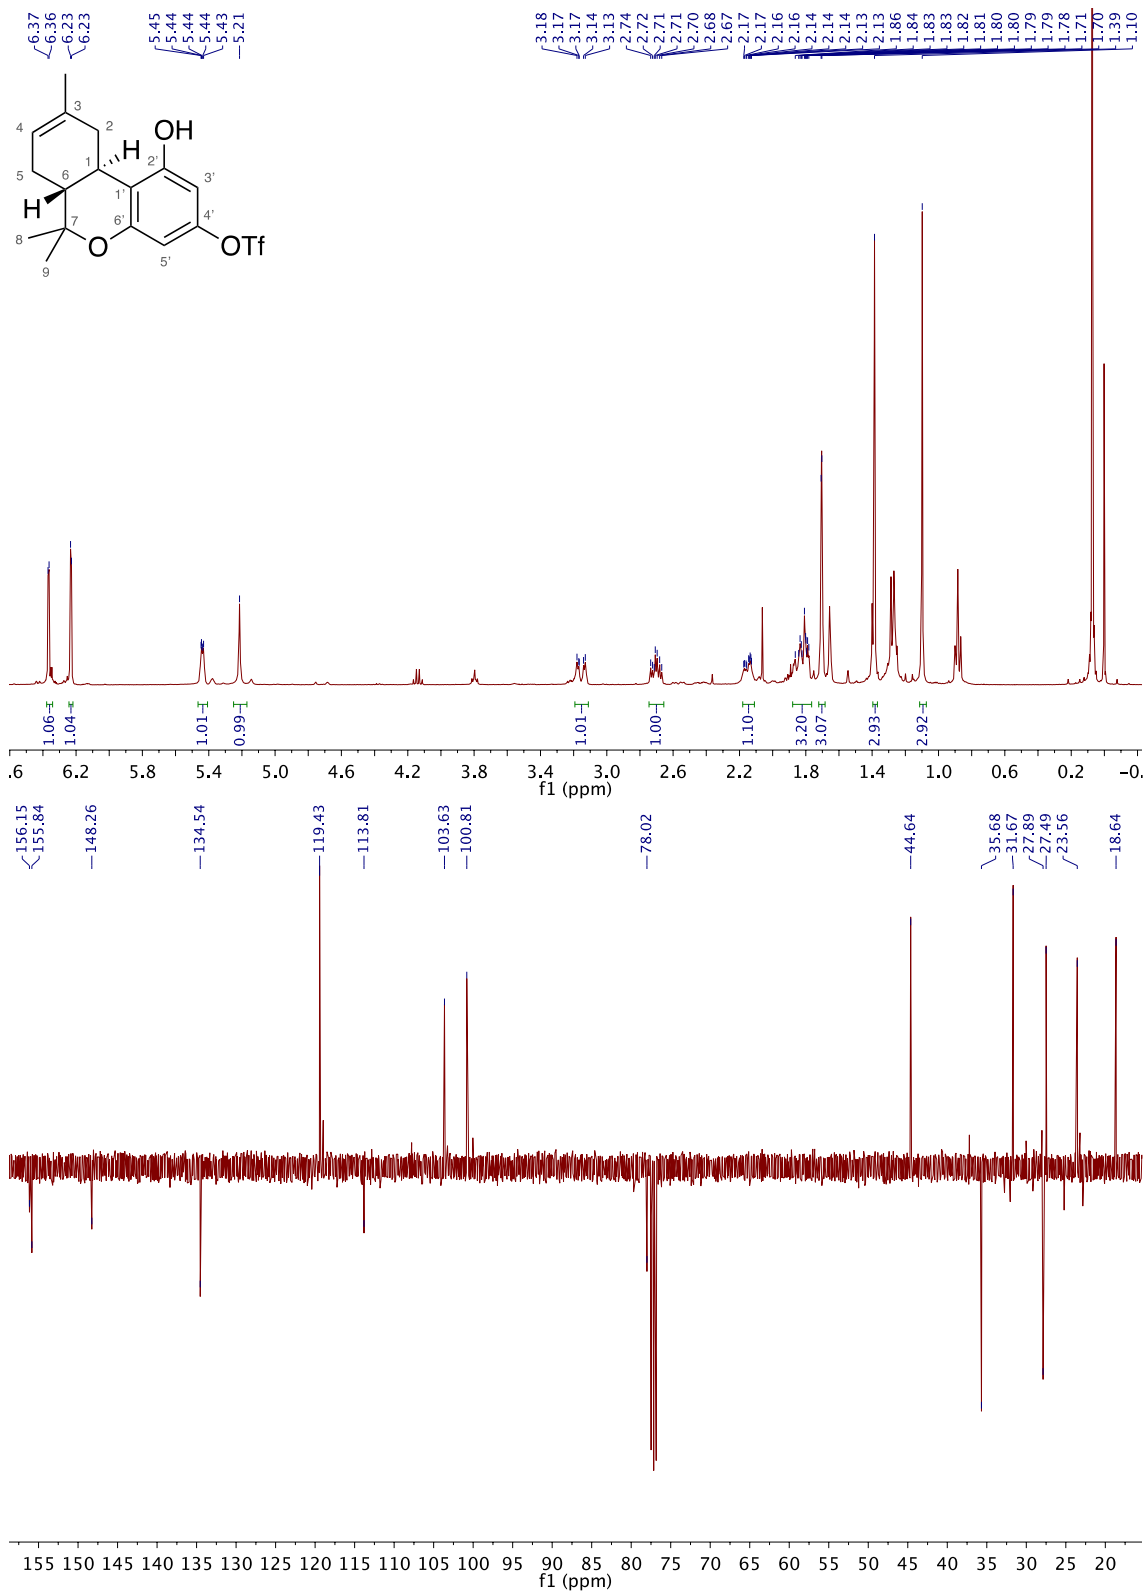

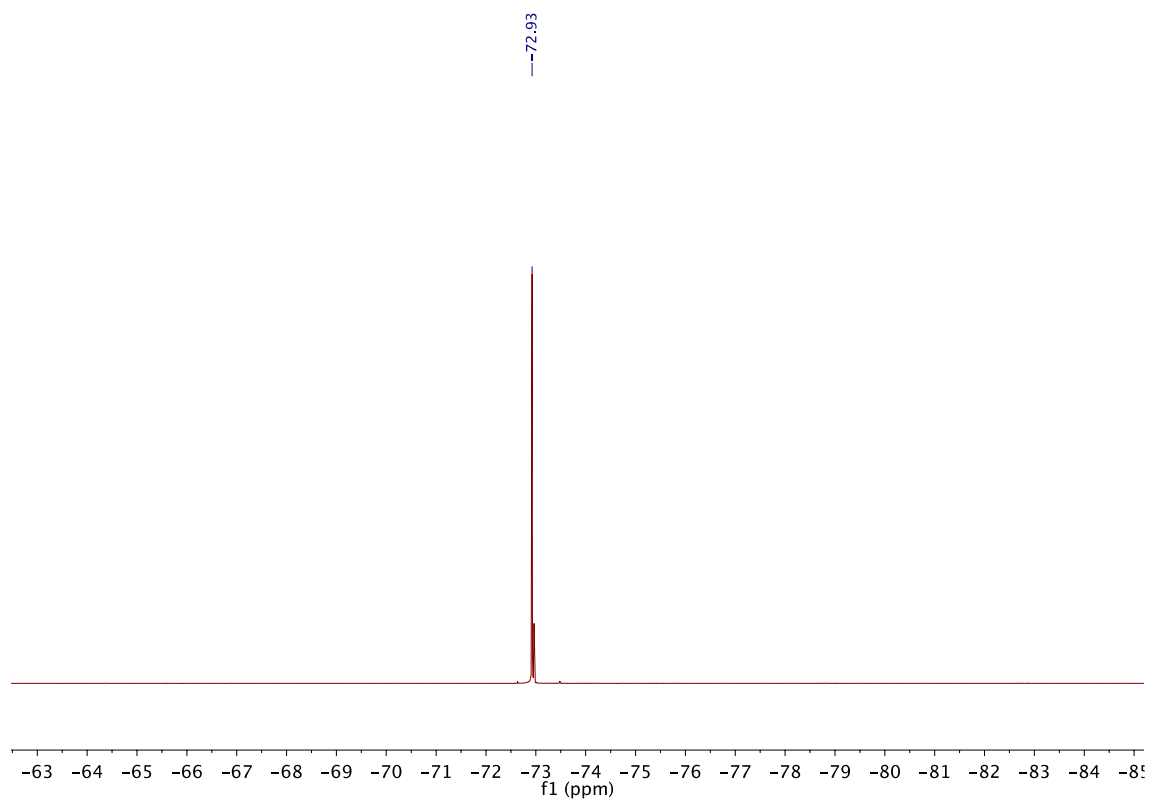

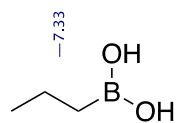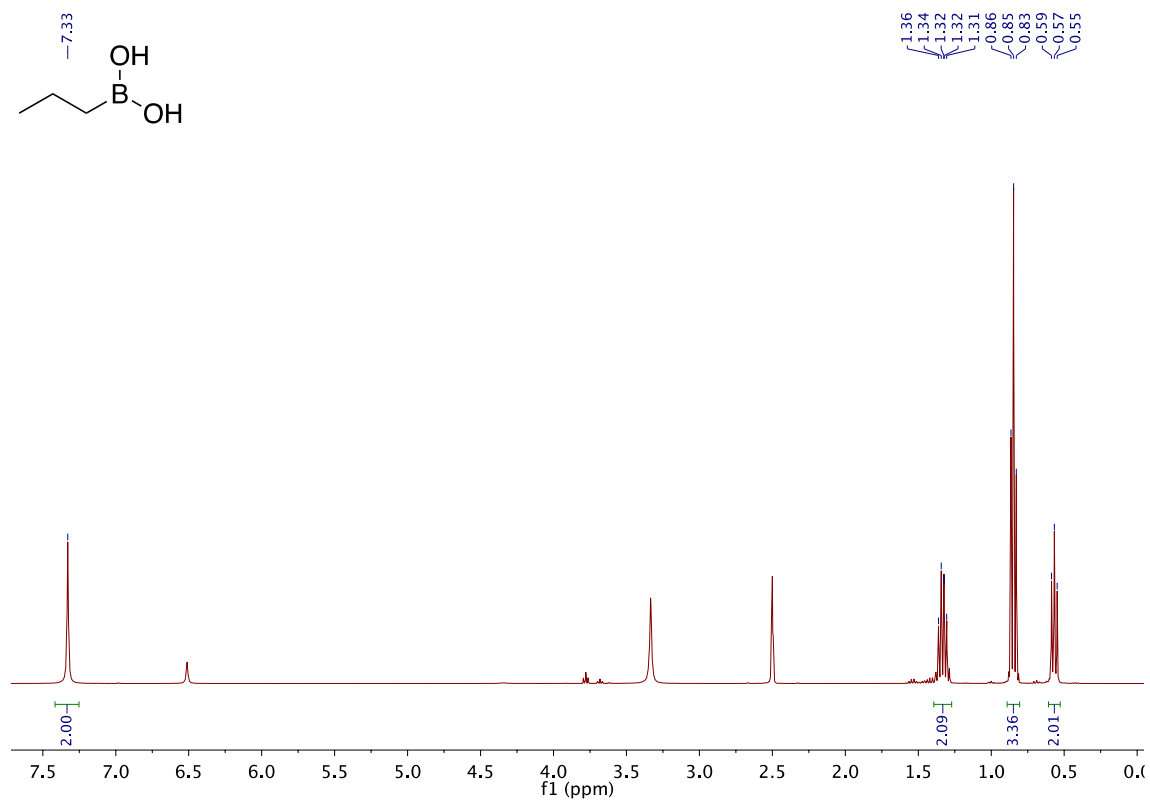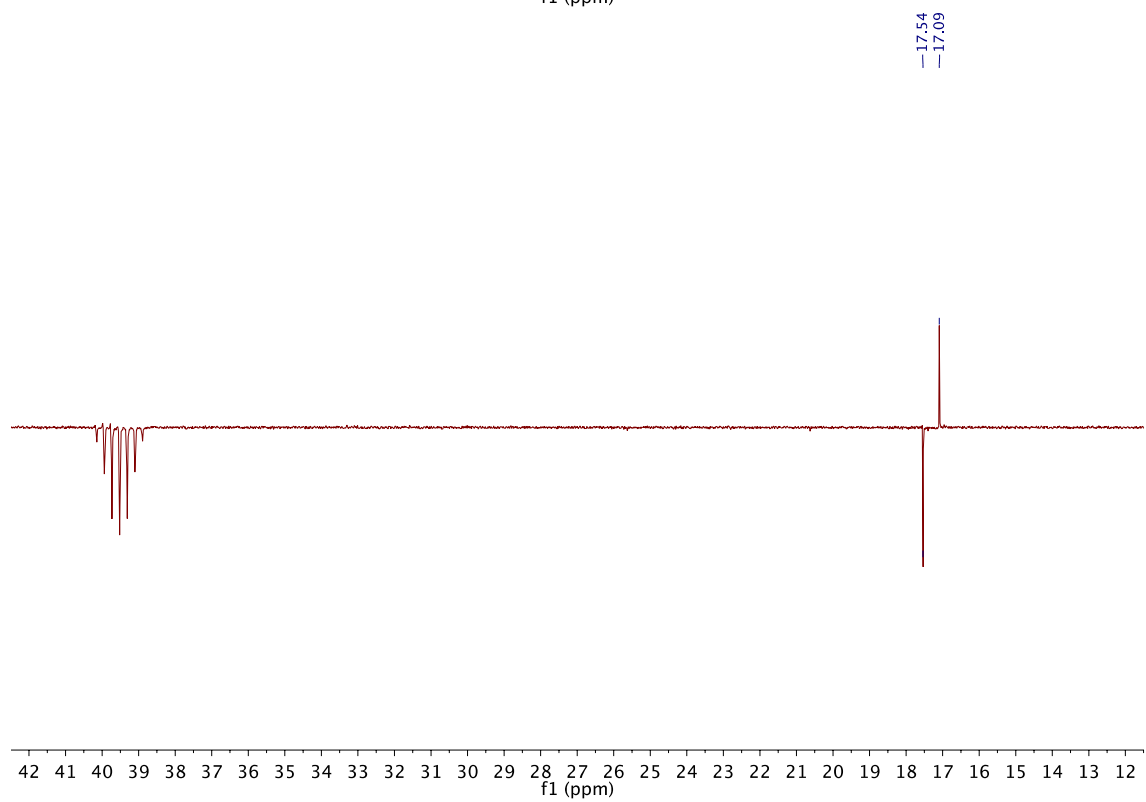

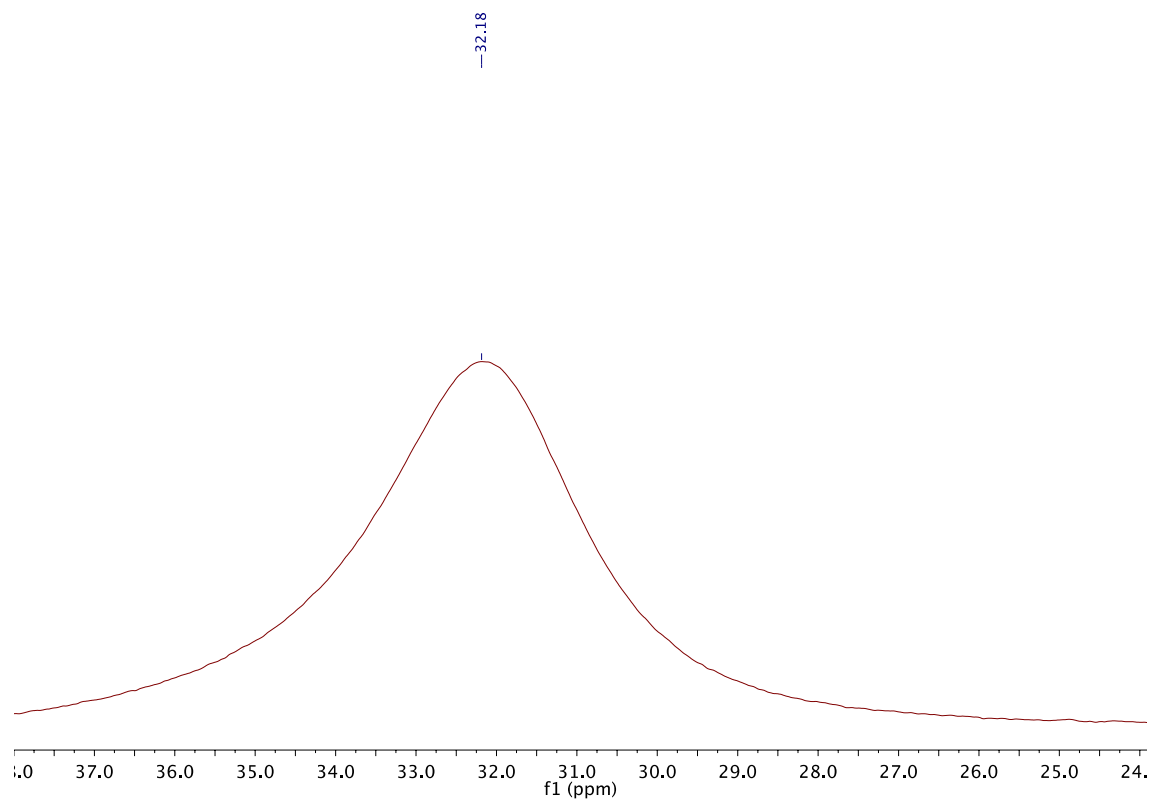

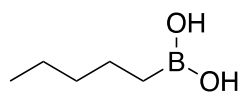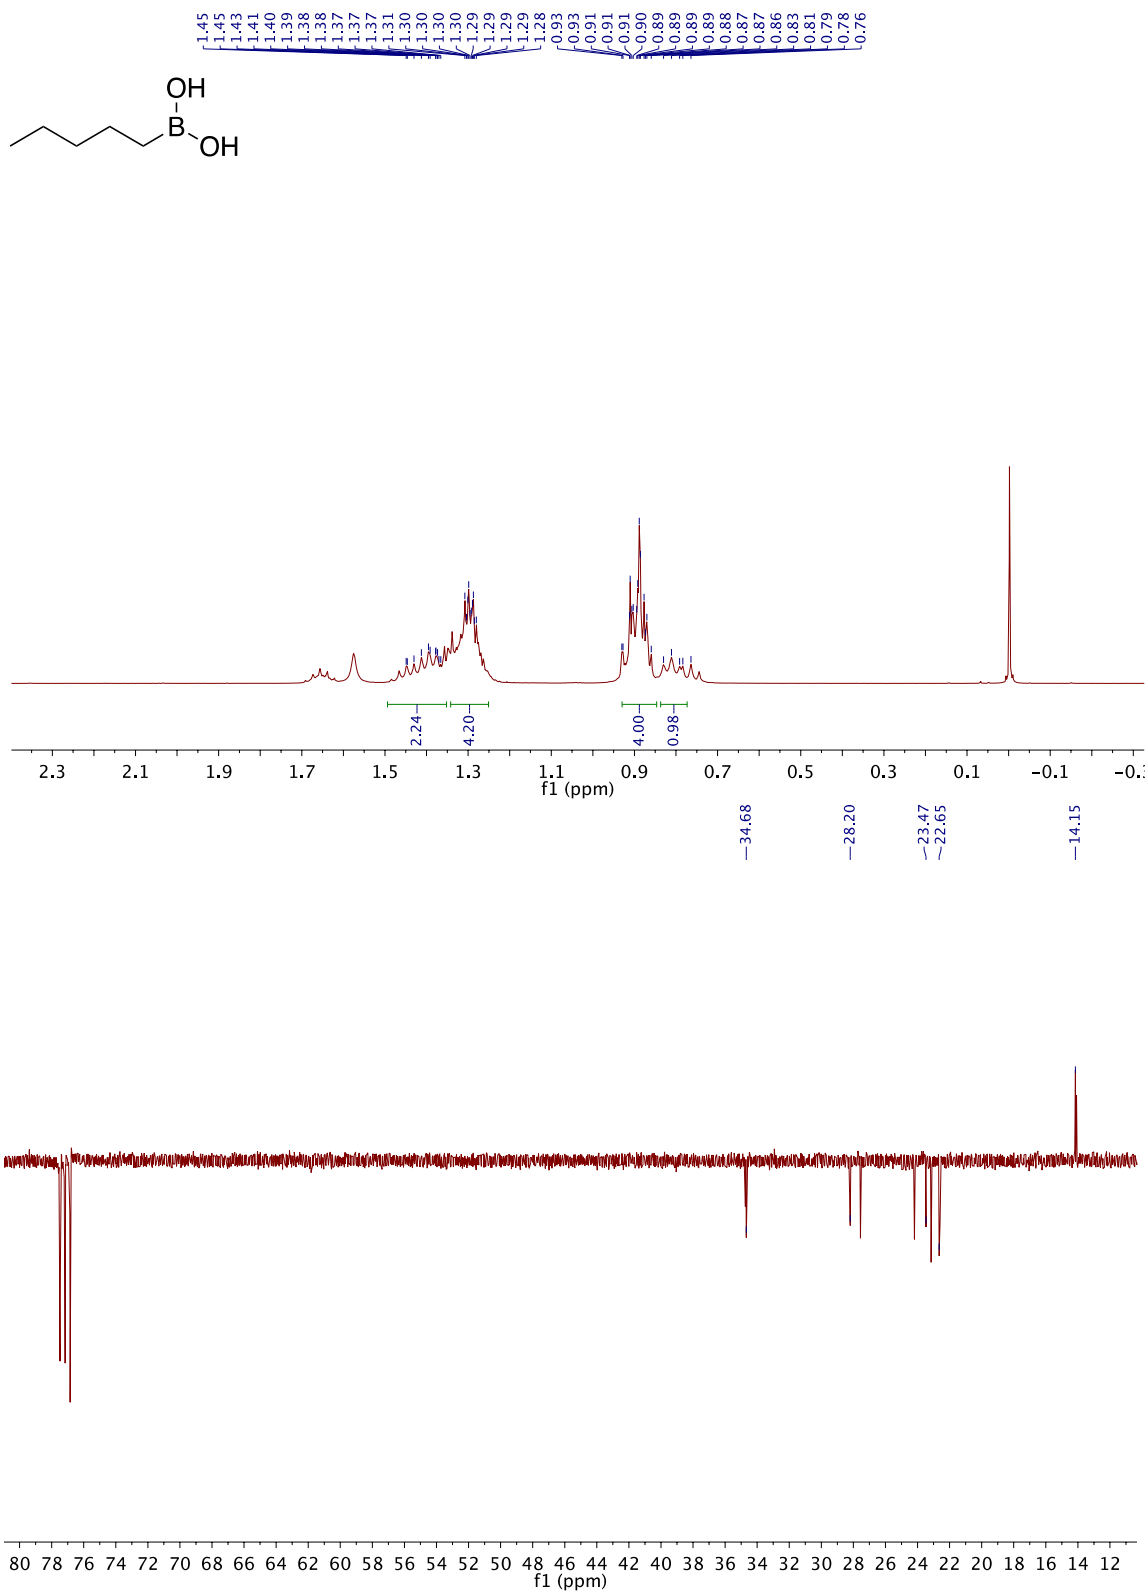

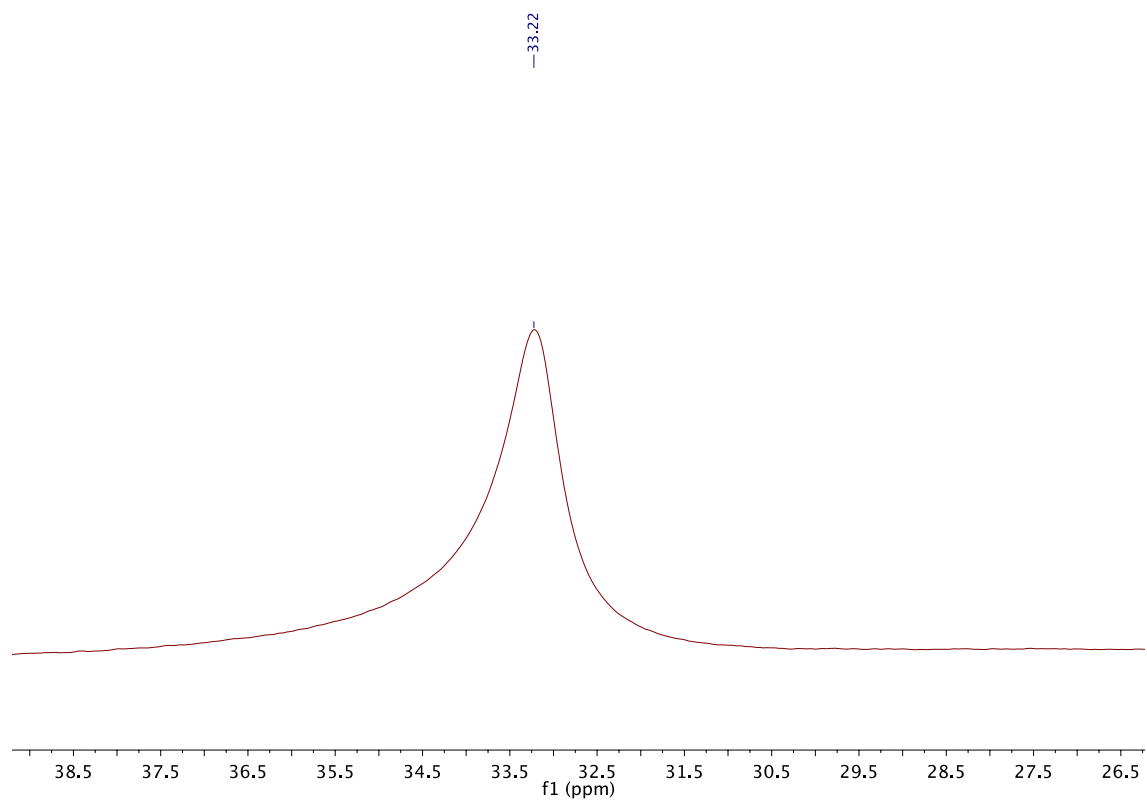

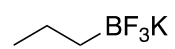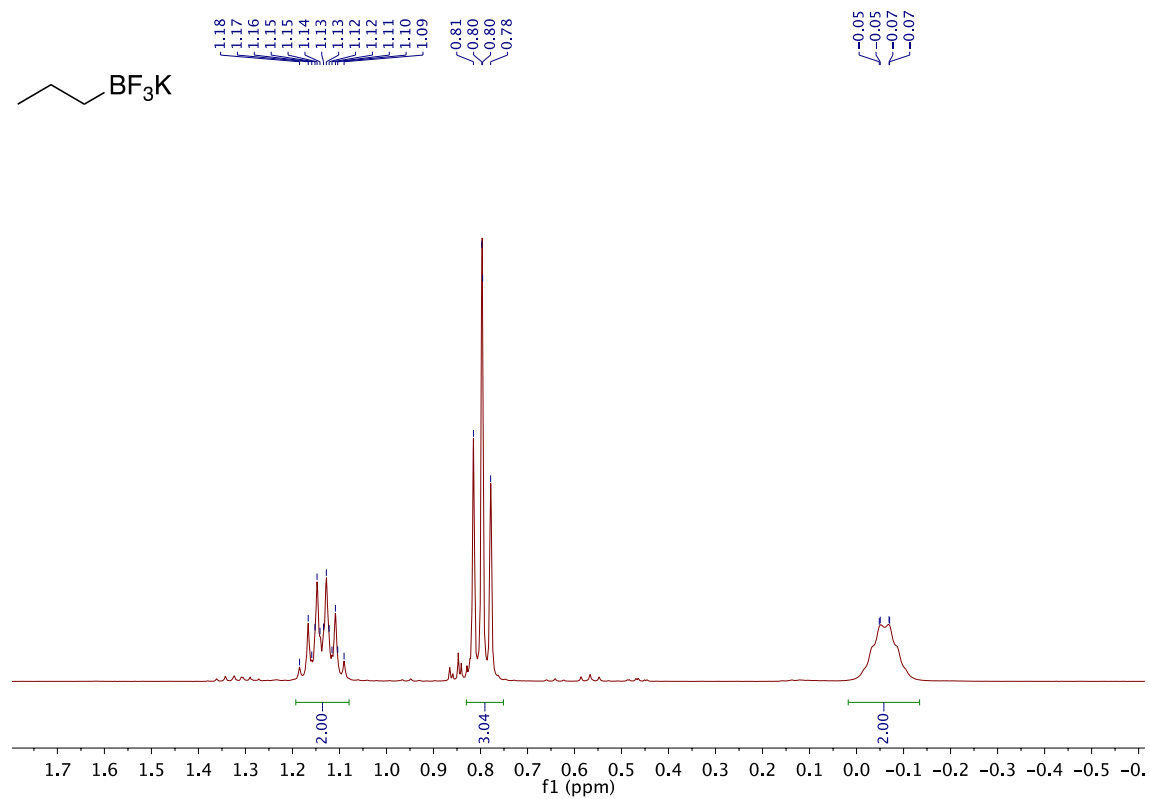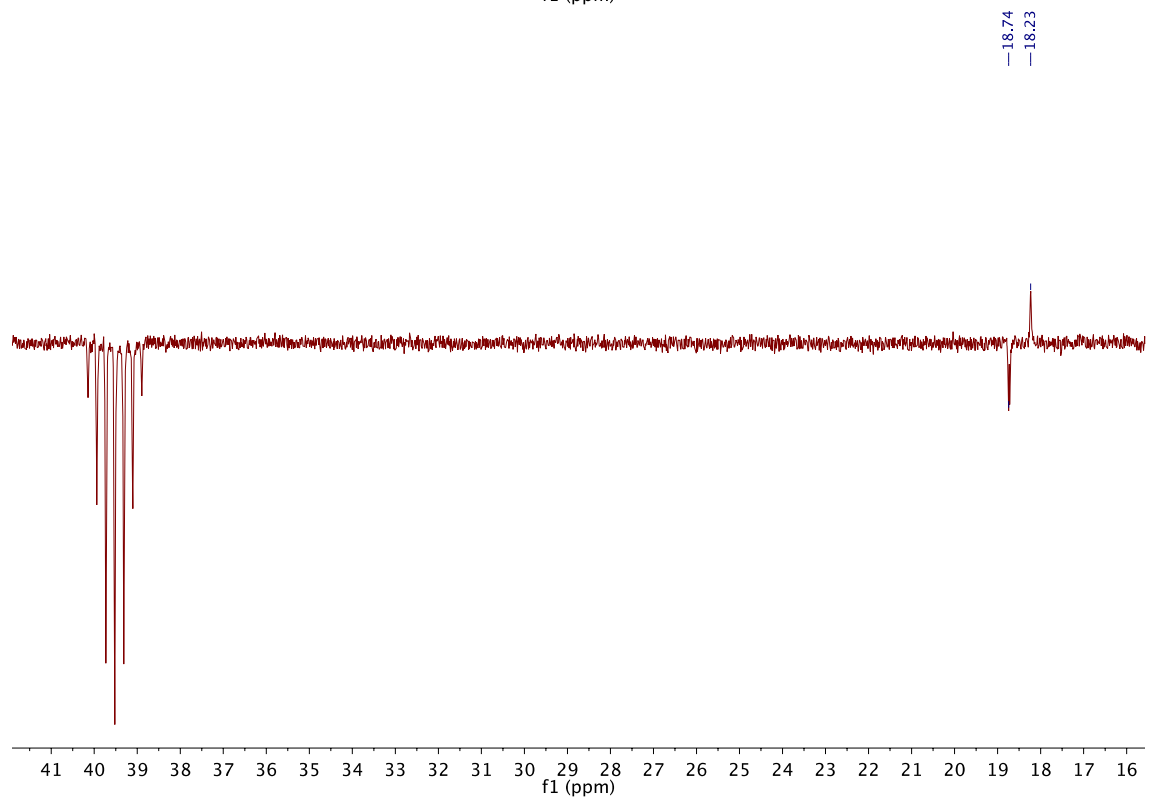

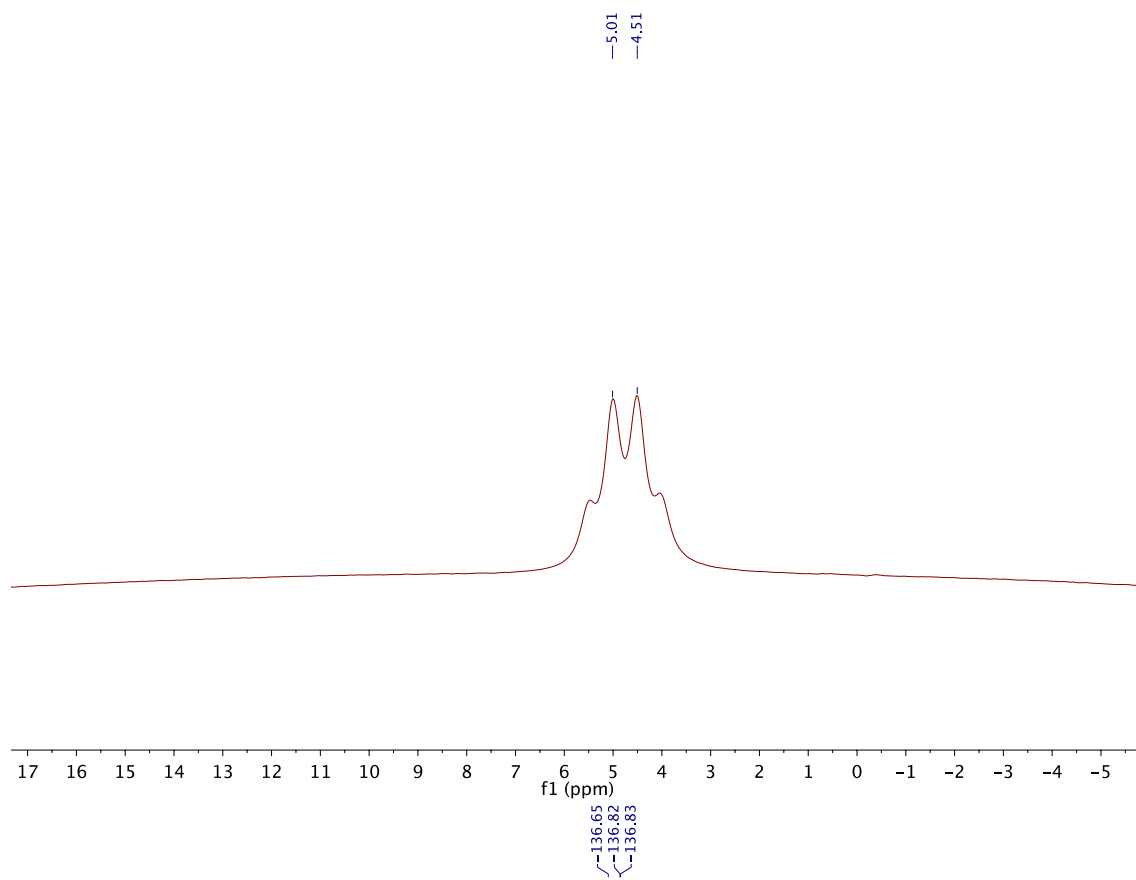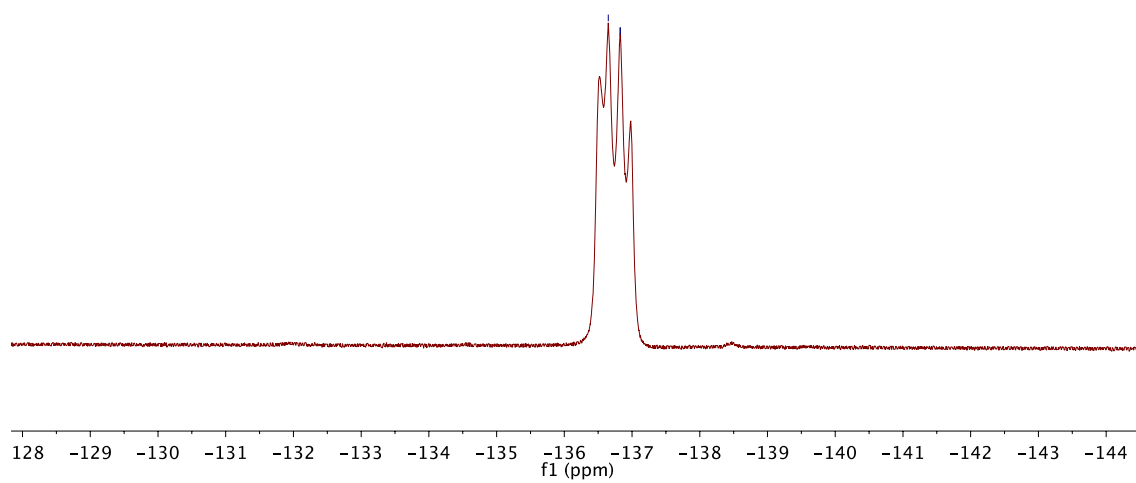



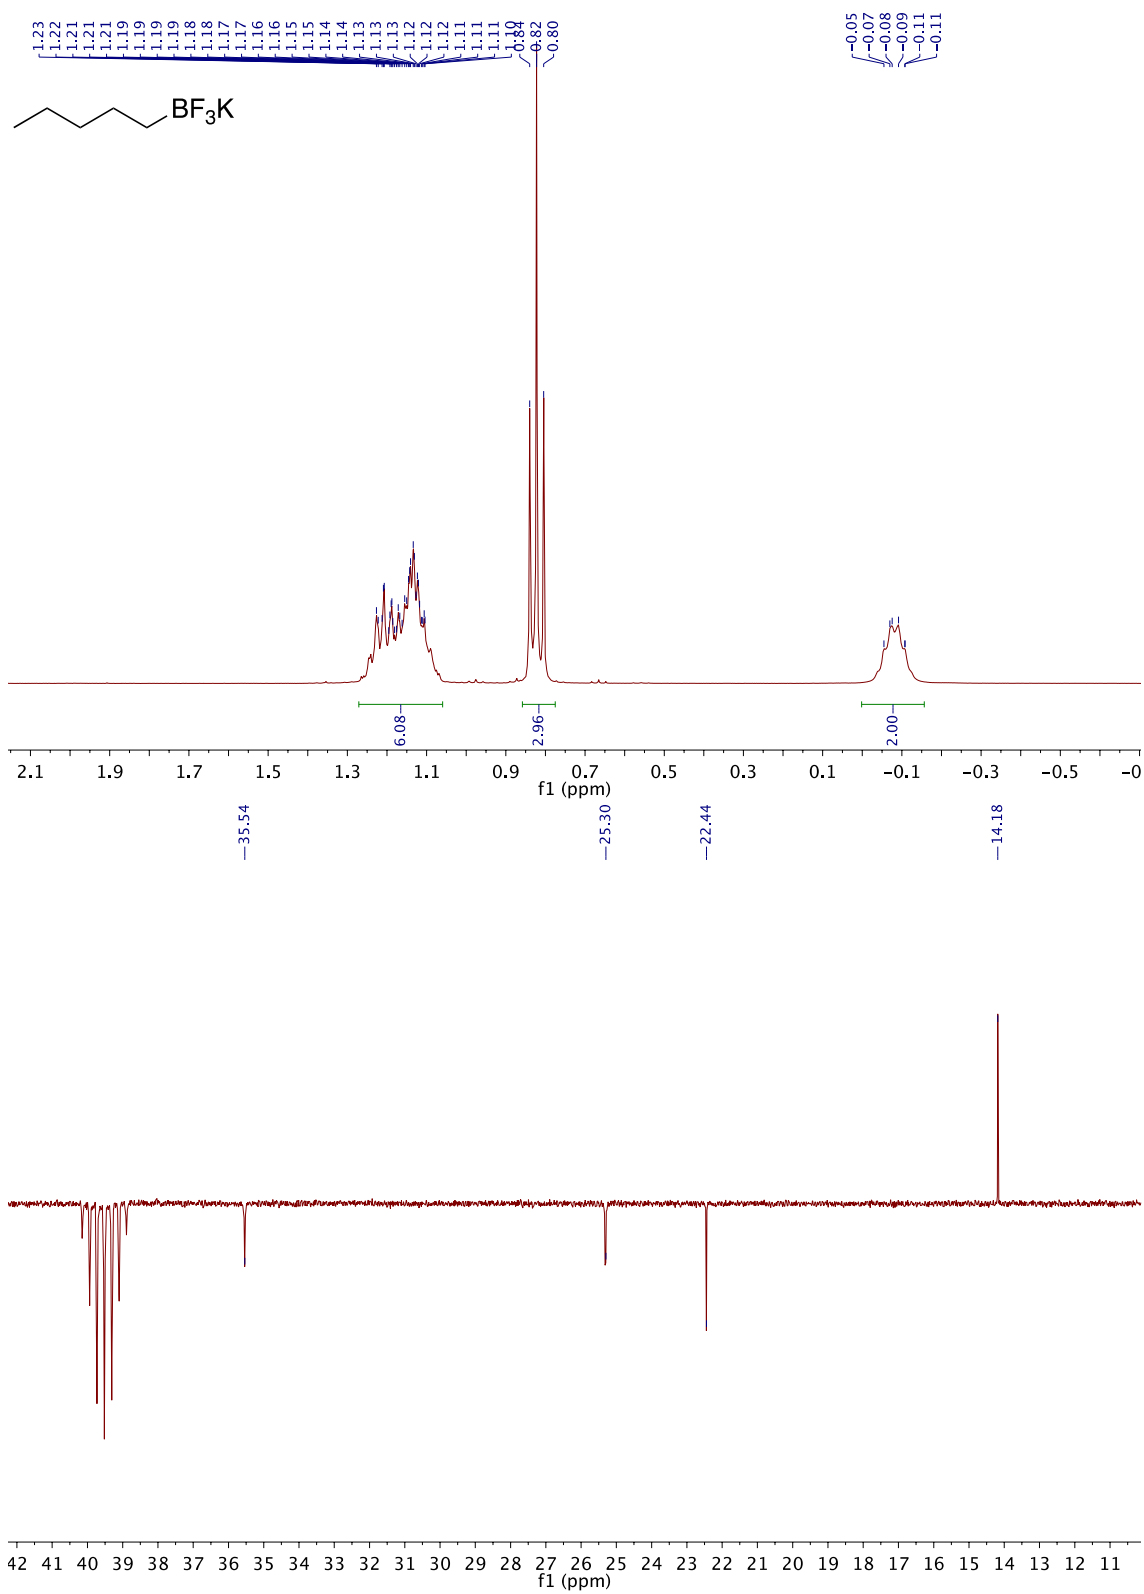

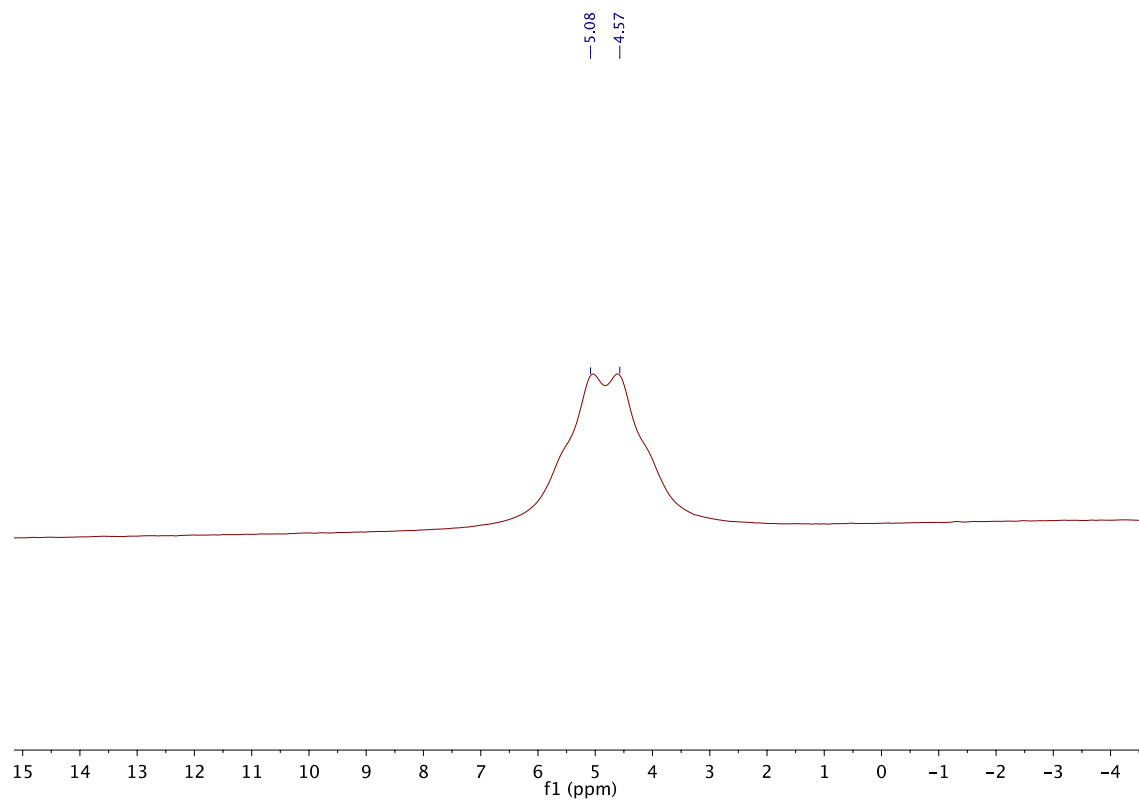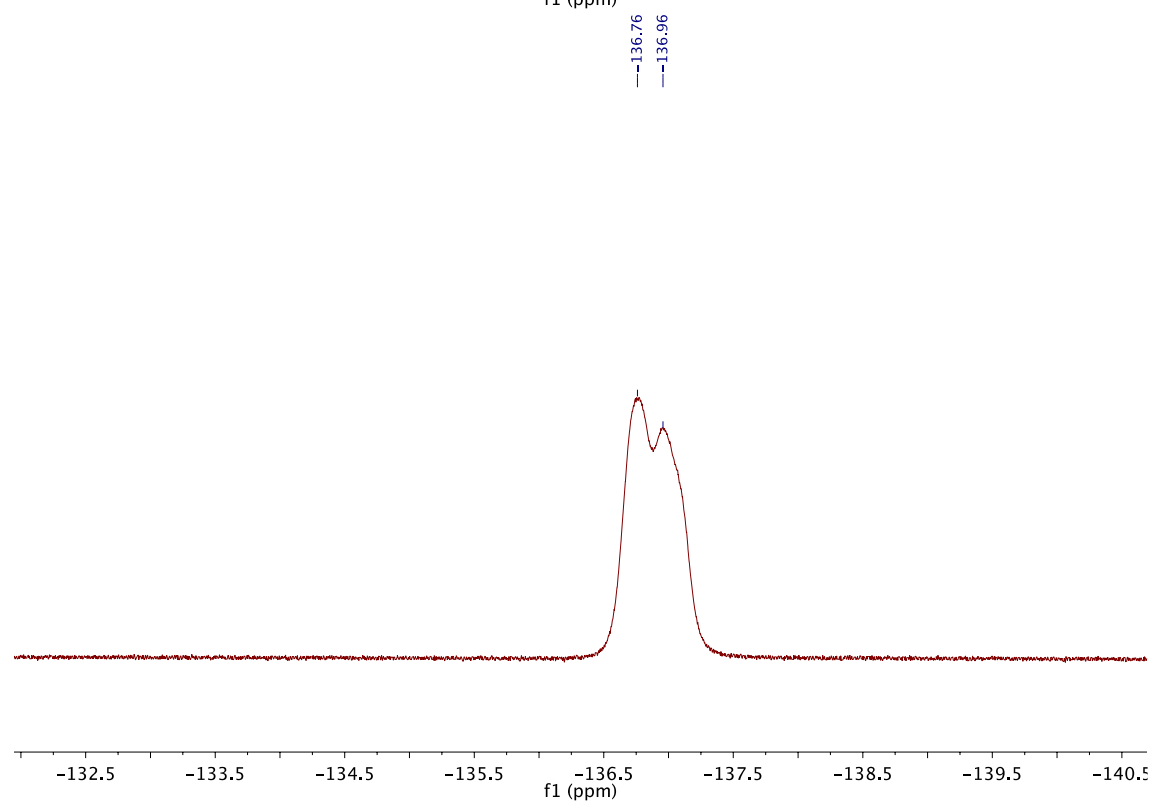

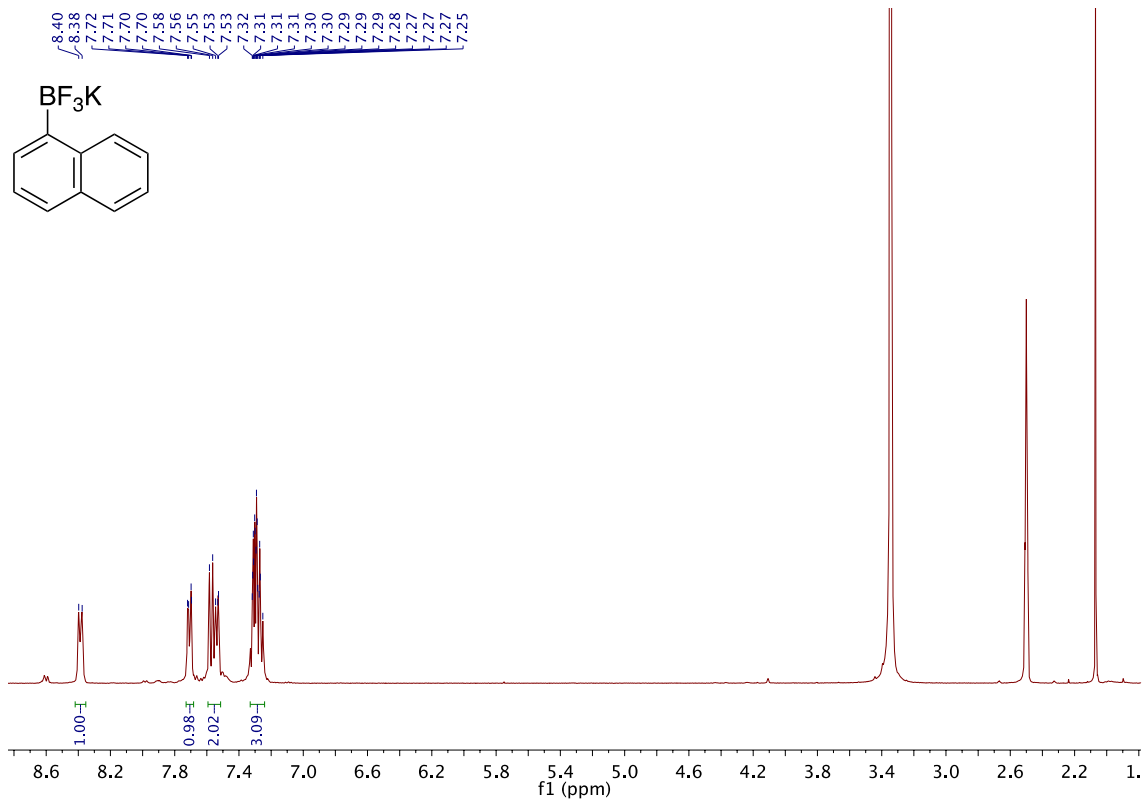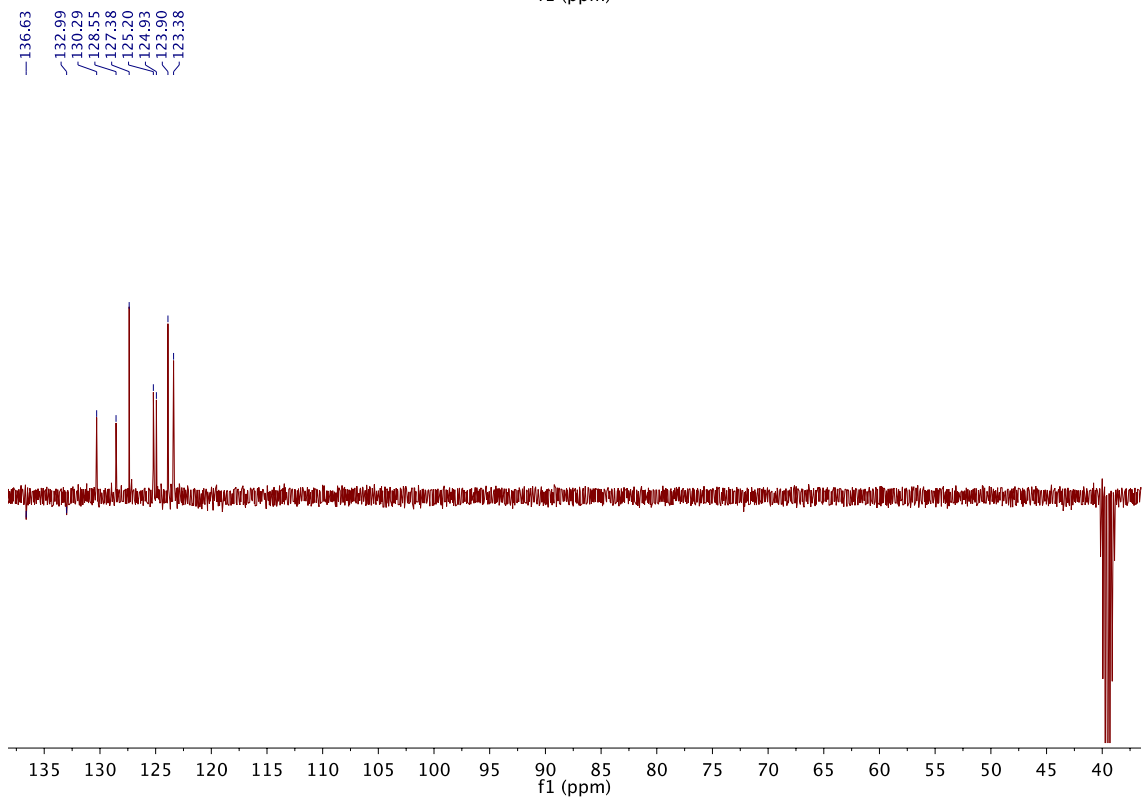

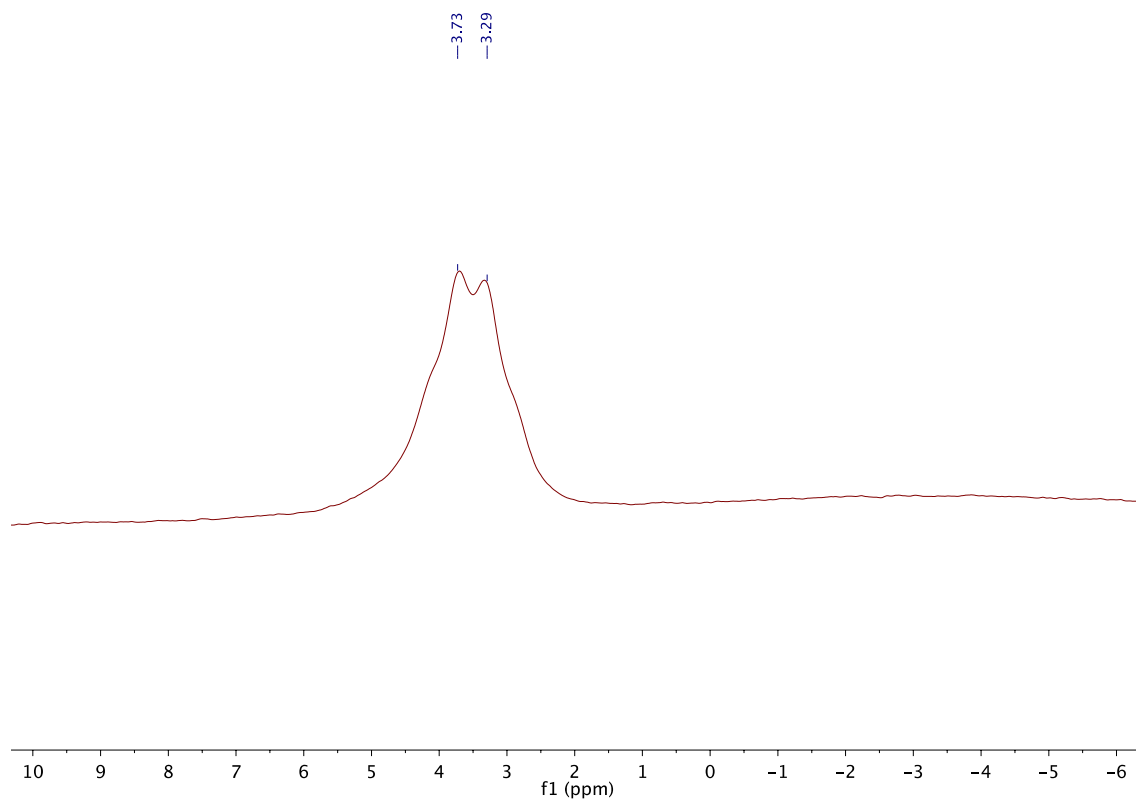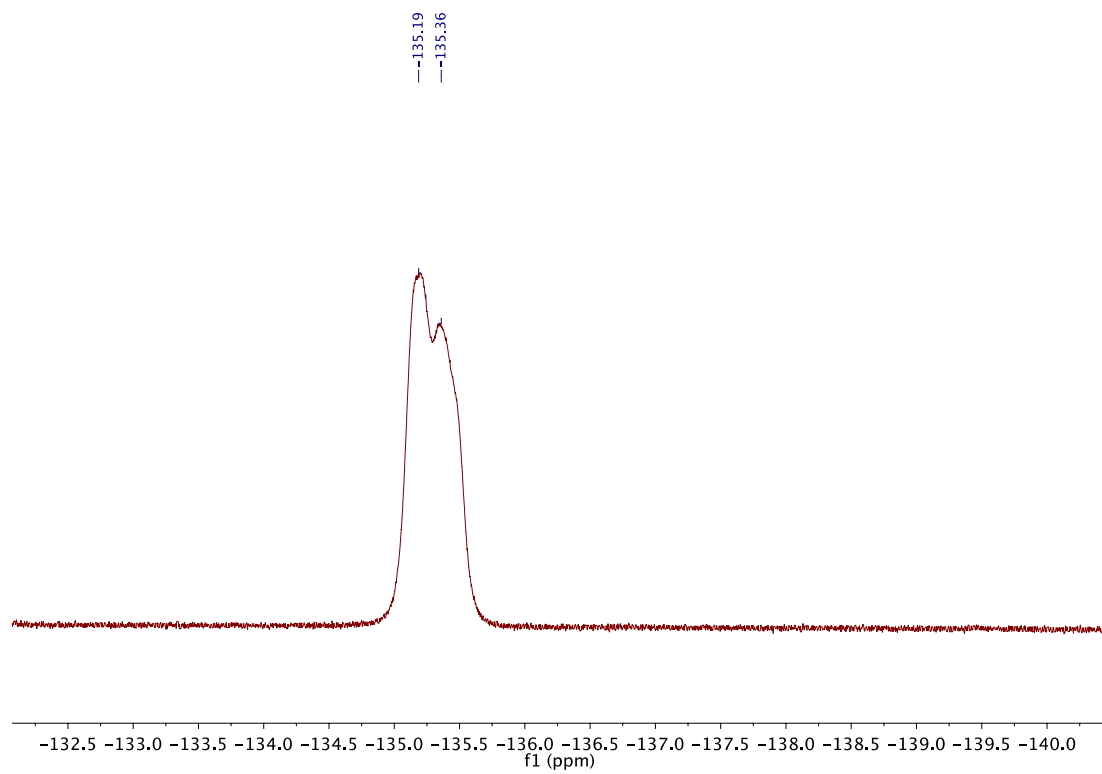

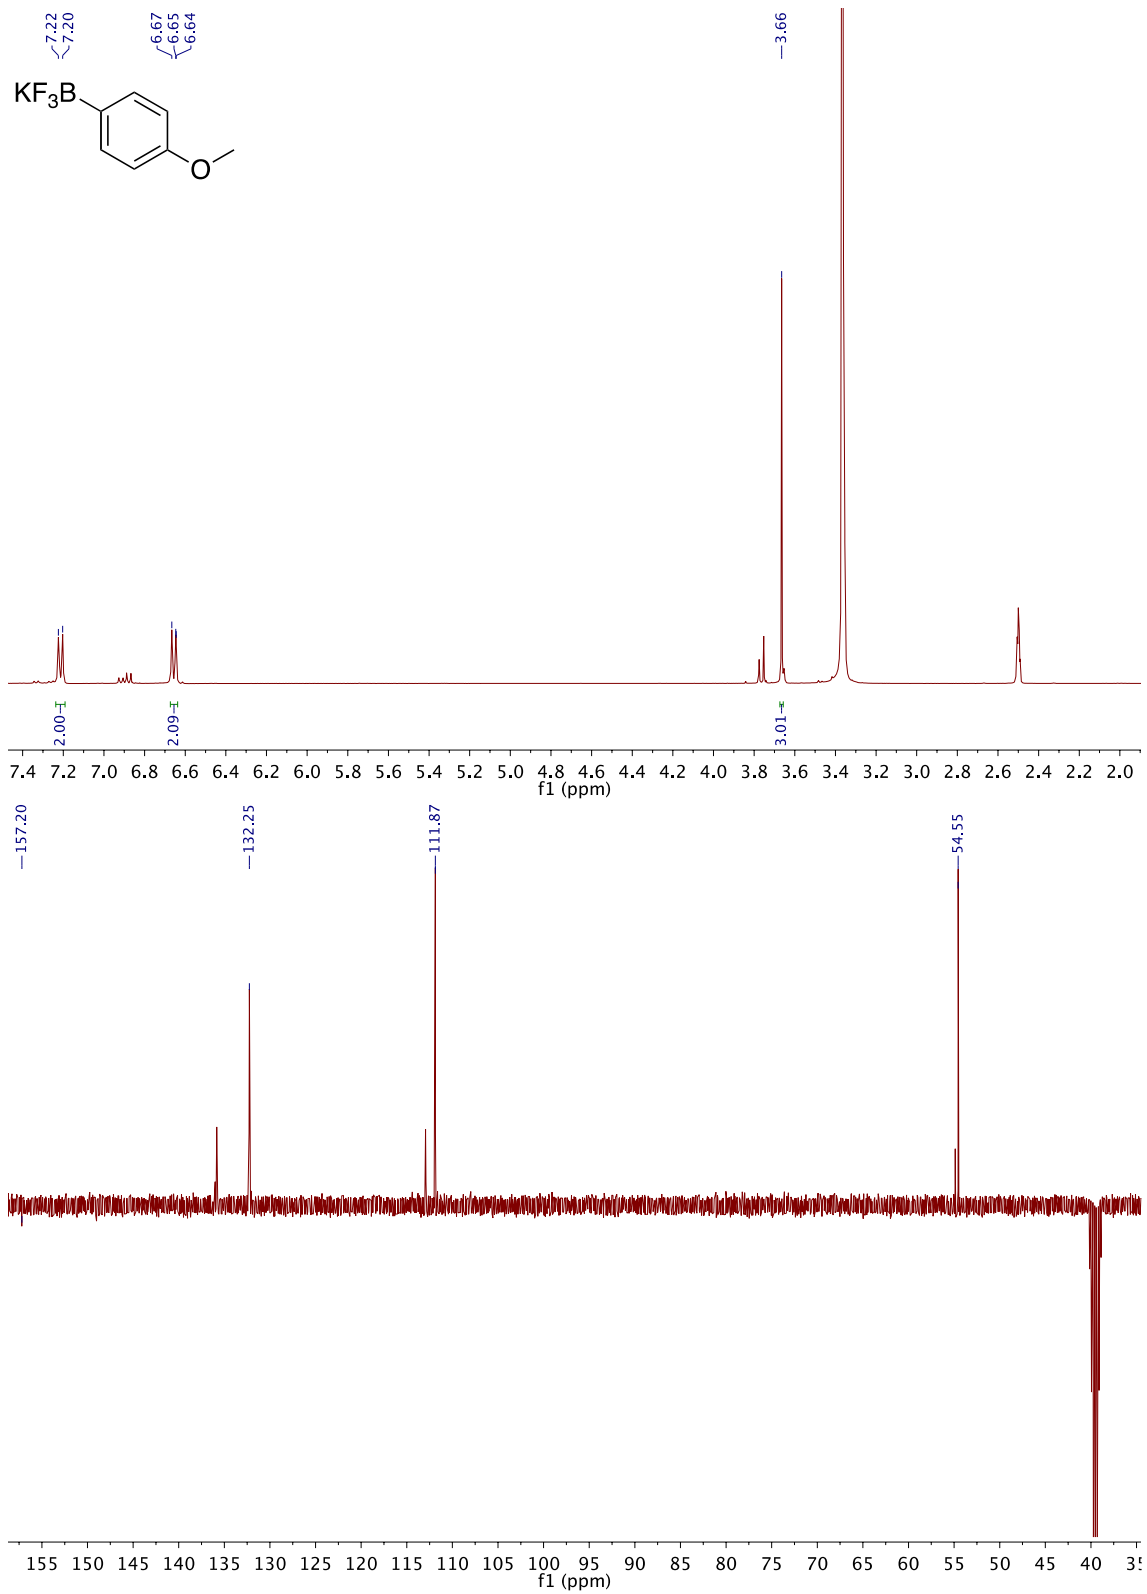

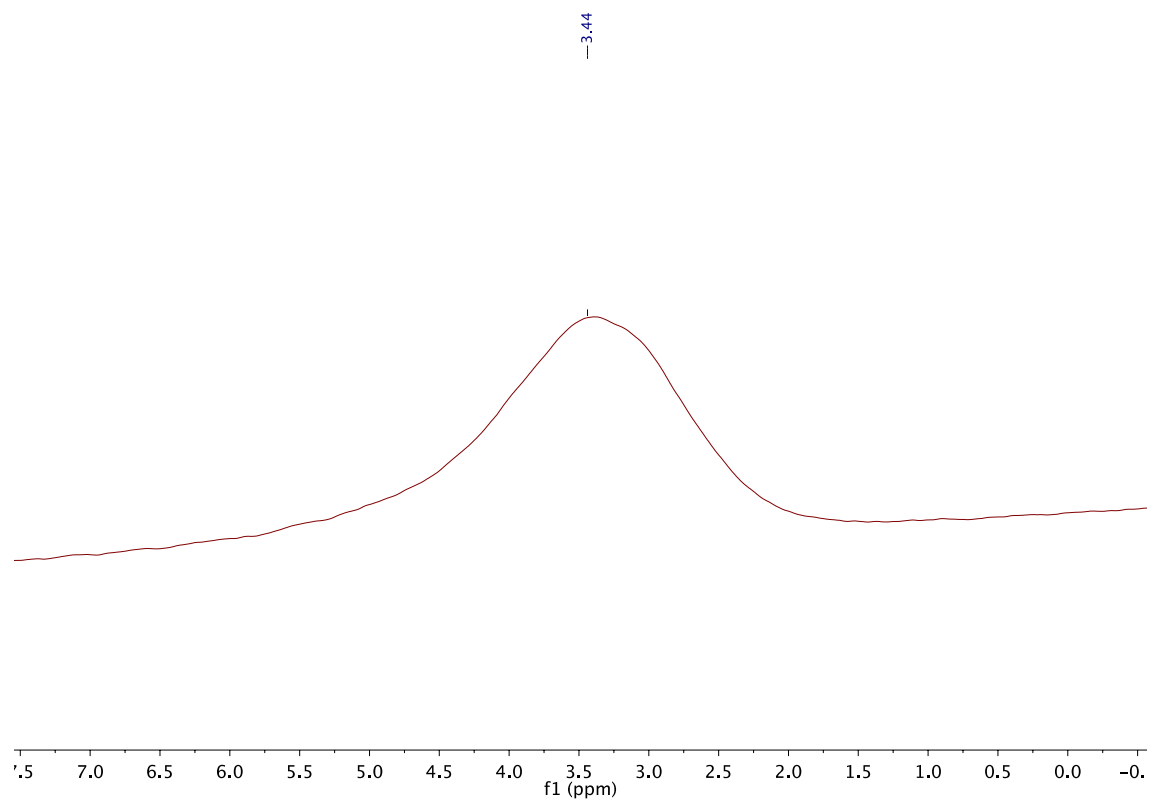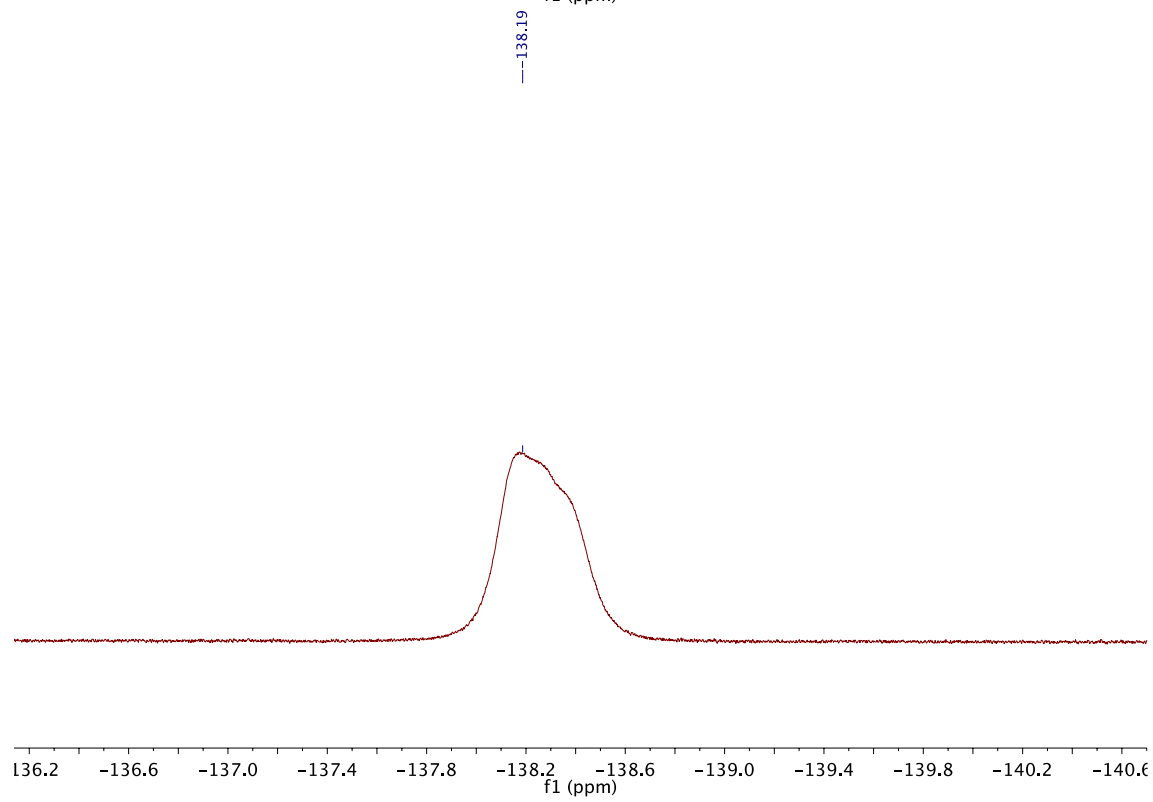

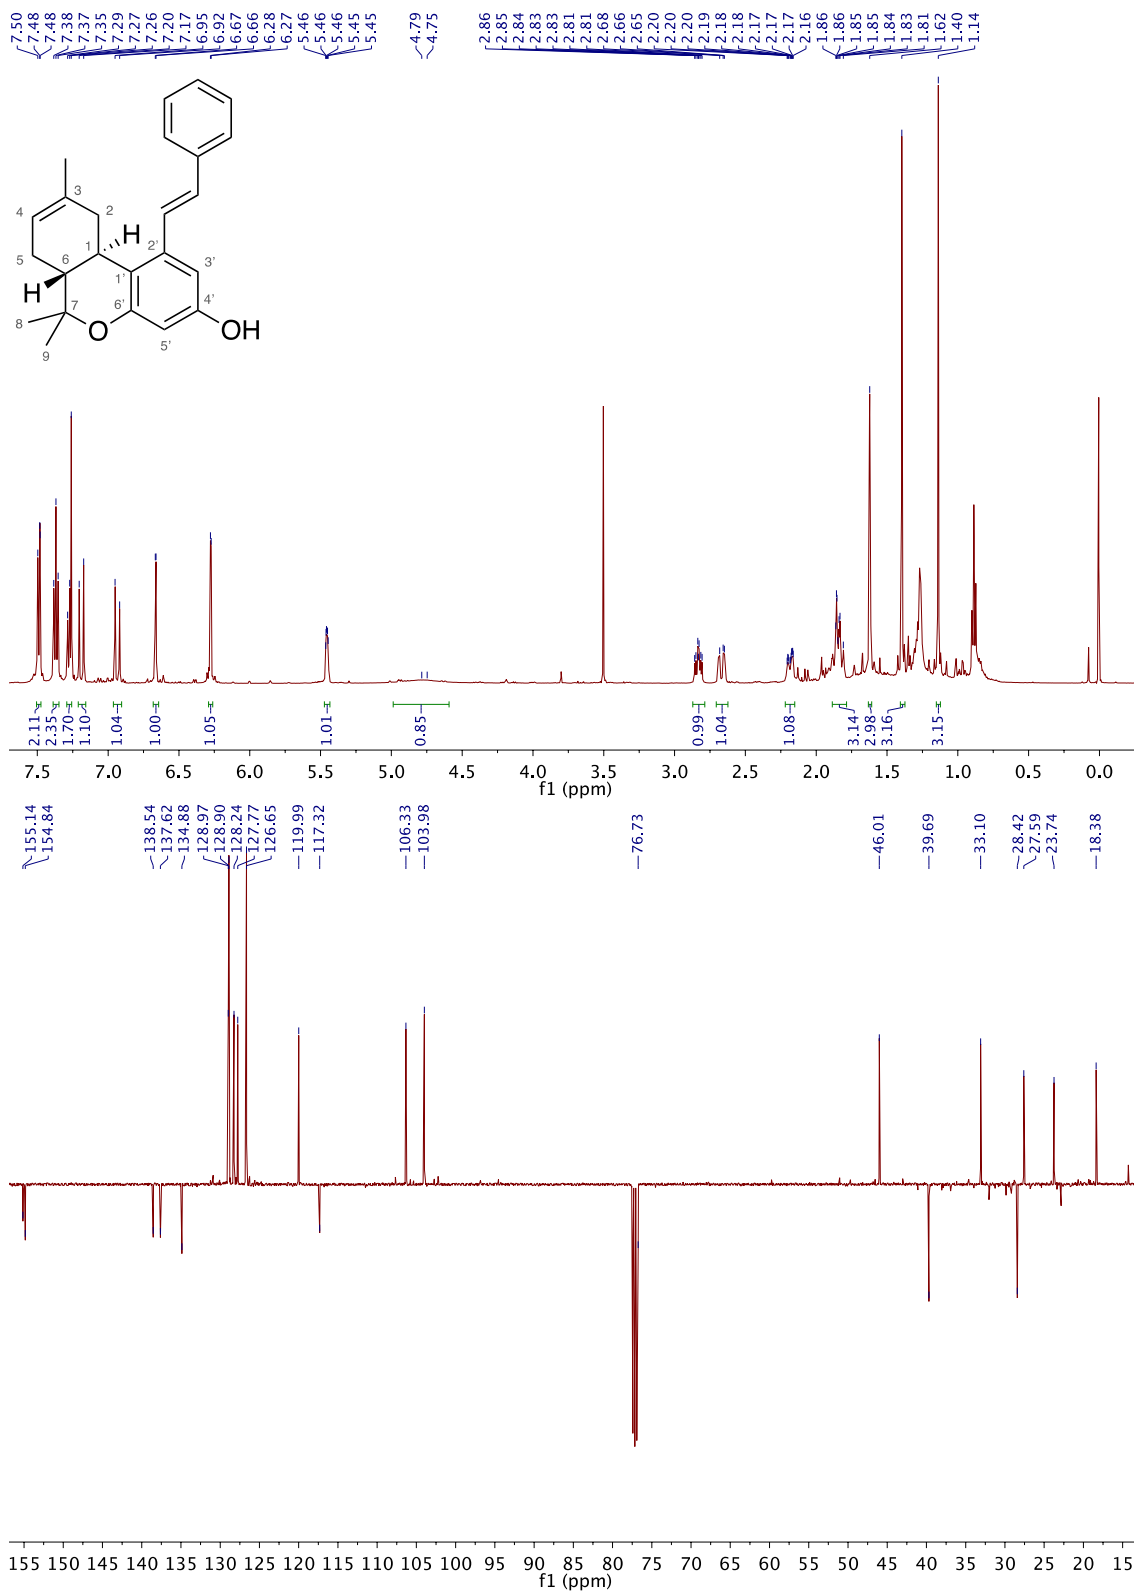

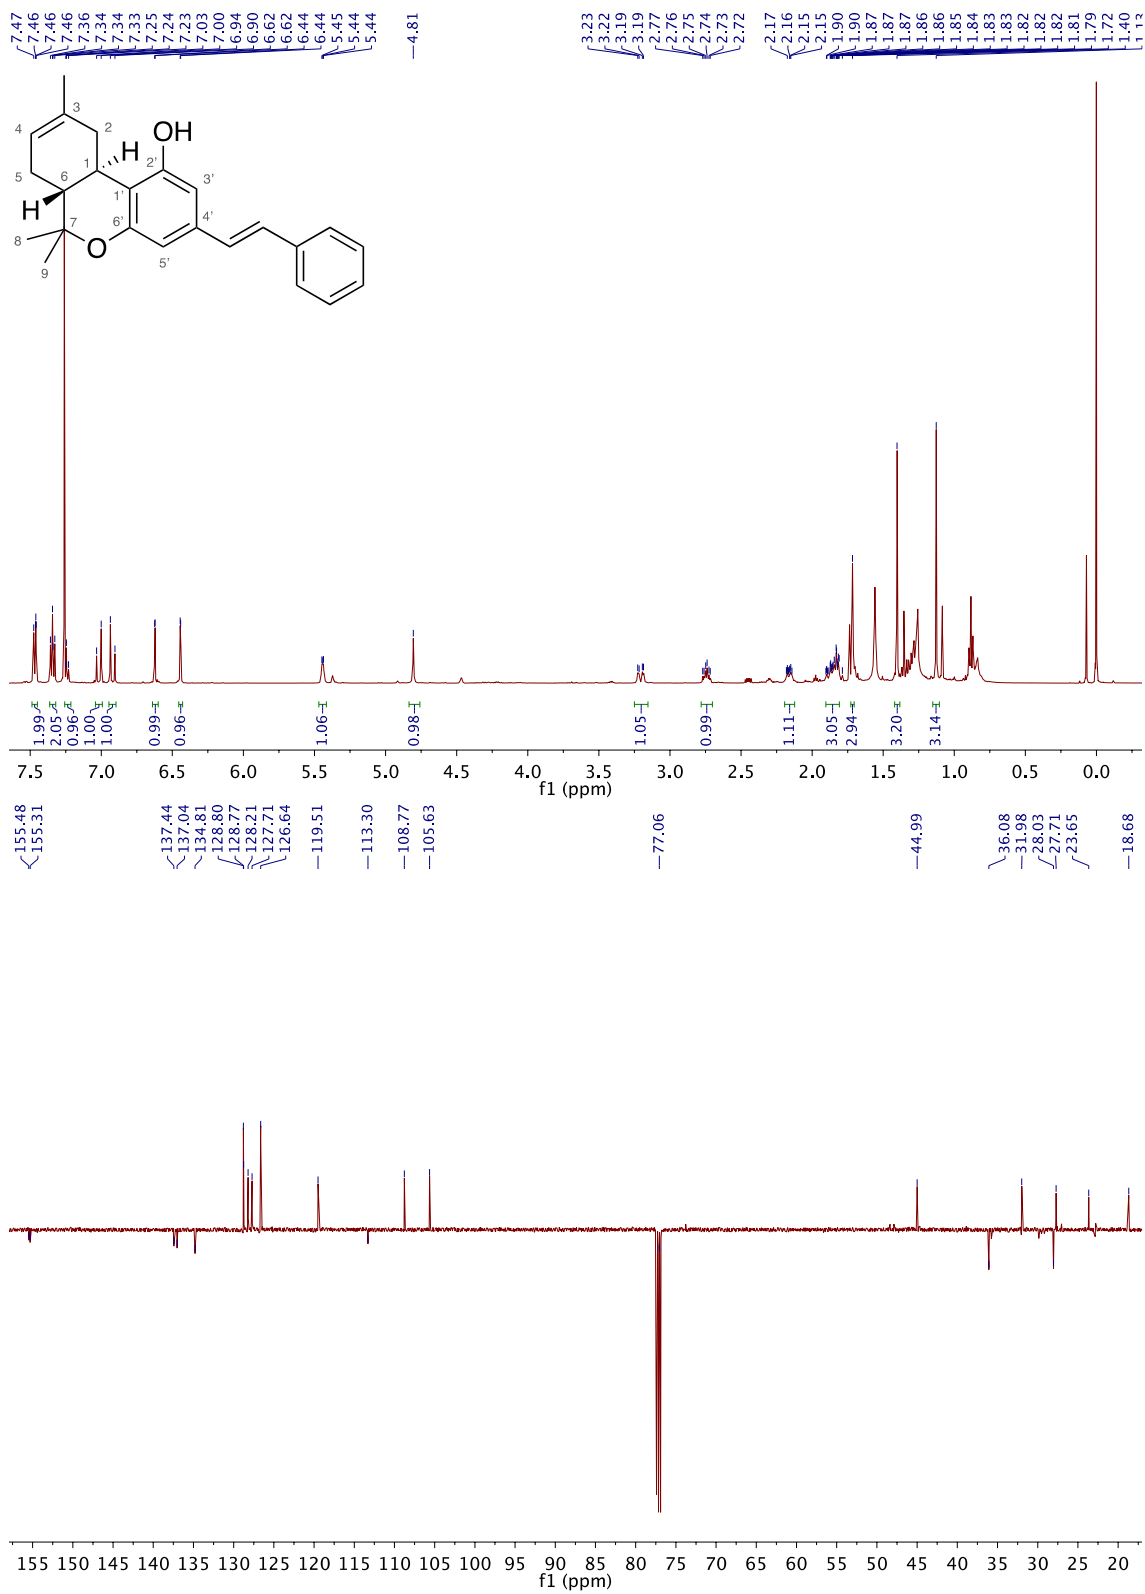



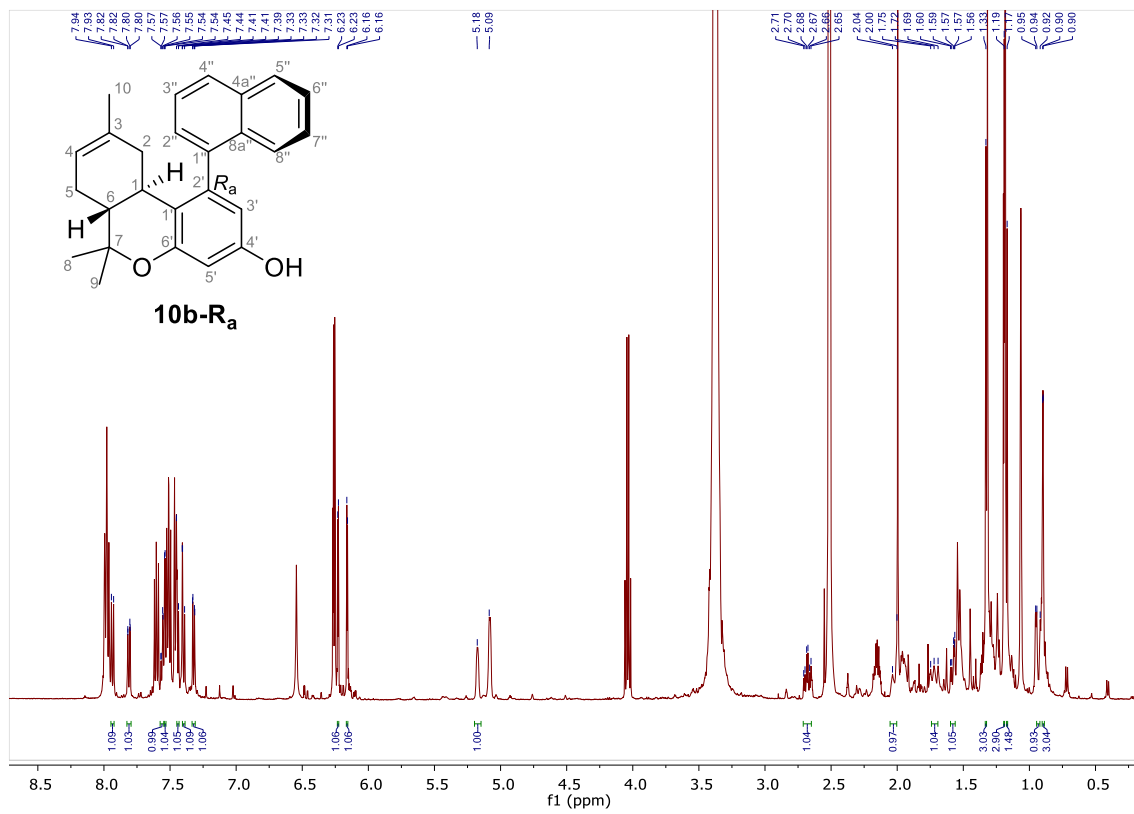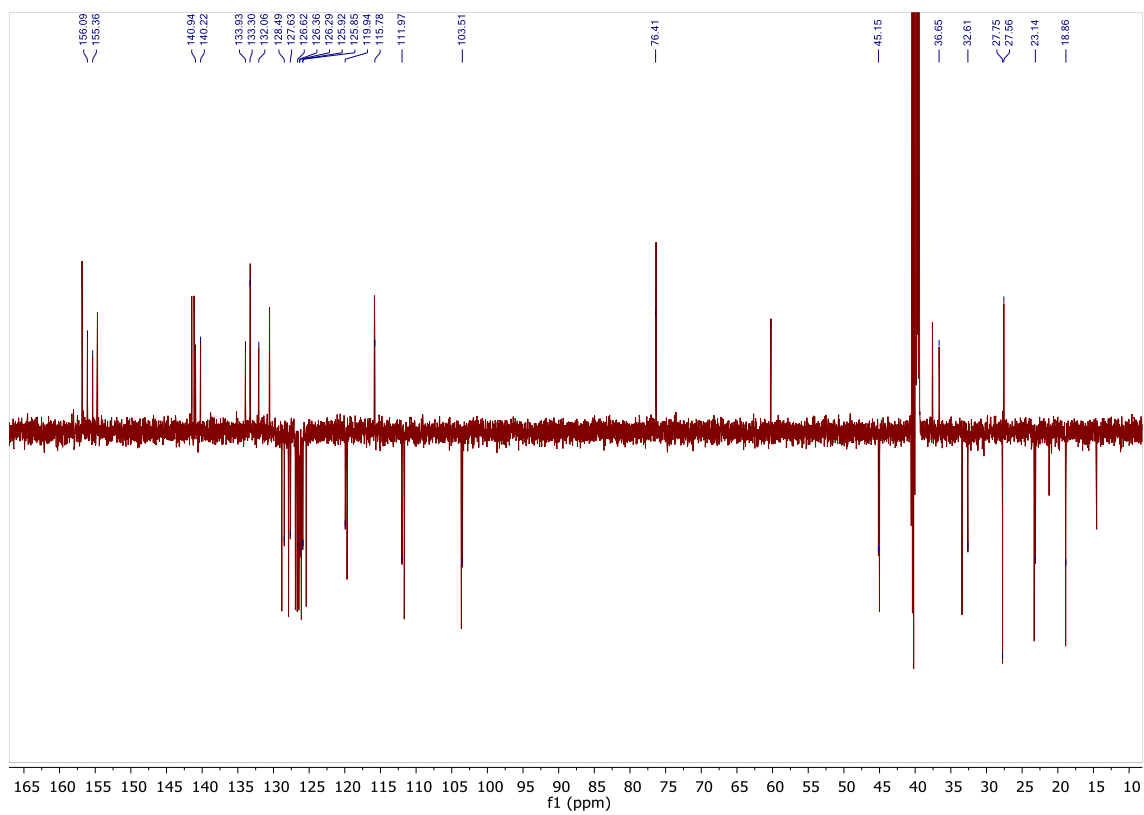



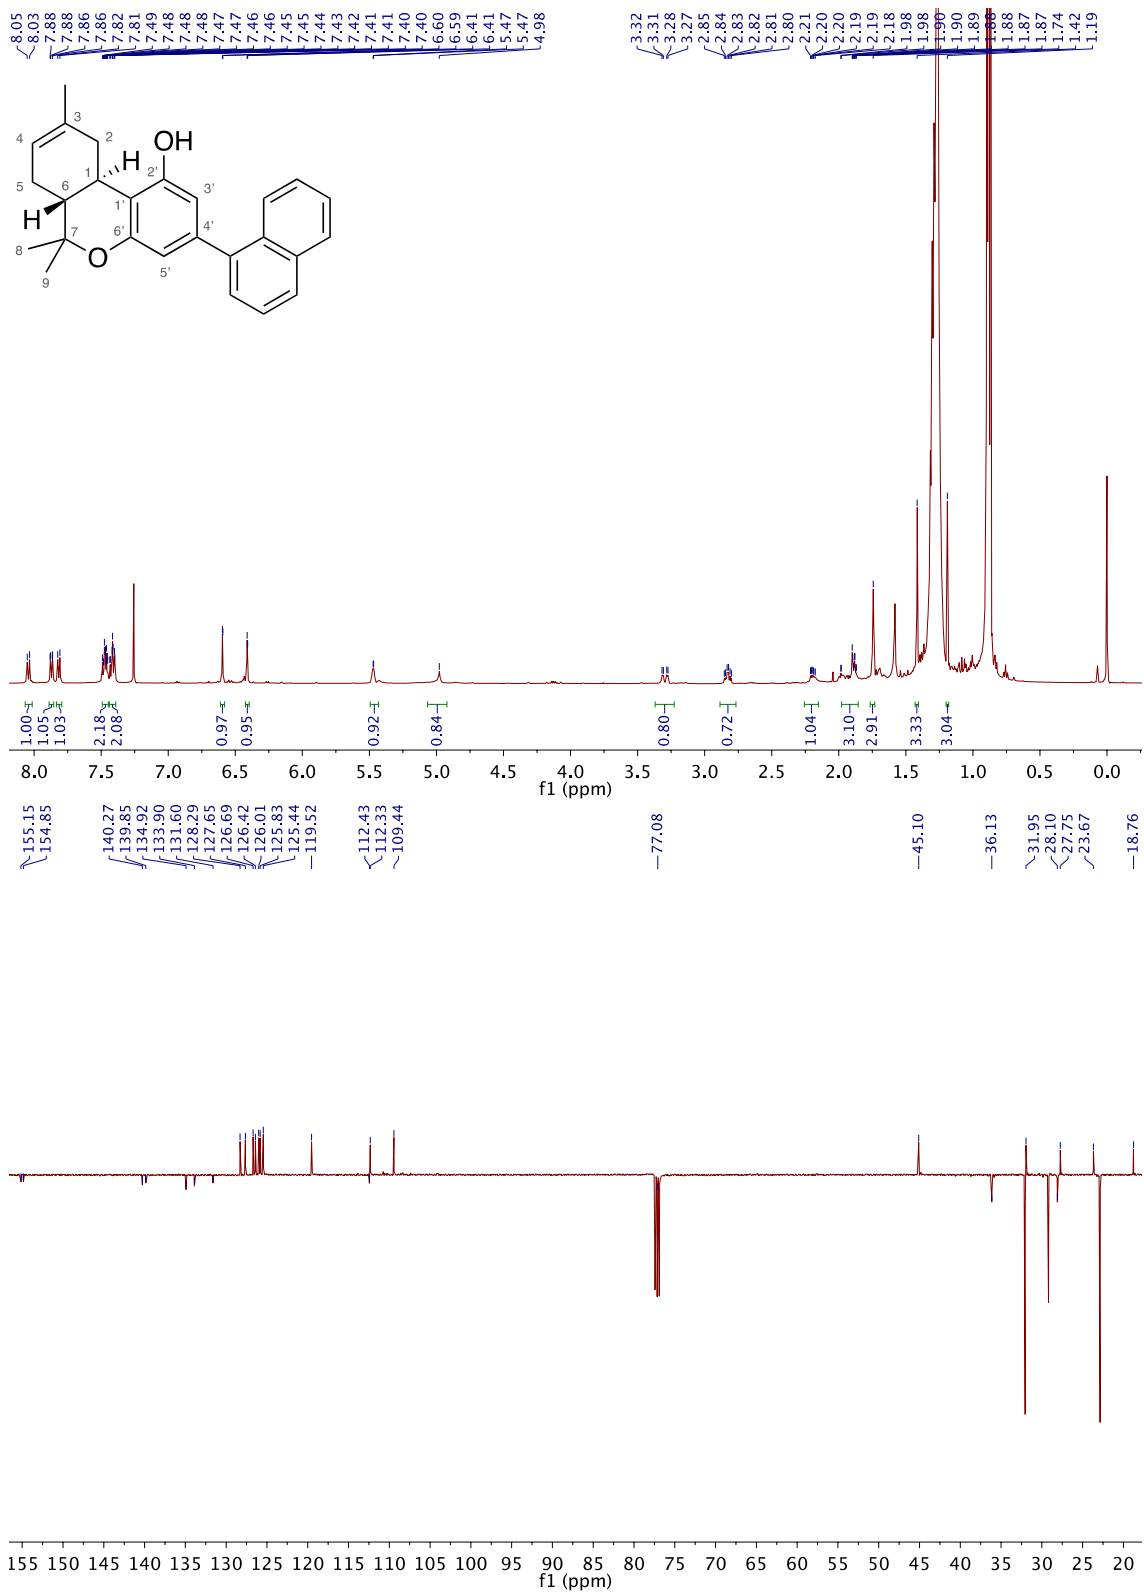

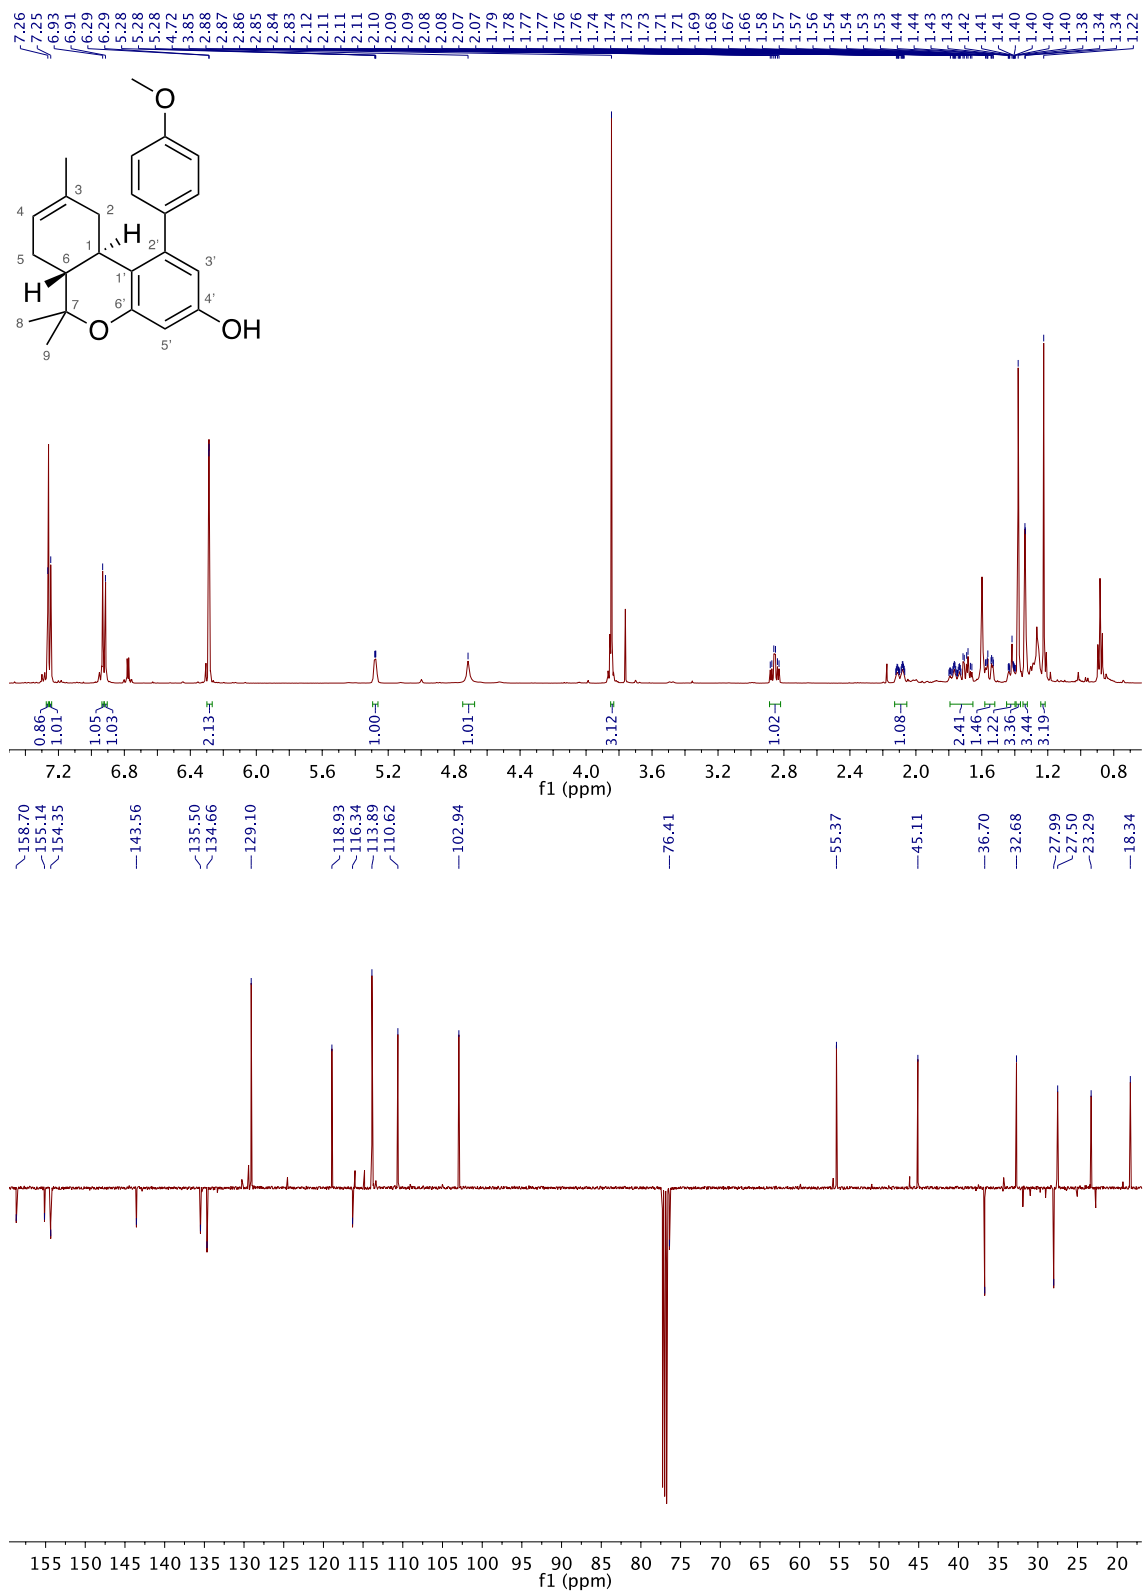

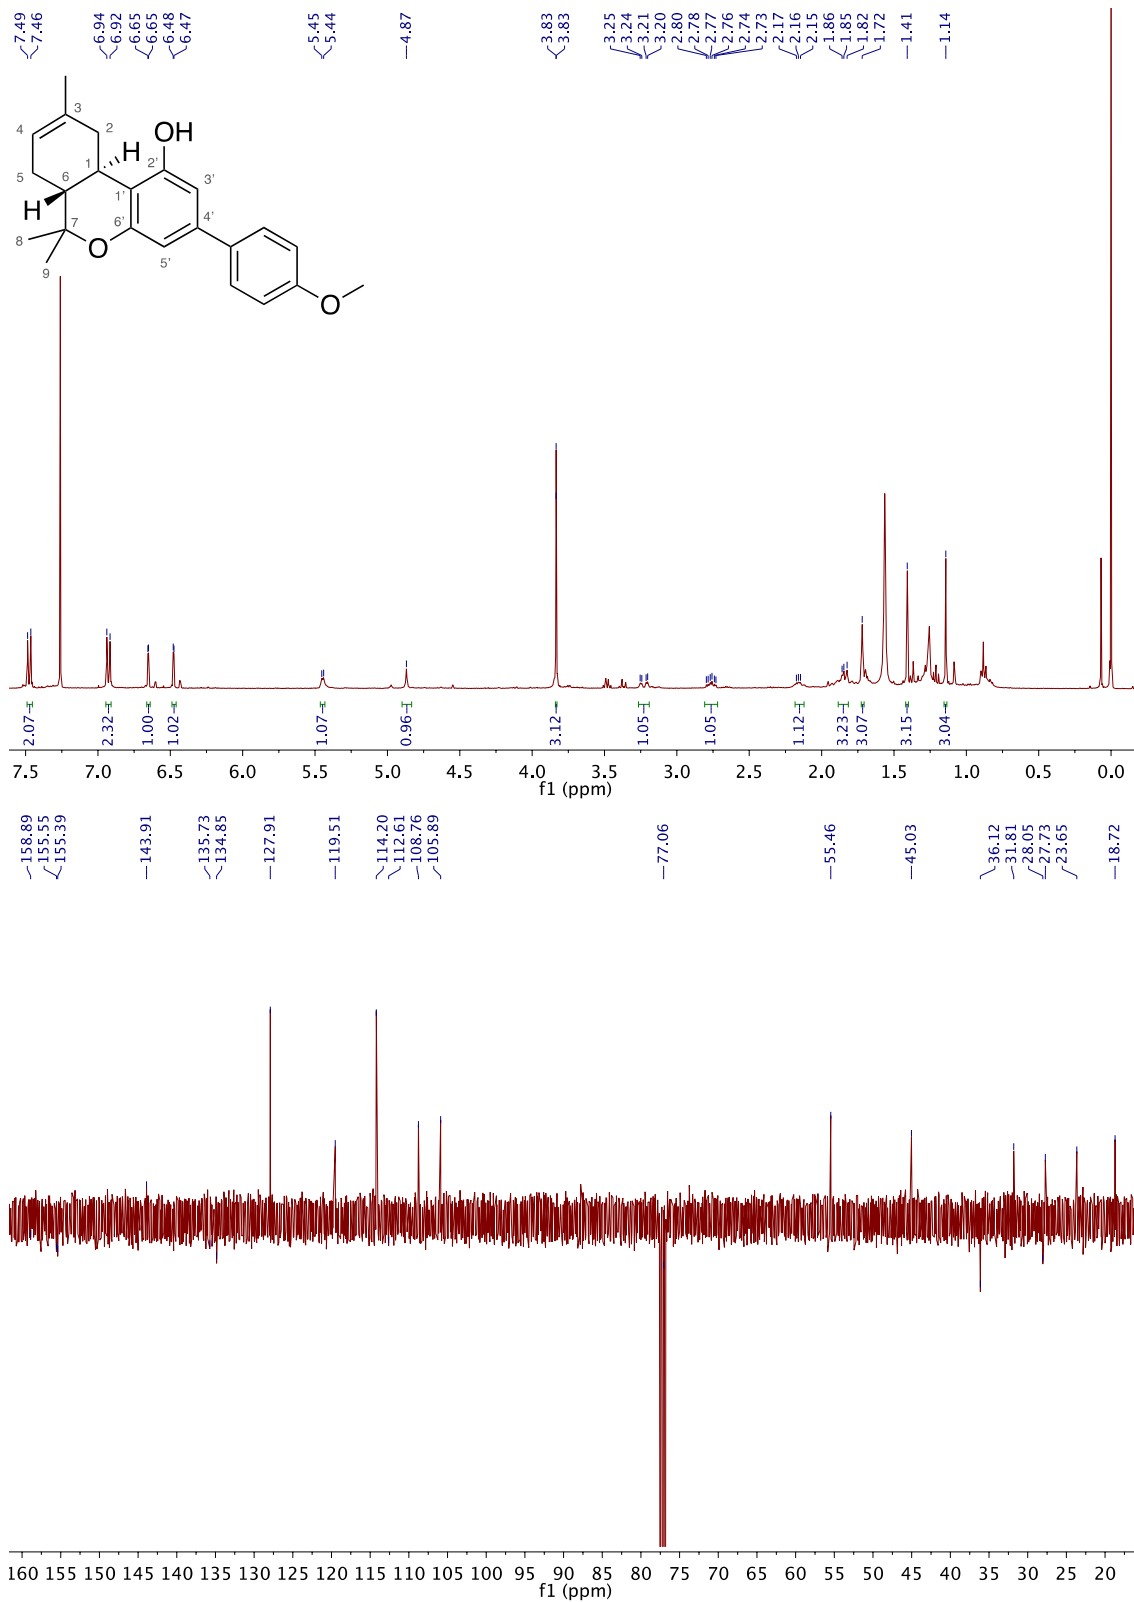

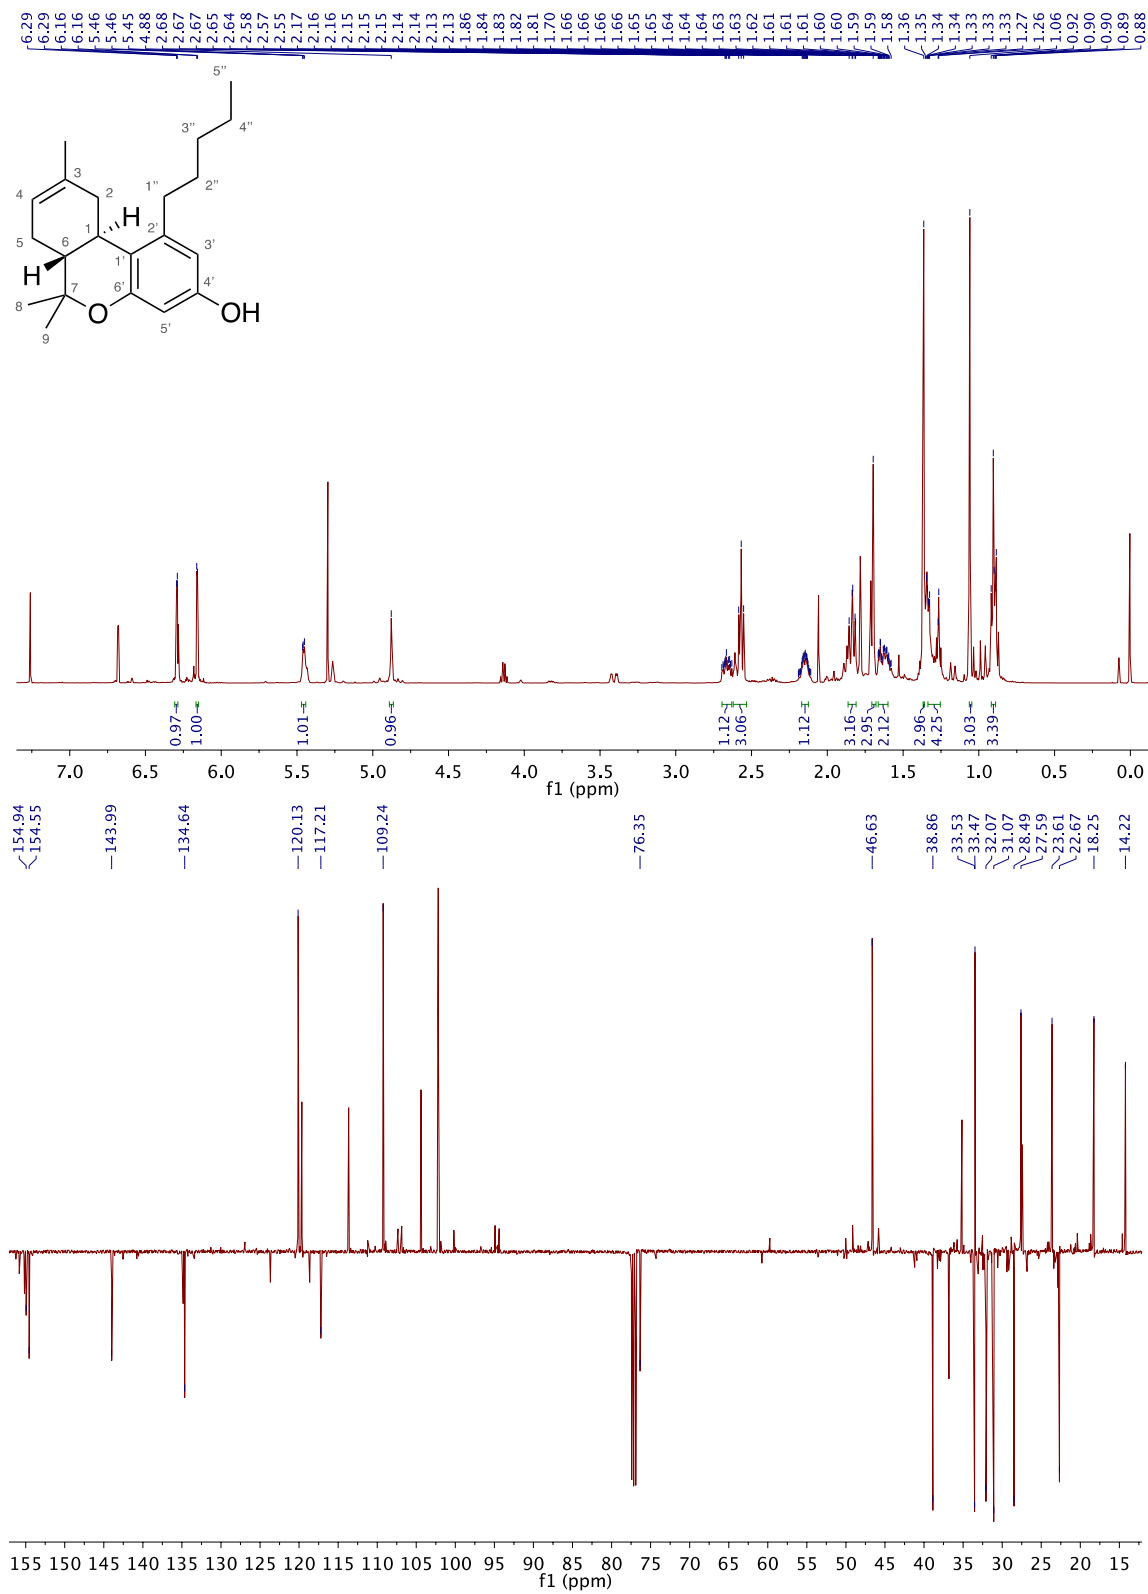

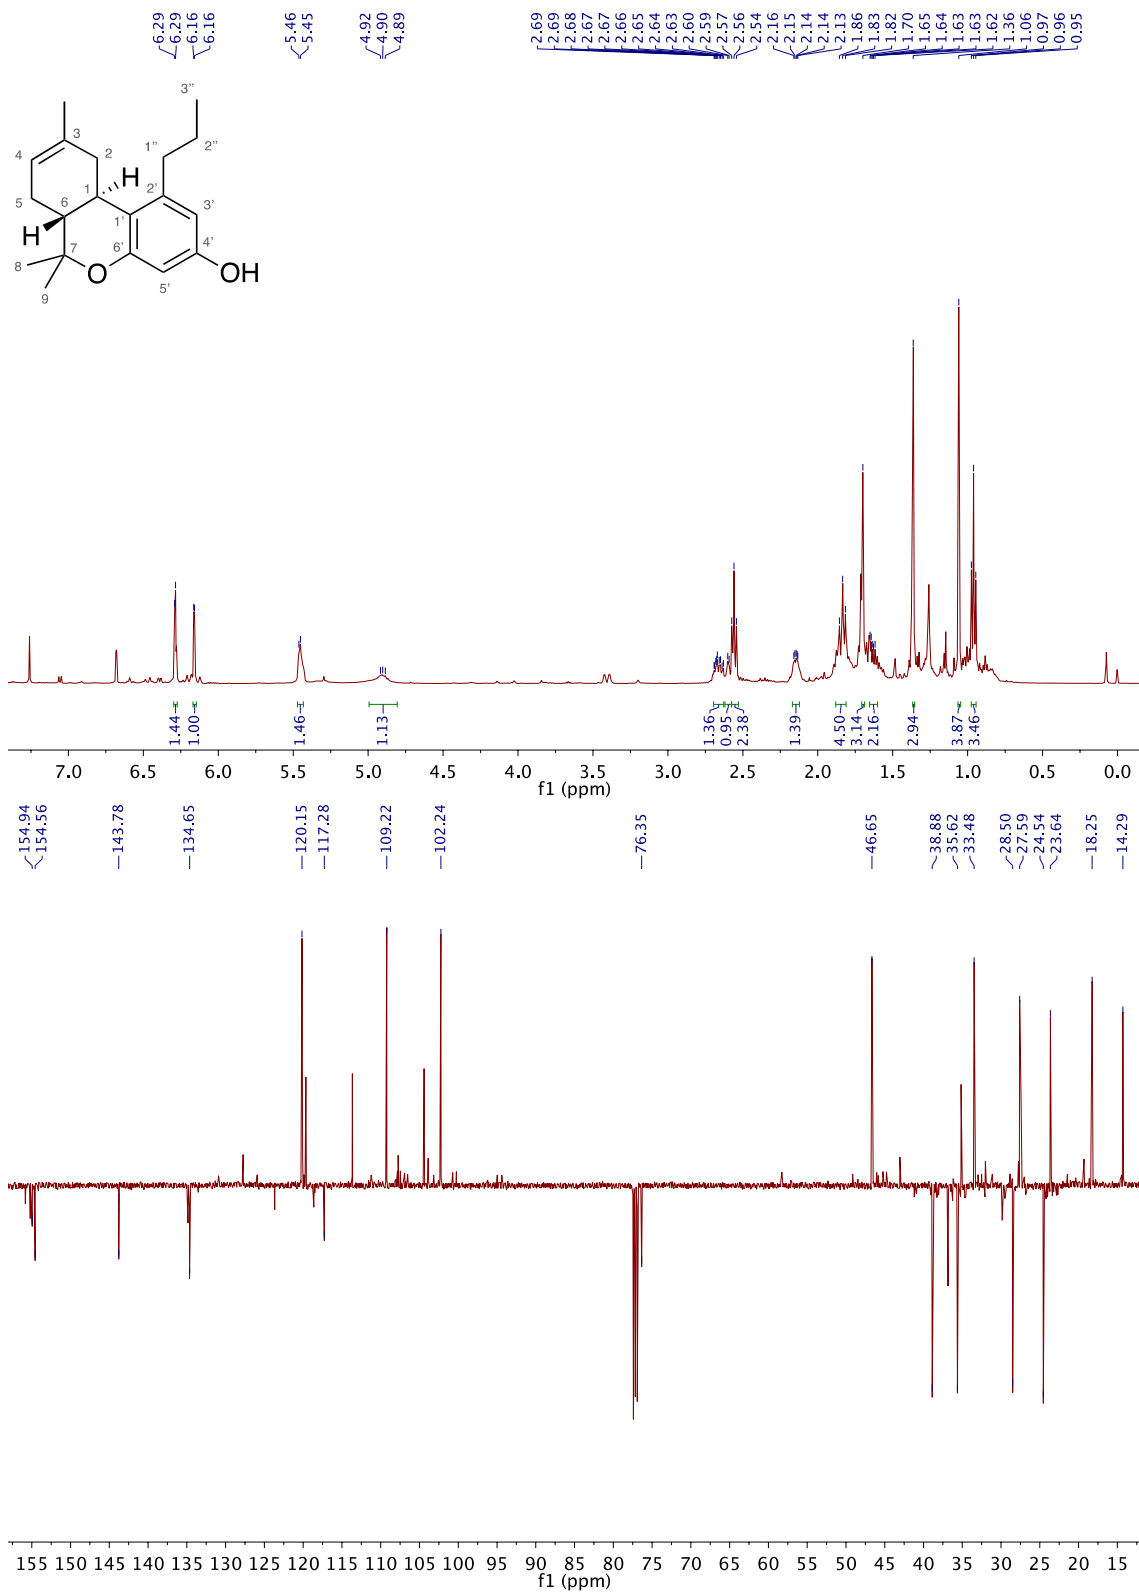

Supplement: EJOC-2019-2289-s001.pdf [file EJOC-2019-2289-s001.pdf]
